# Supplementary material
Source: PubMed Central journal article supplement (PMC4183913)

**SUPPLEMENTARY FIGS. S1–S53.** Raw data plots for each subject admission showing individual glucose profiles, insulin delivery data, and other events. Anncd, announced; CGM, continuous glucose measurement; CHO, carbohydrate; FS, fingerstick; Hypo, hypoglycemia; Perf, performed; YSI, YSI clinical laboratory analyzer instrument.

# Subject 1

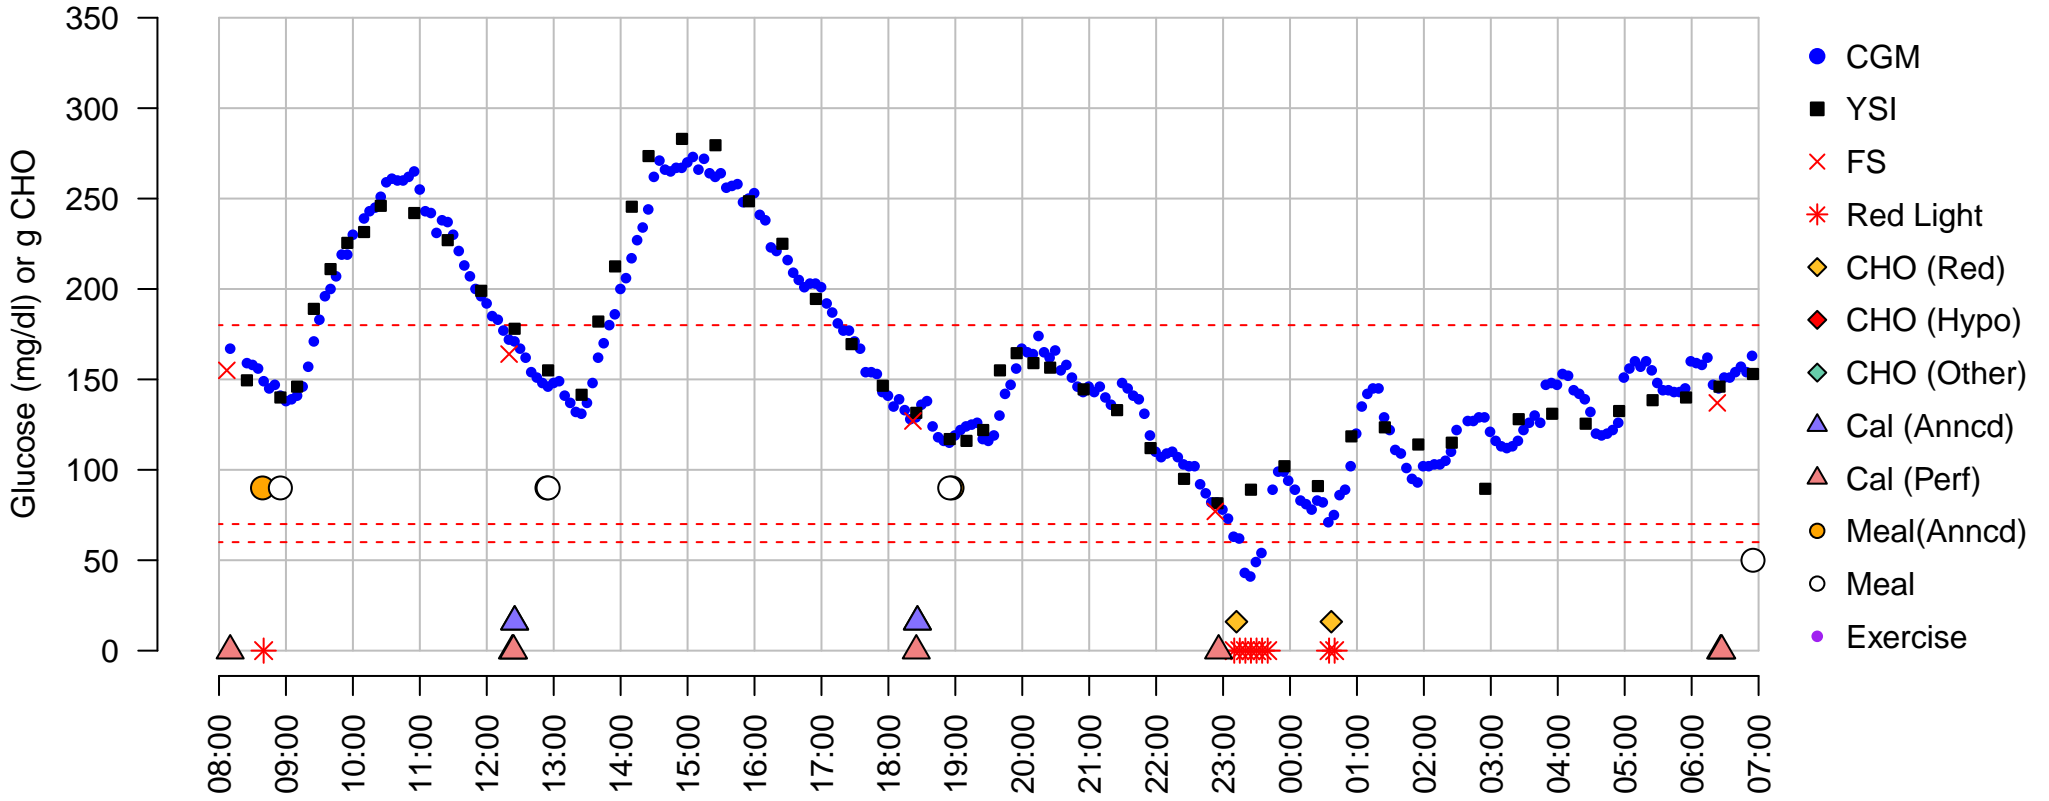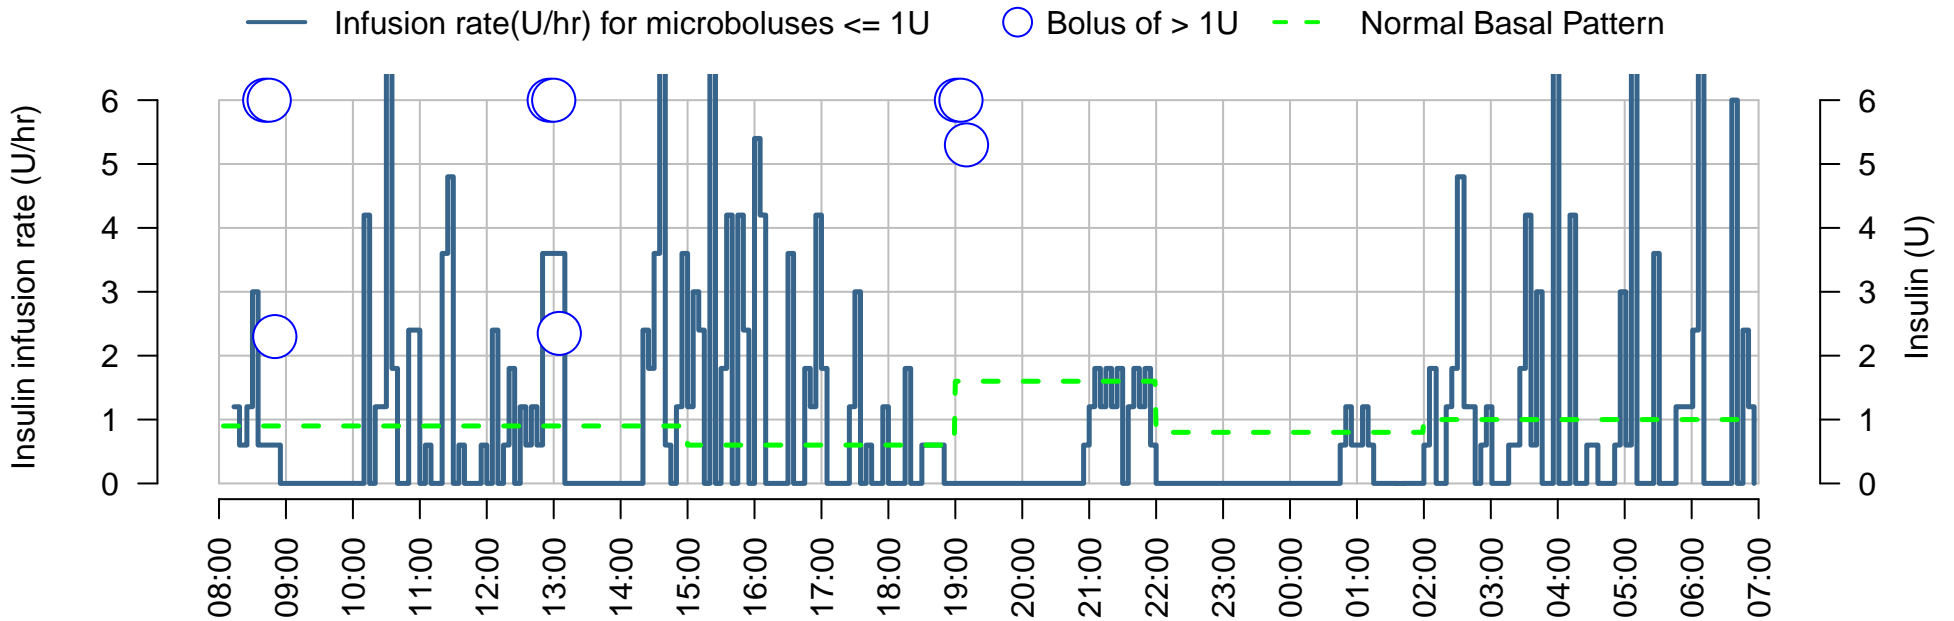

# Subject 2

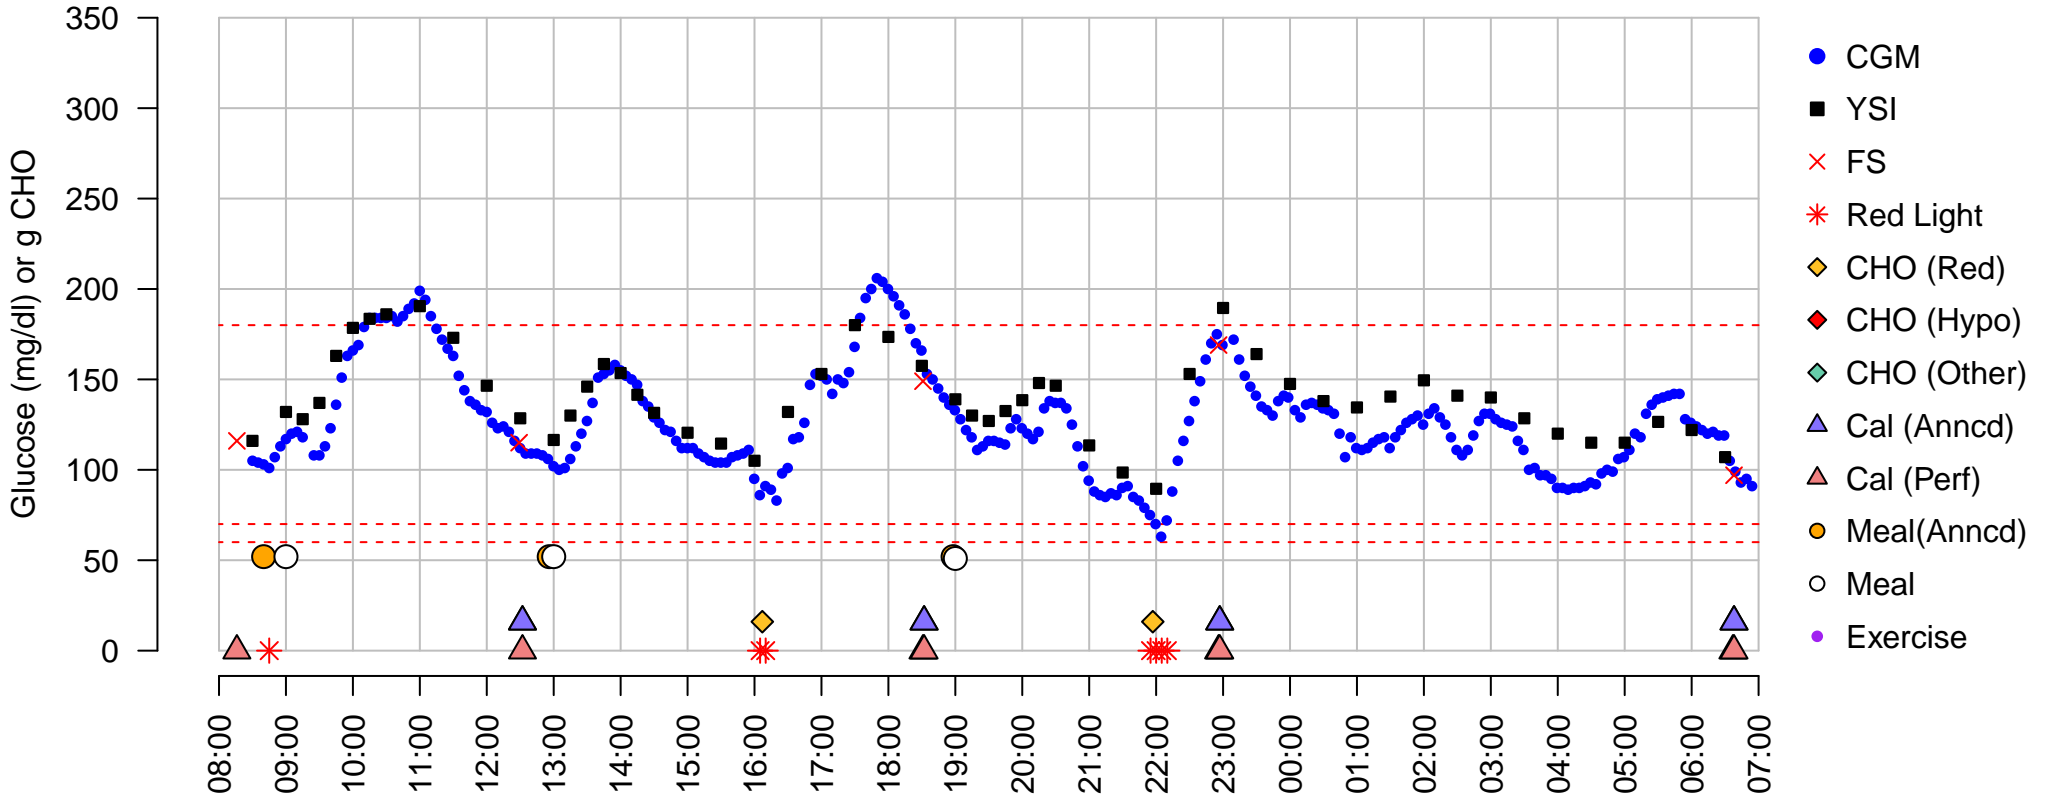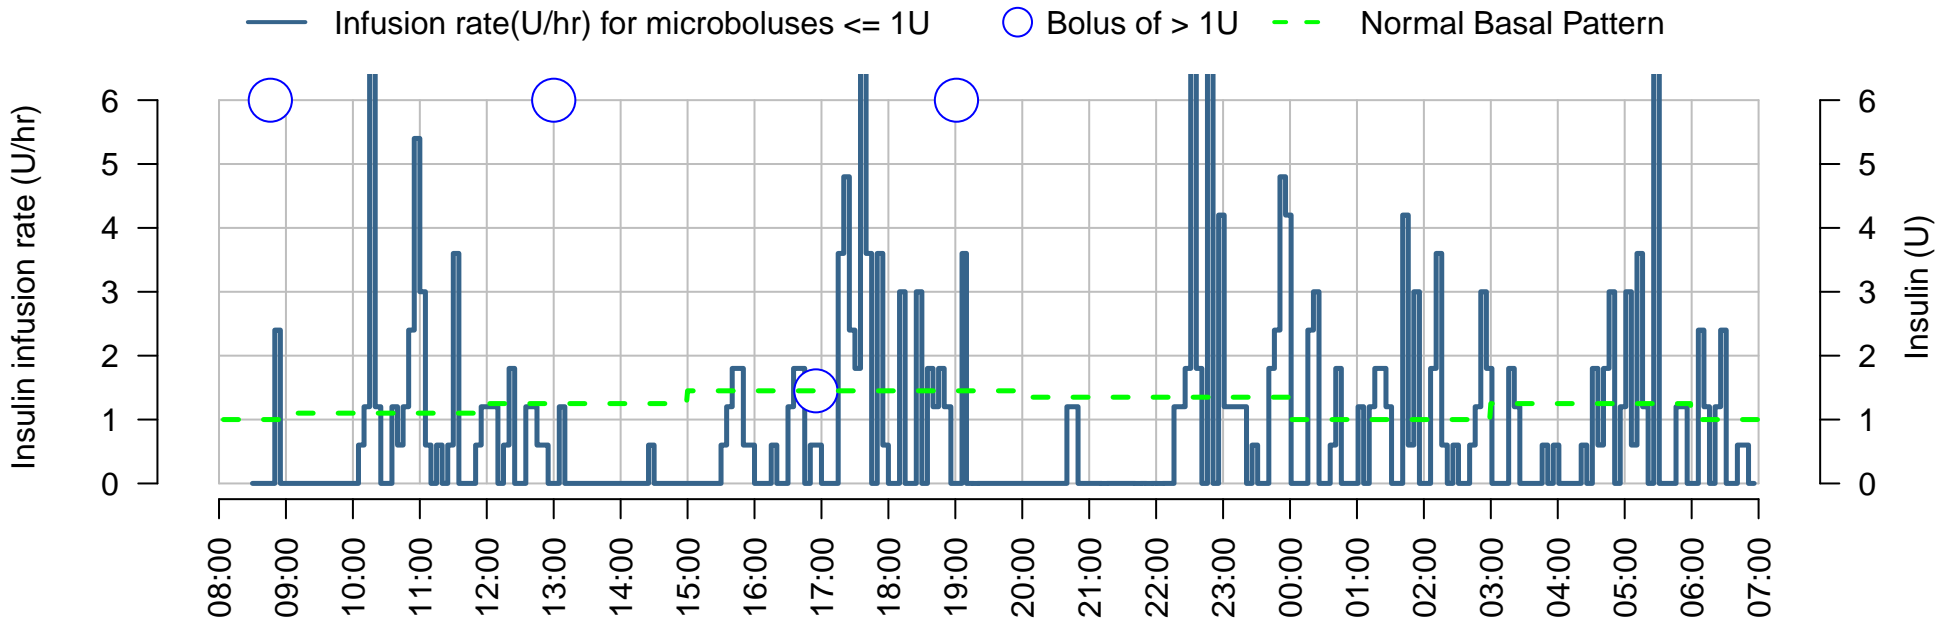

# Subject 3

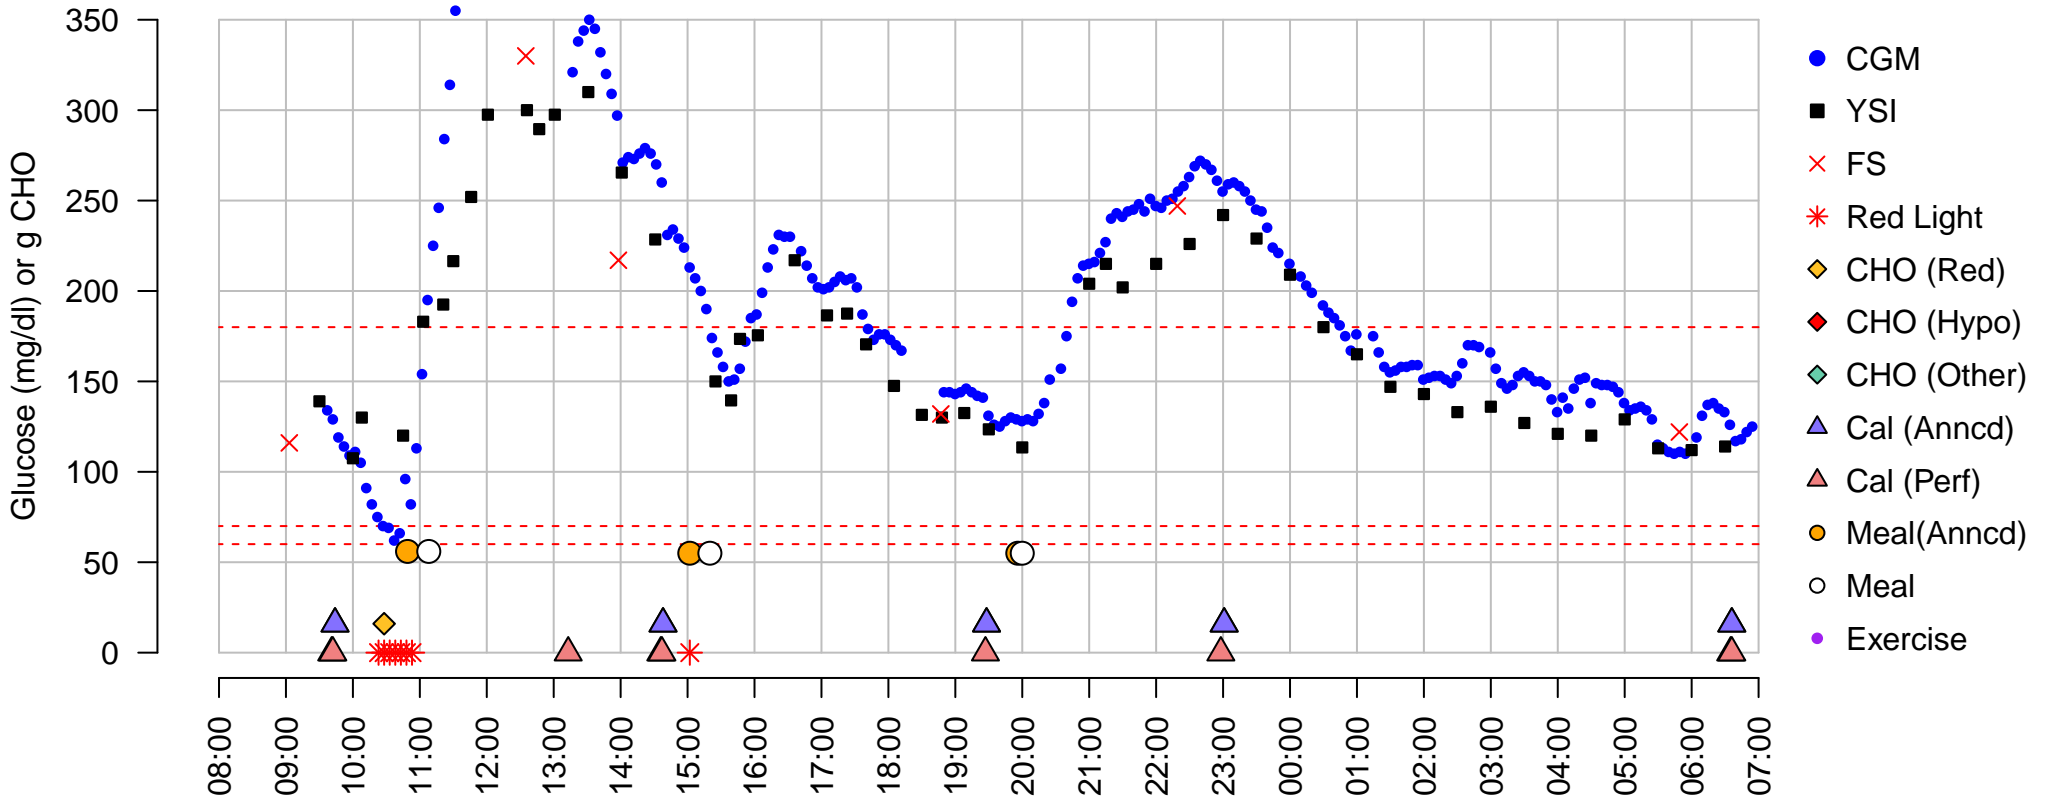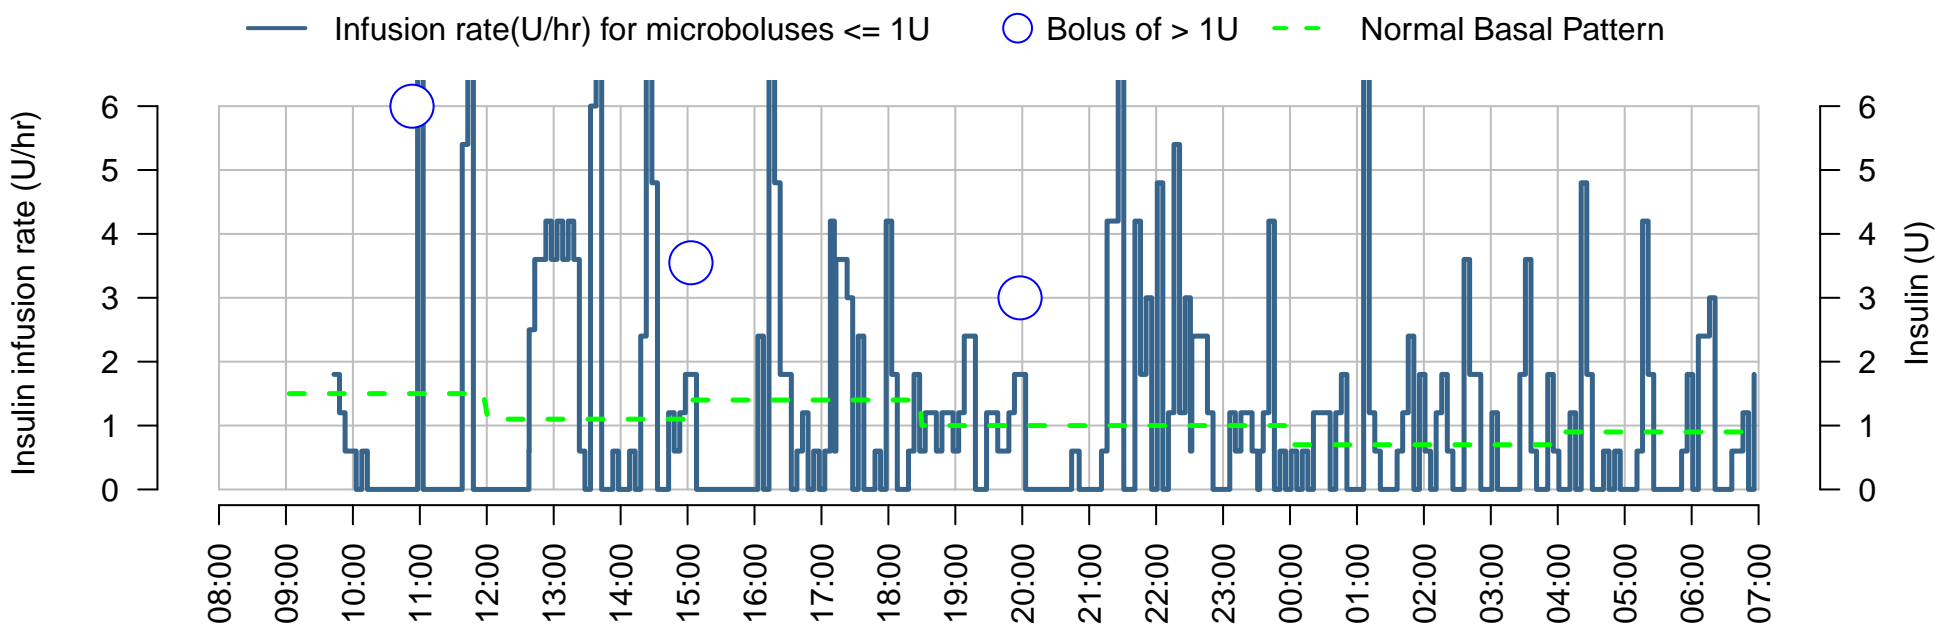

# Subject 4

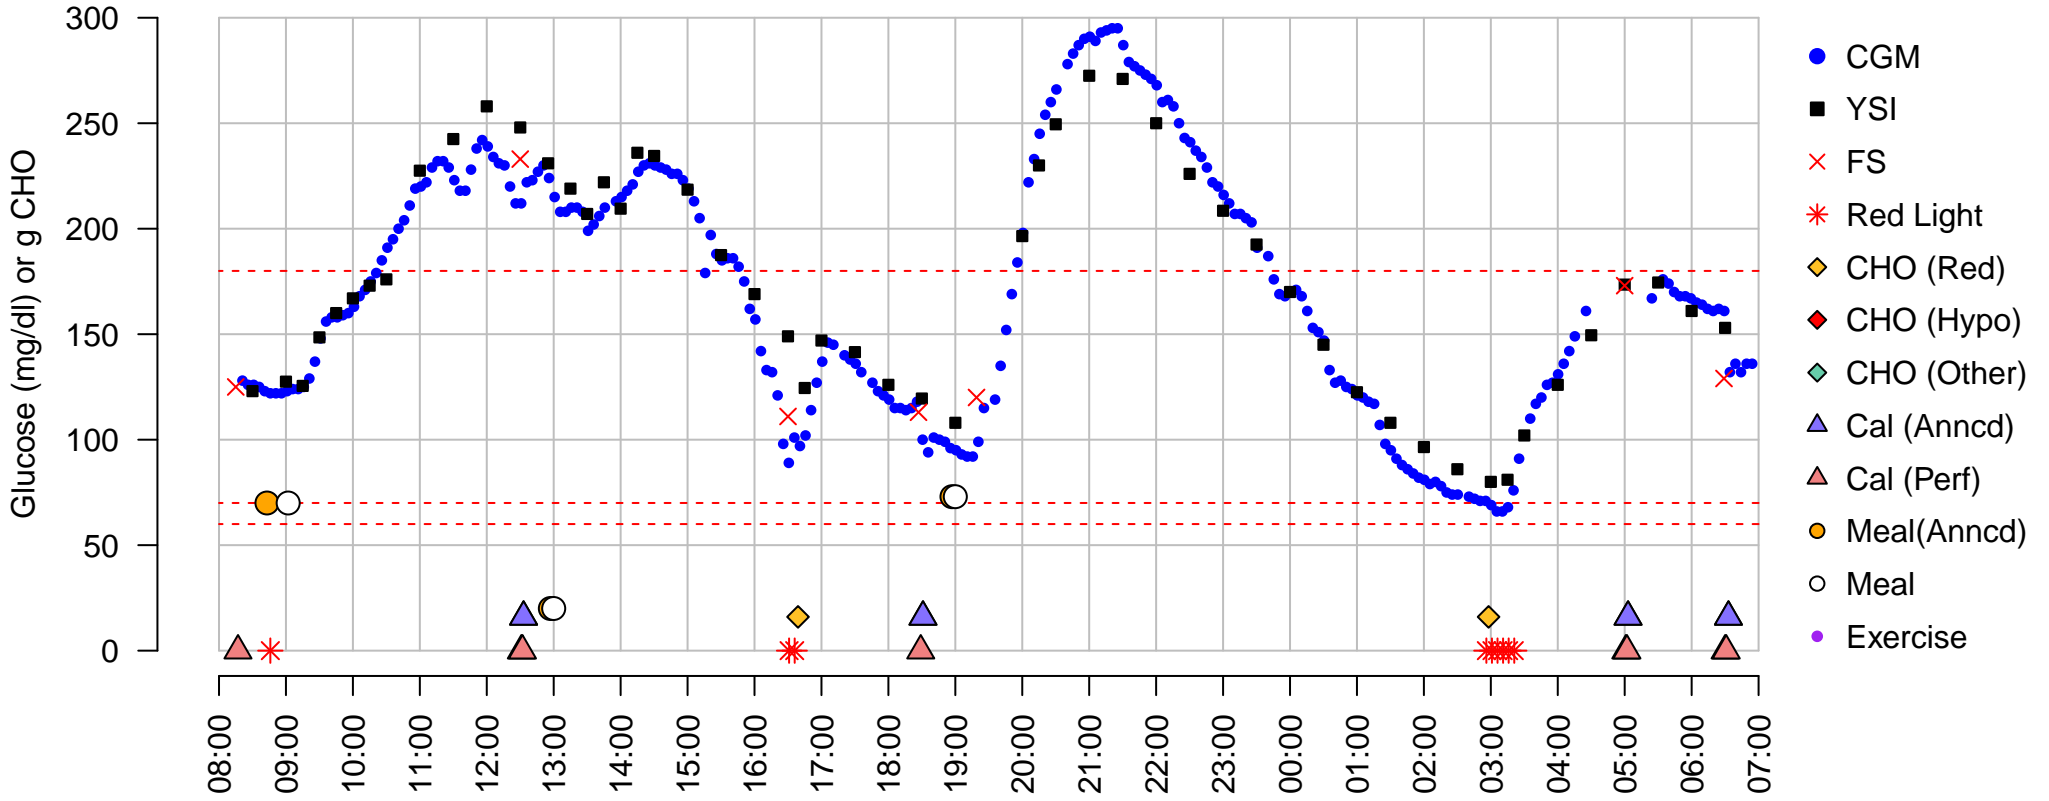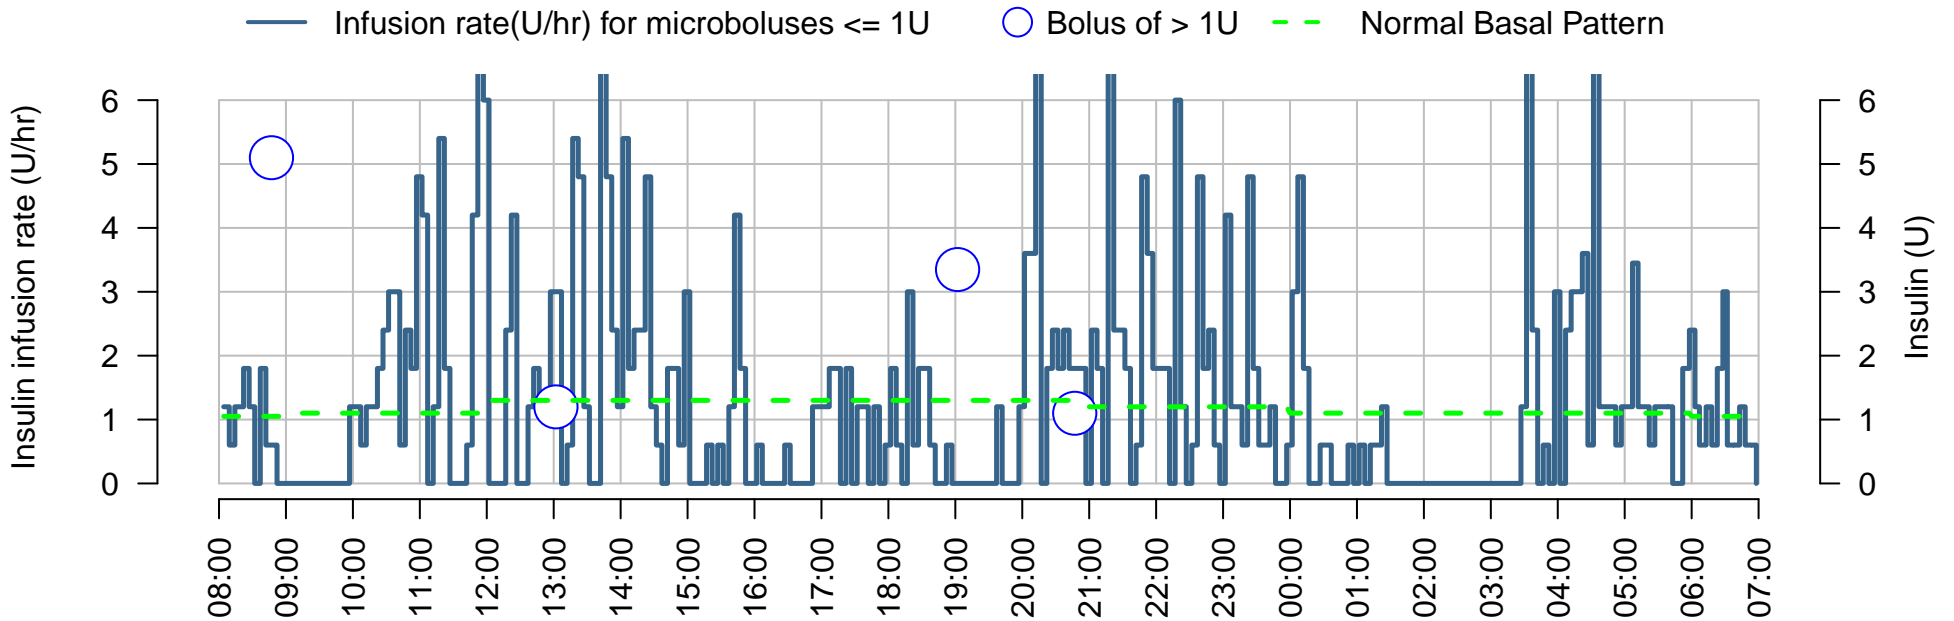

# Subject 5

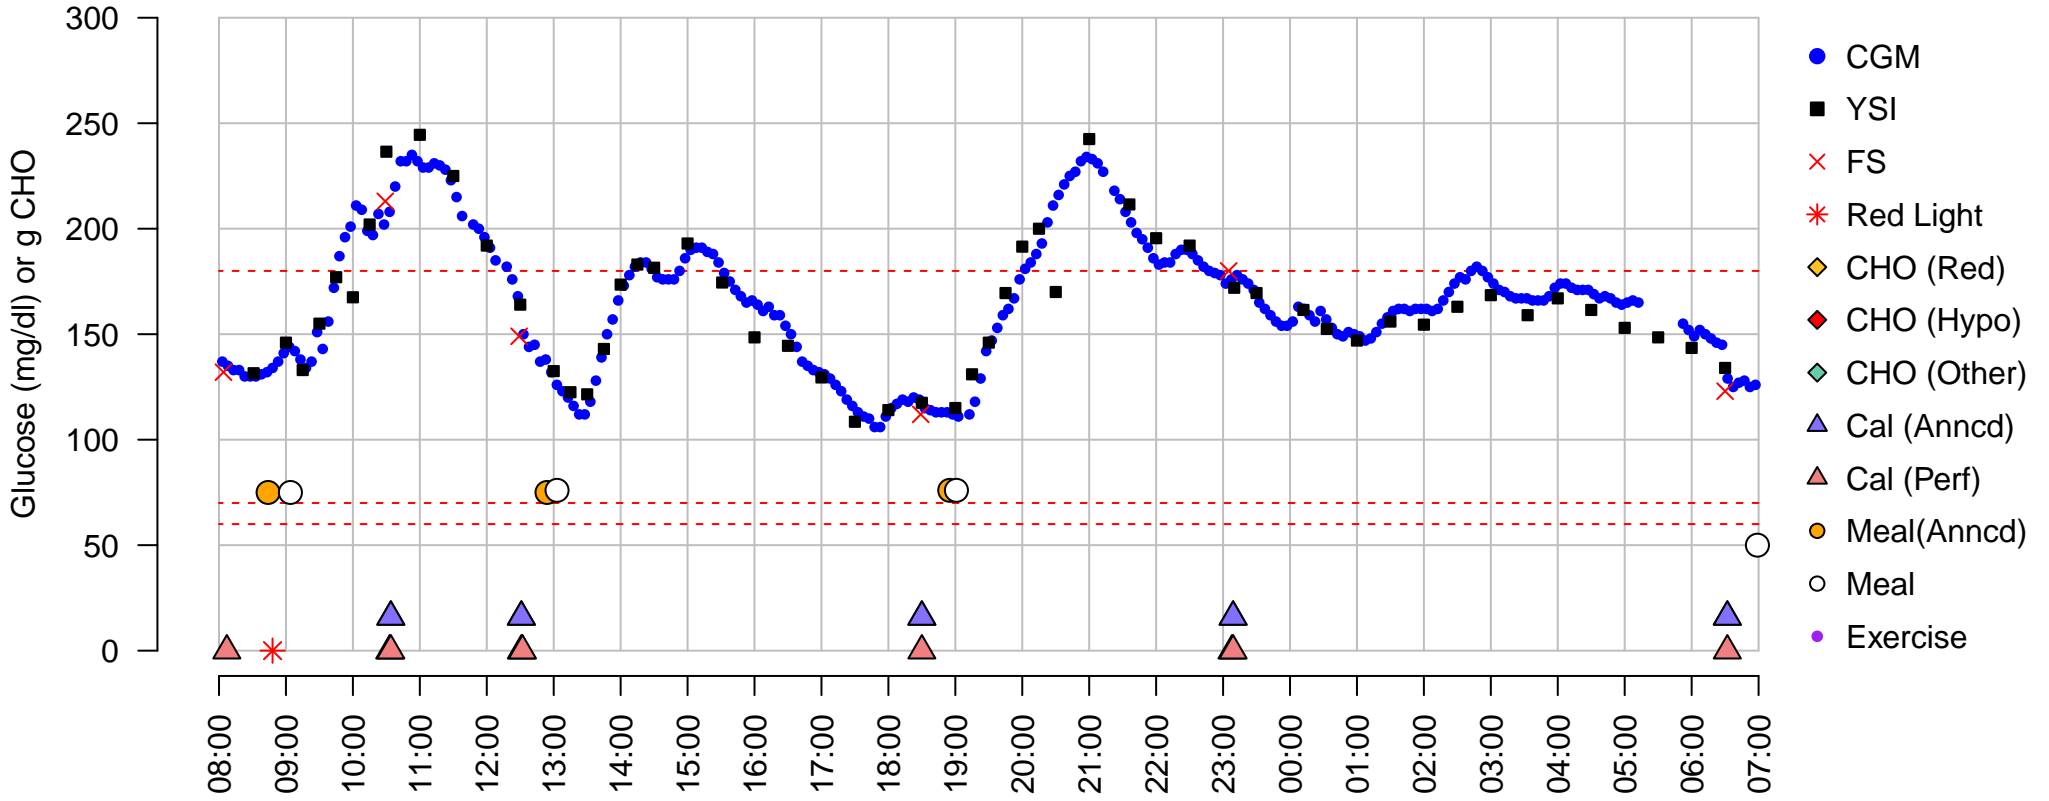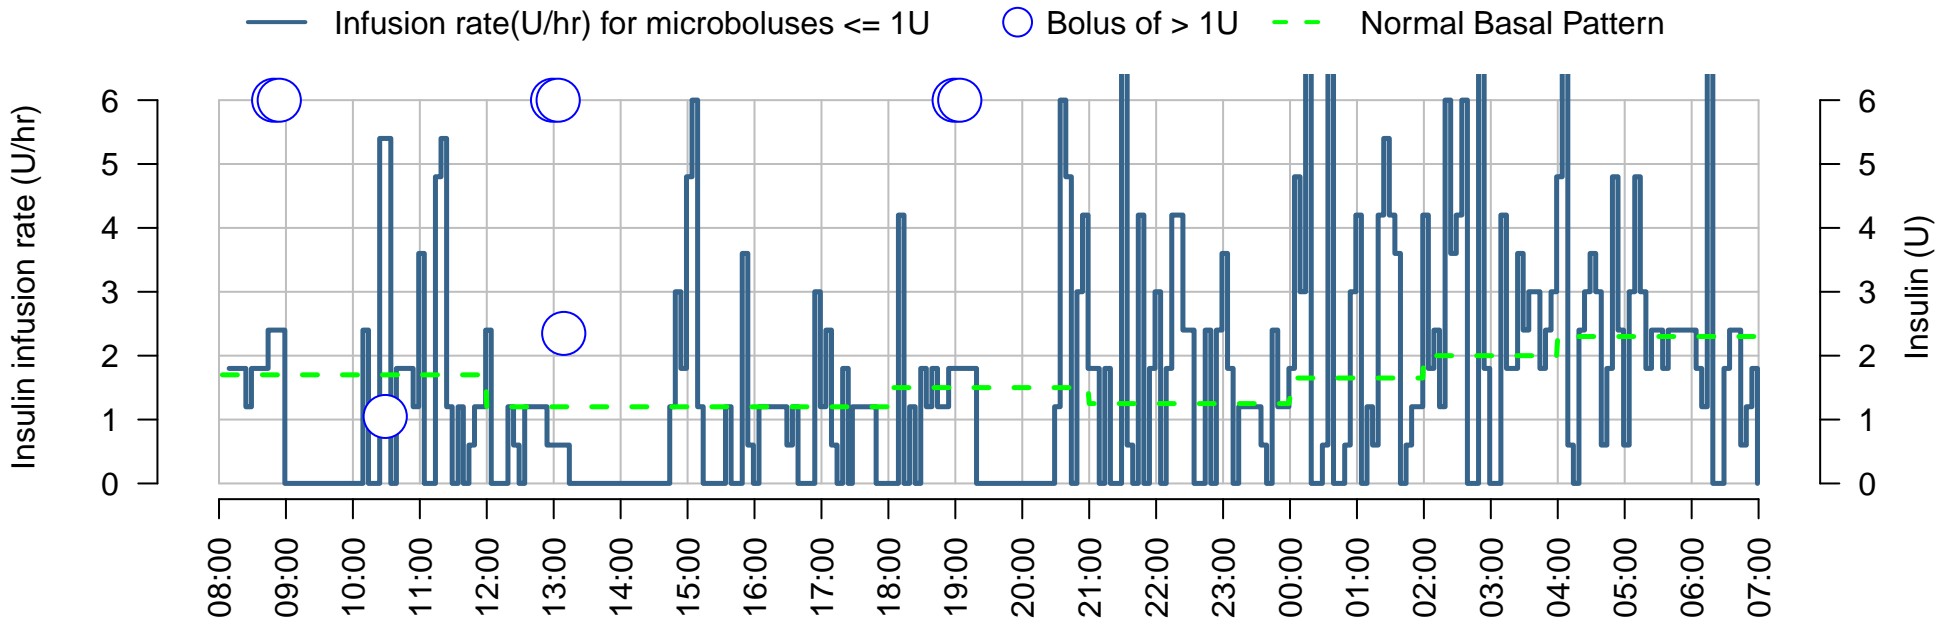

# Subject 6

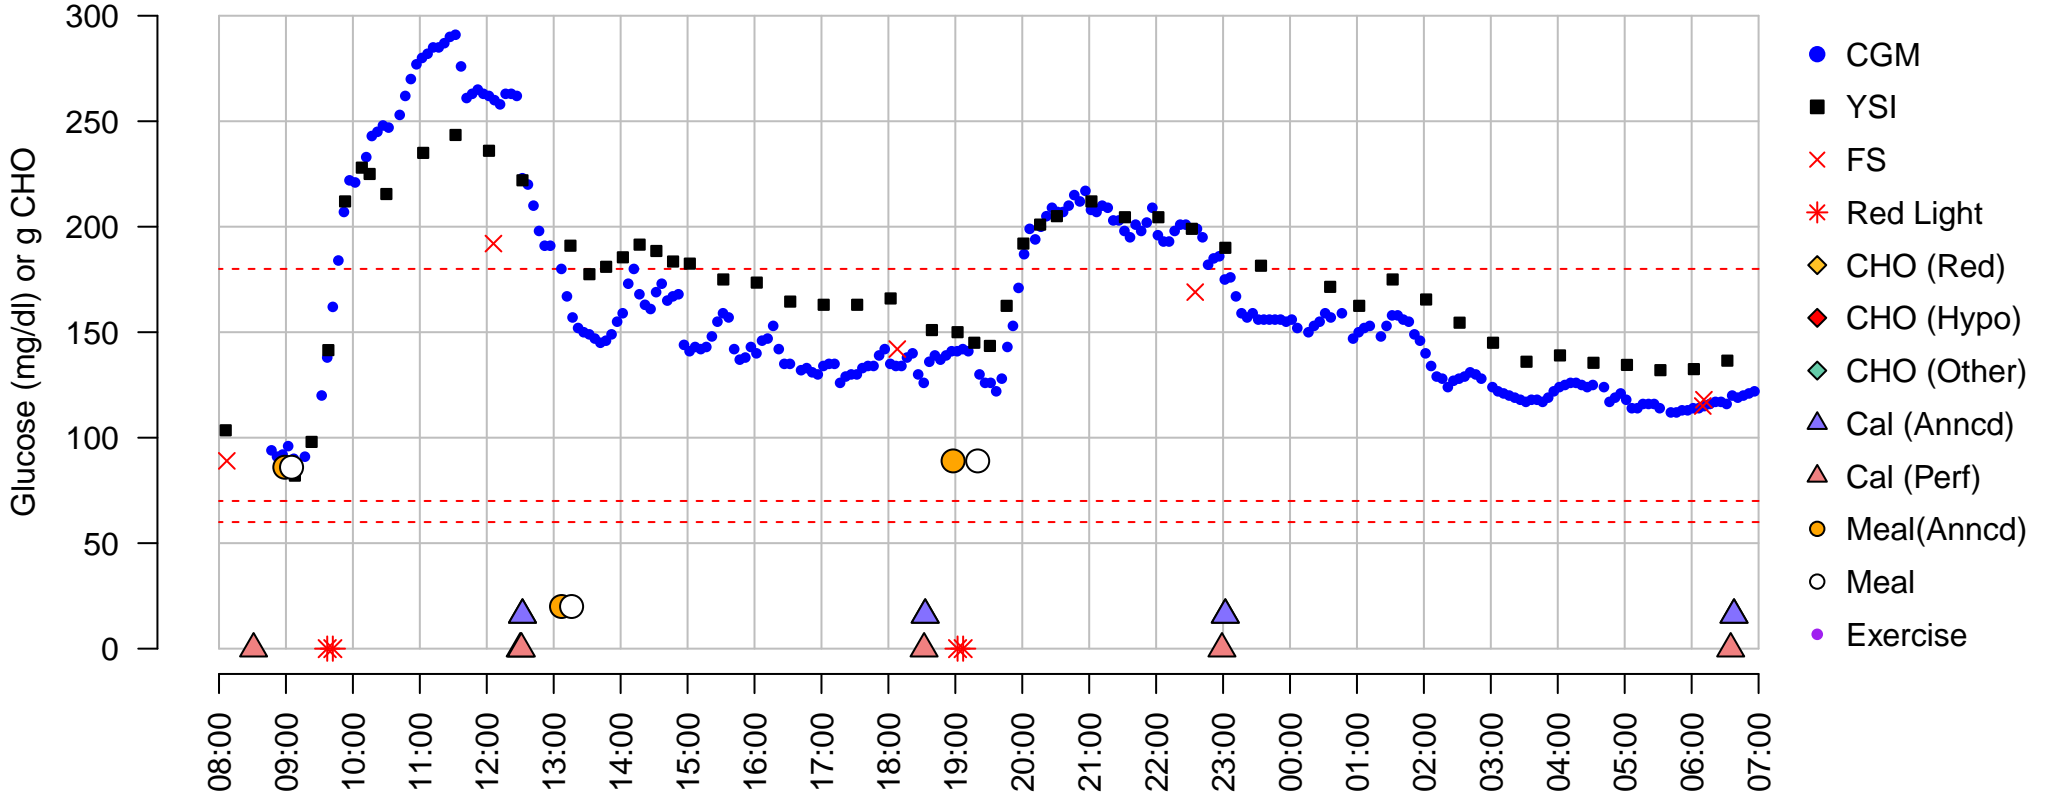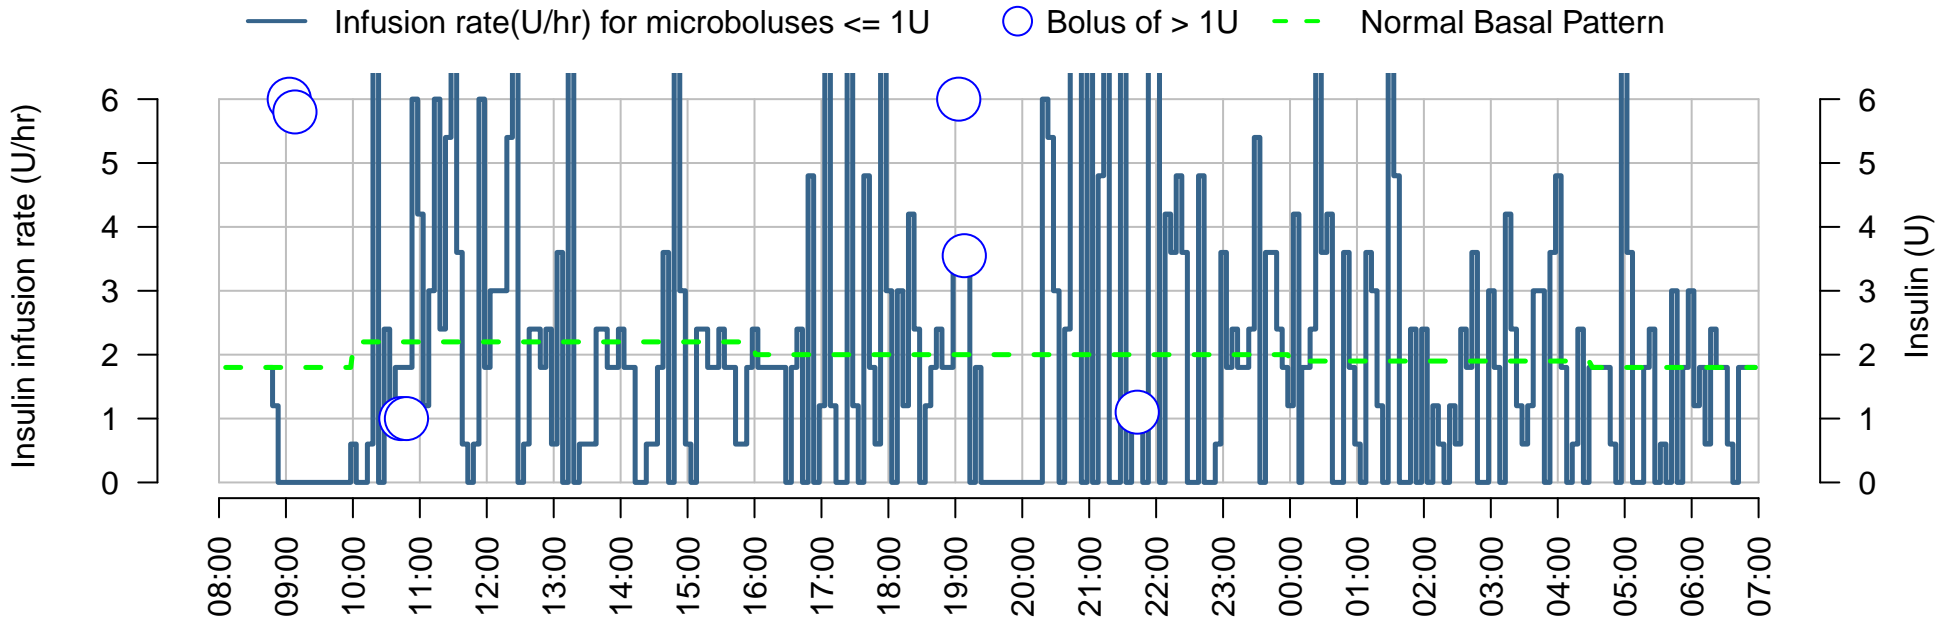

# Subject 7

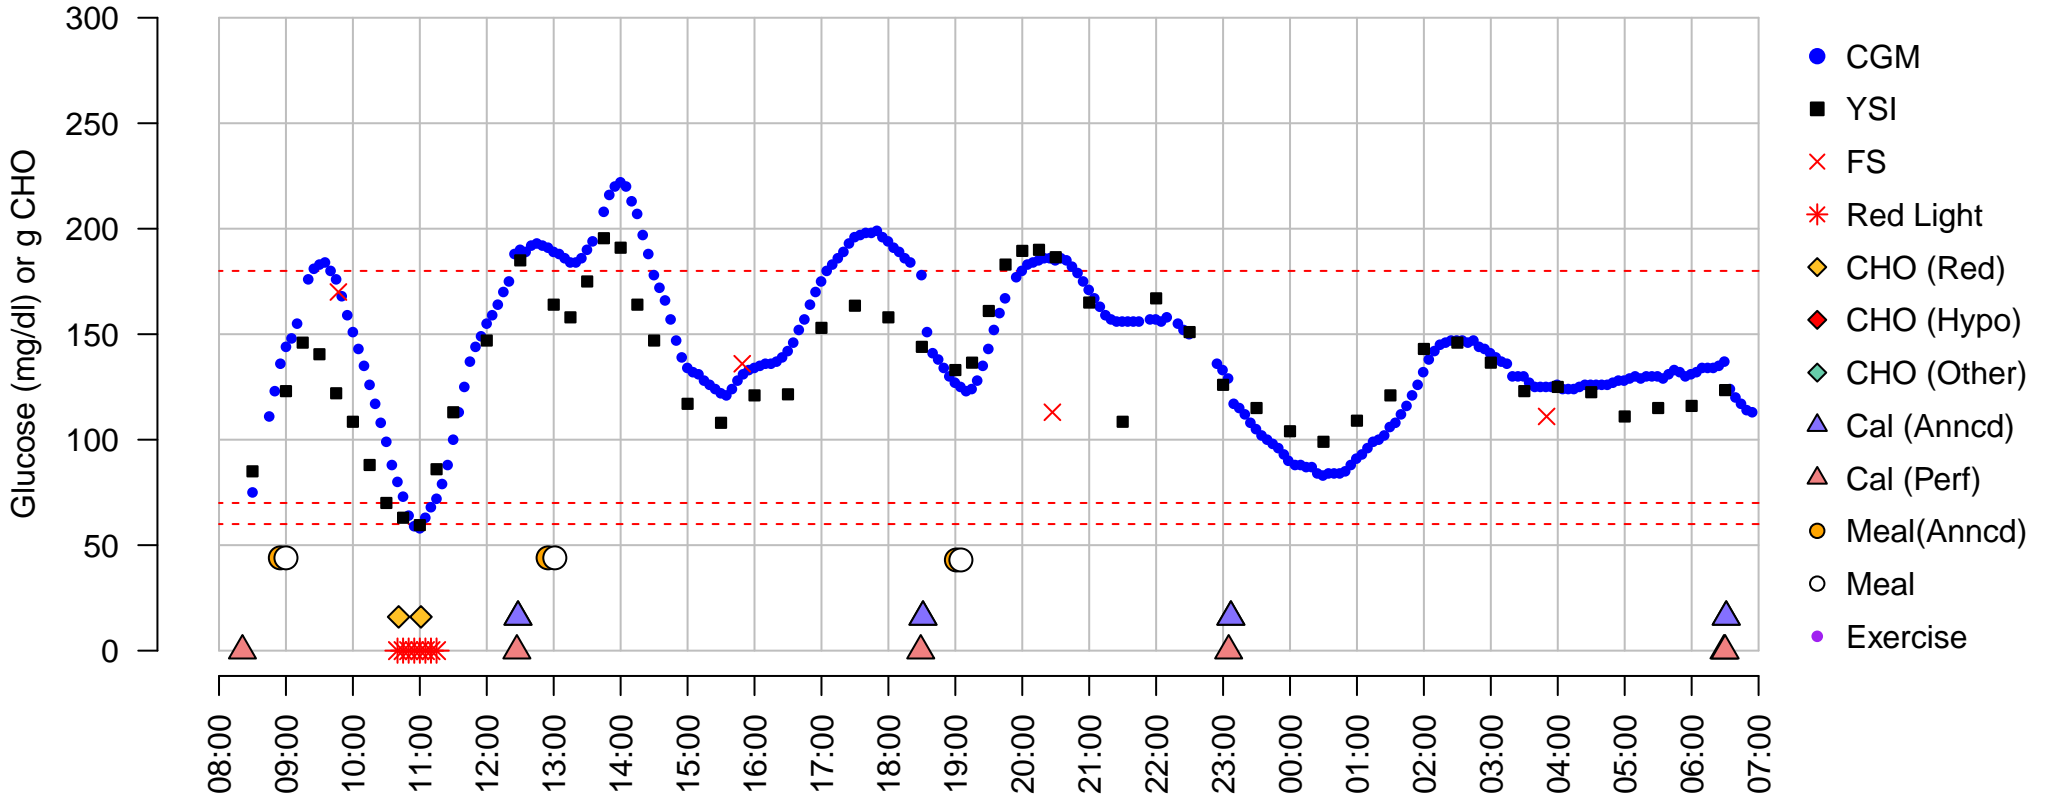

— Infusion rate(U/hr) for microboluses  $\leq 1$ U    ○ Bolus of  $> 1$ U    - - - Normal Basal Pattern

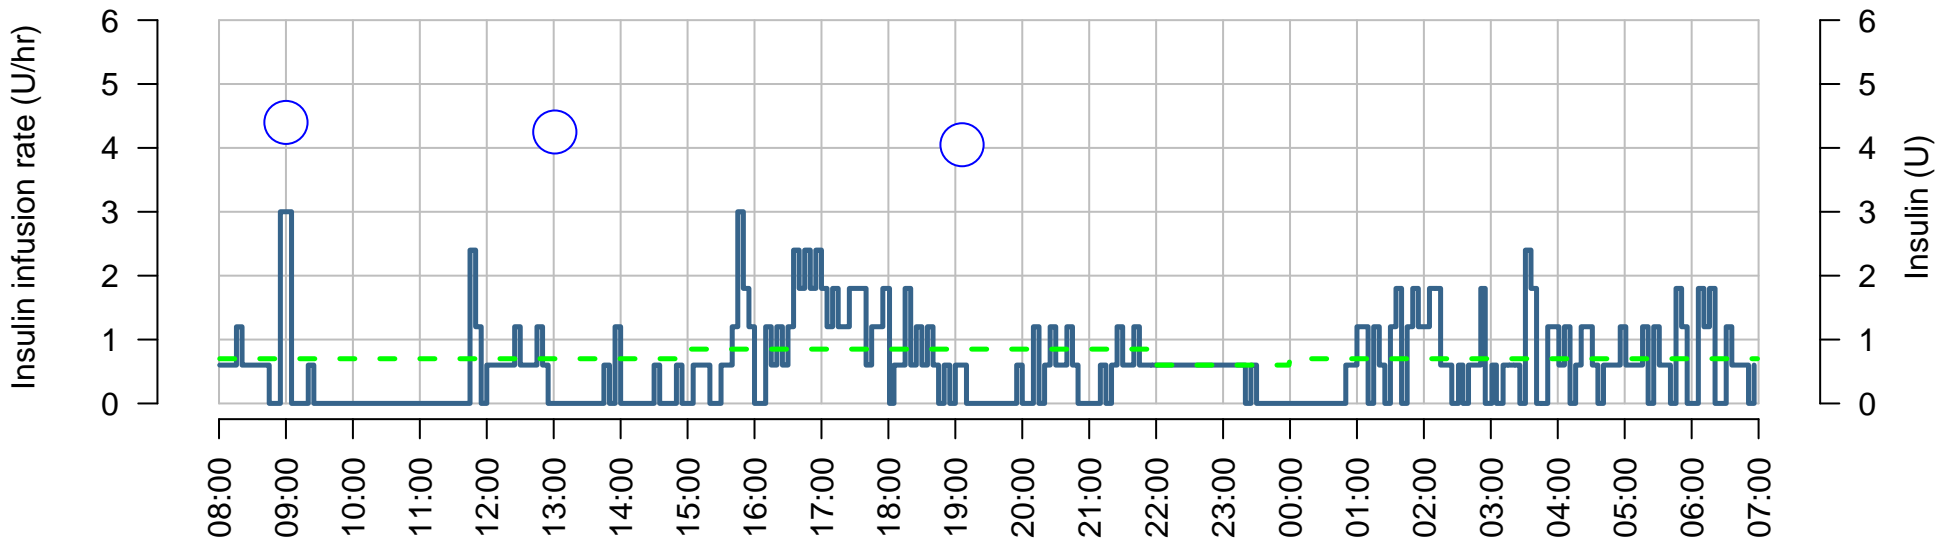



# Subject 8

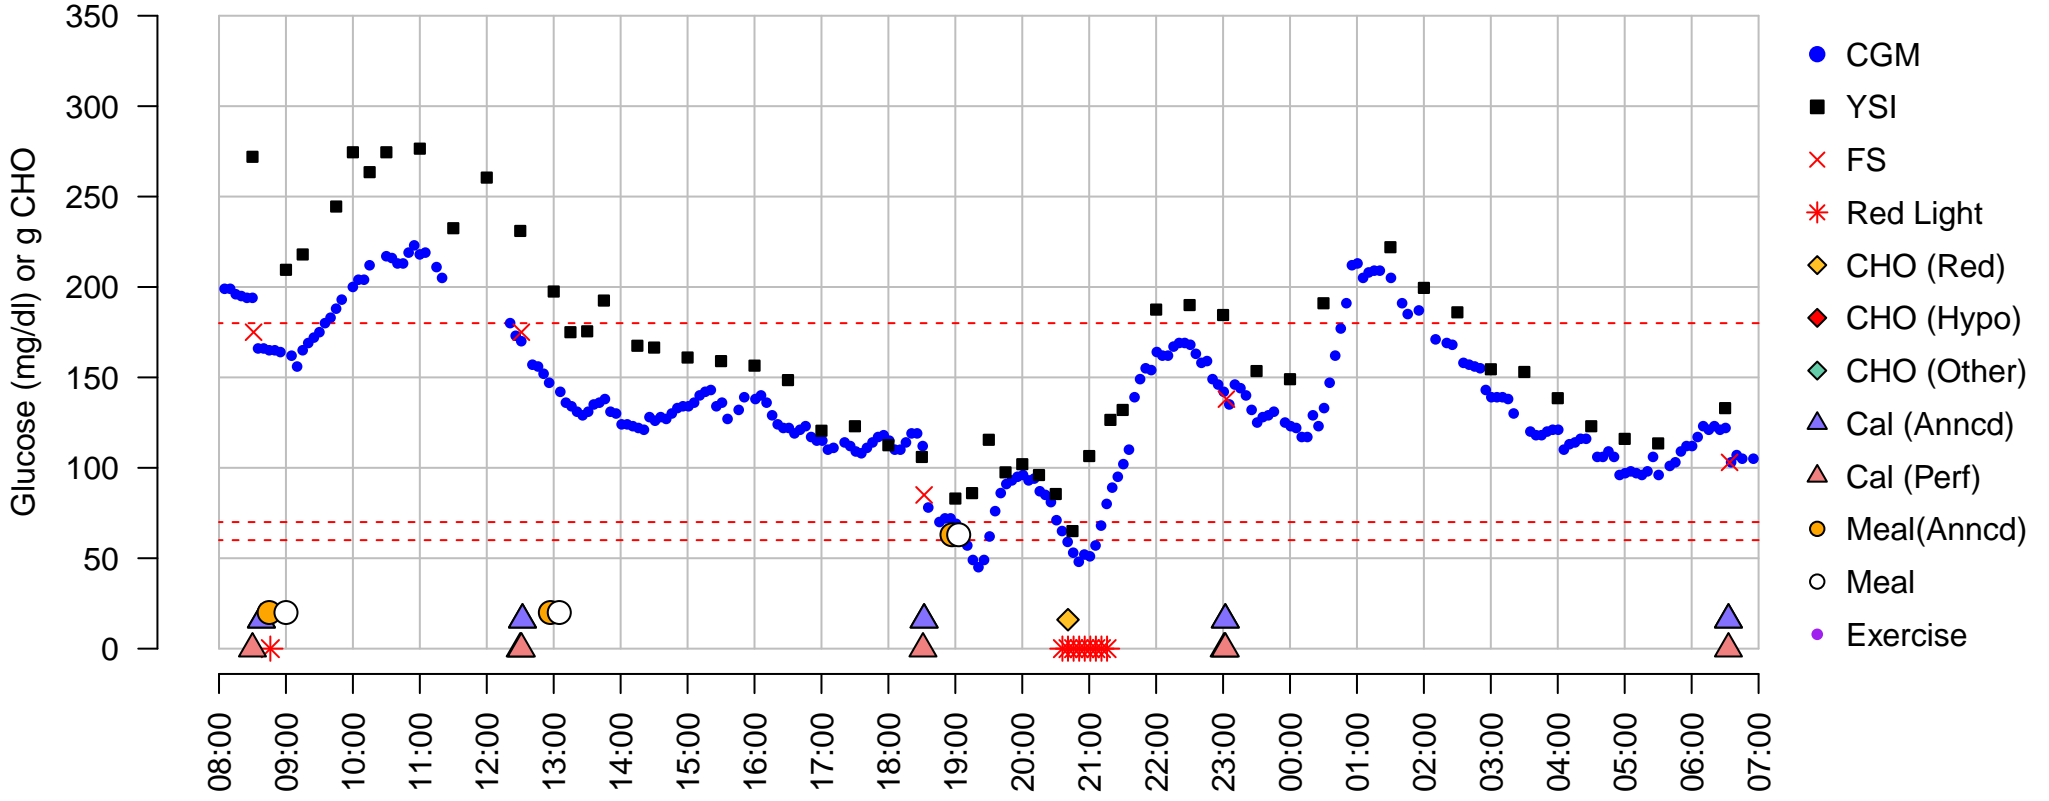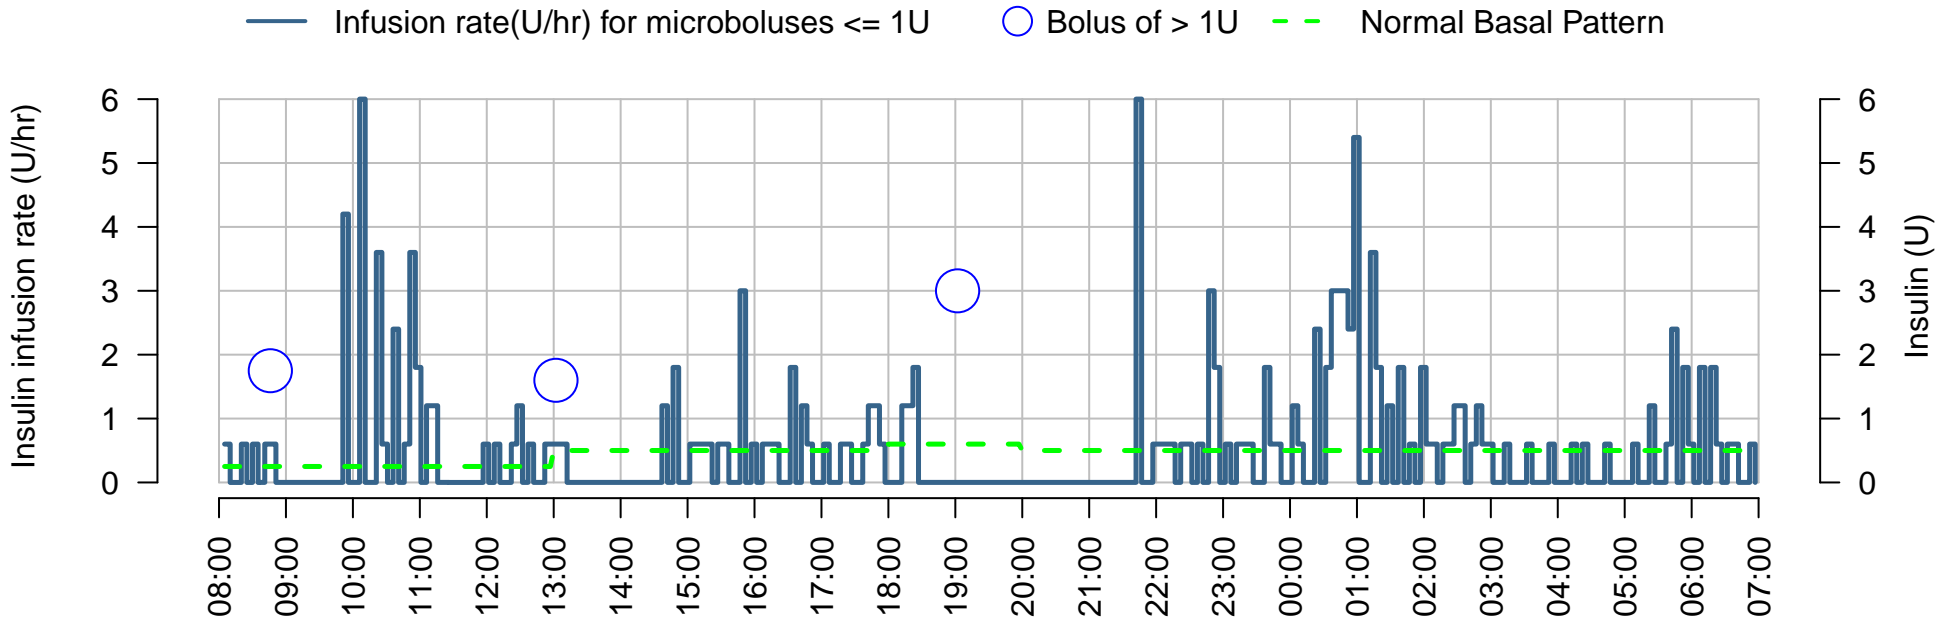

# Subject 9

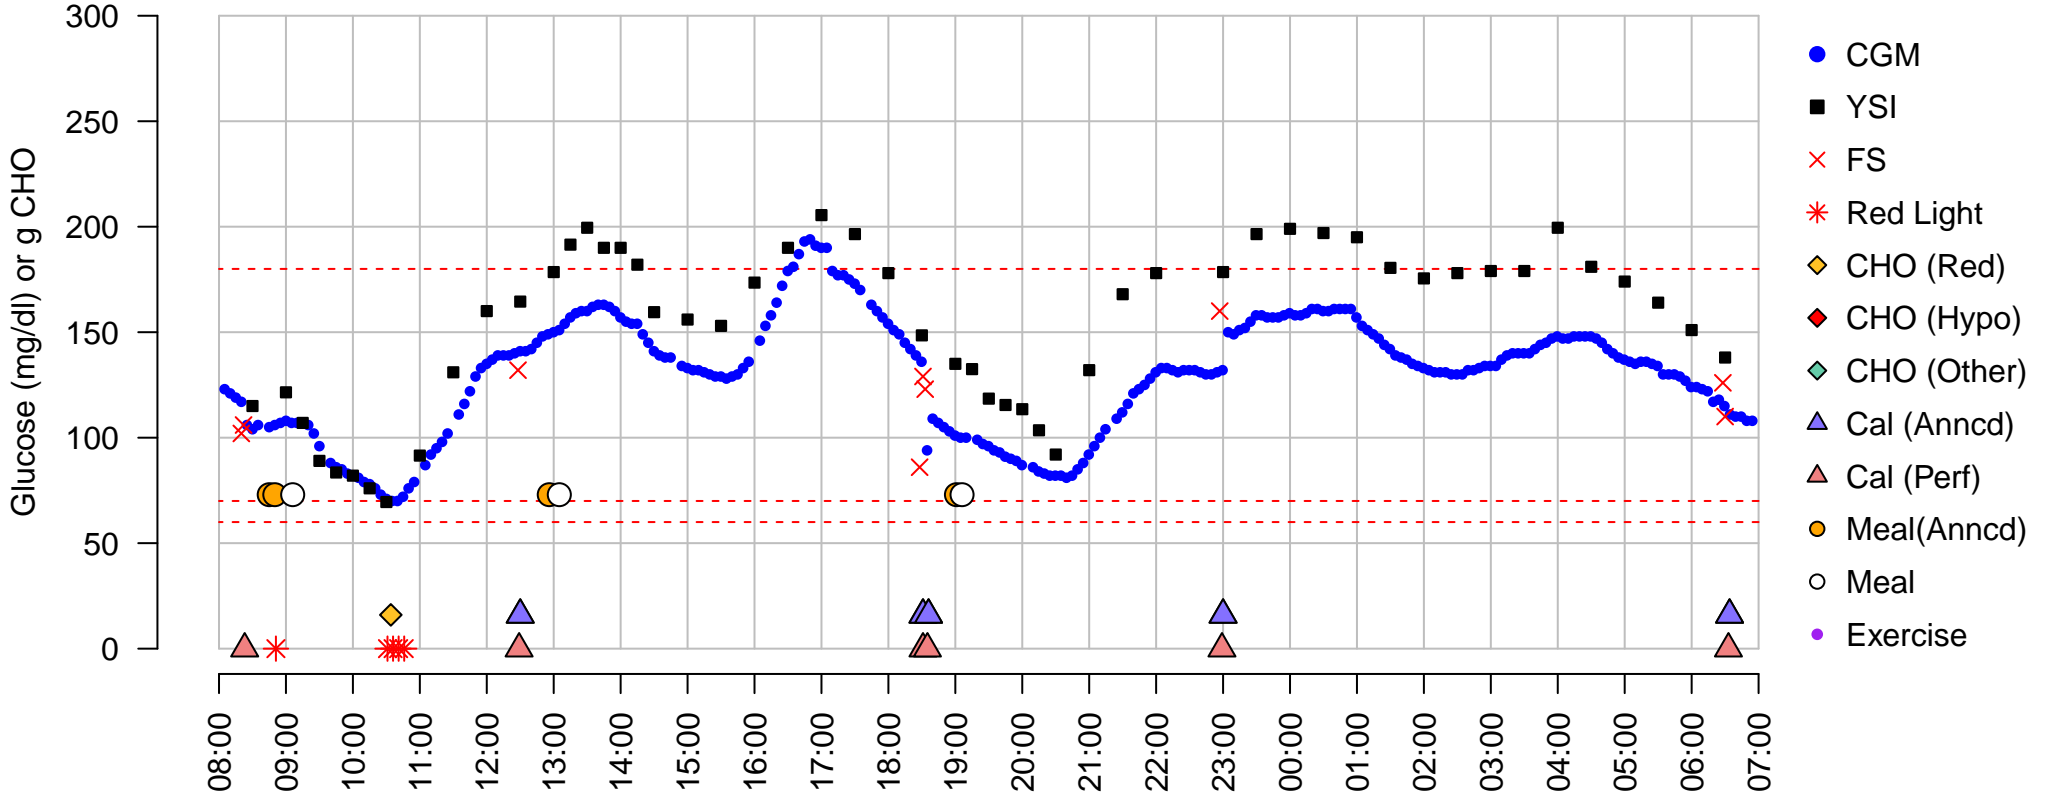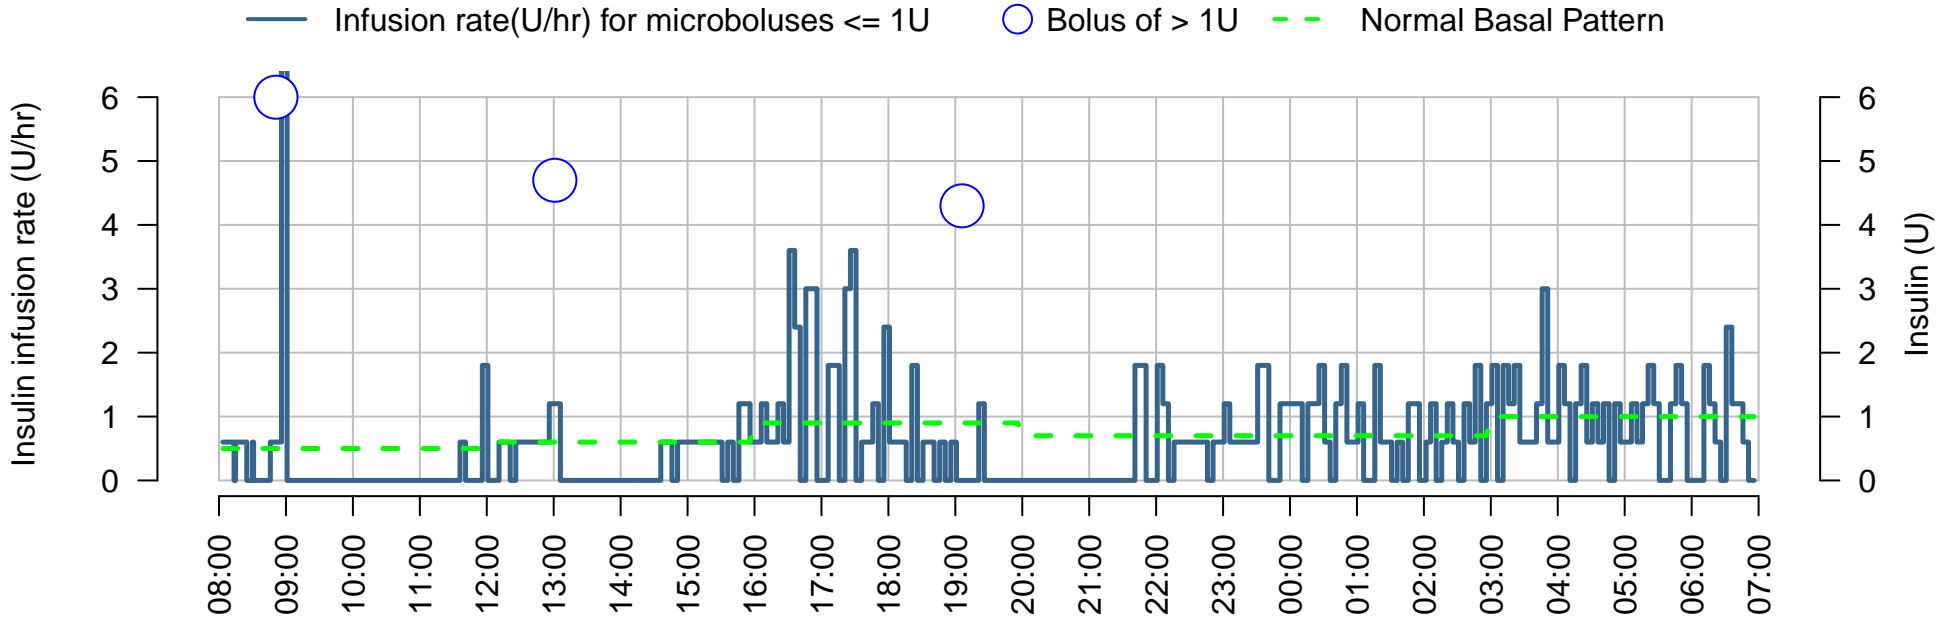

# Subject 10

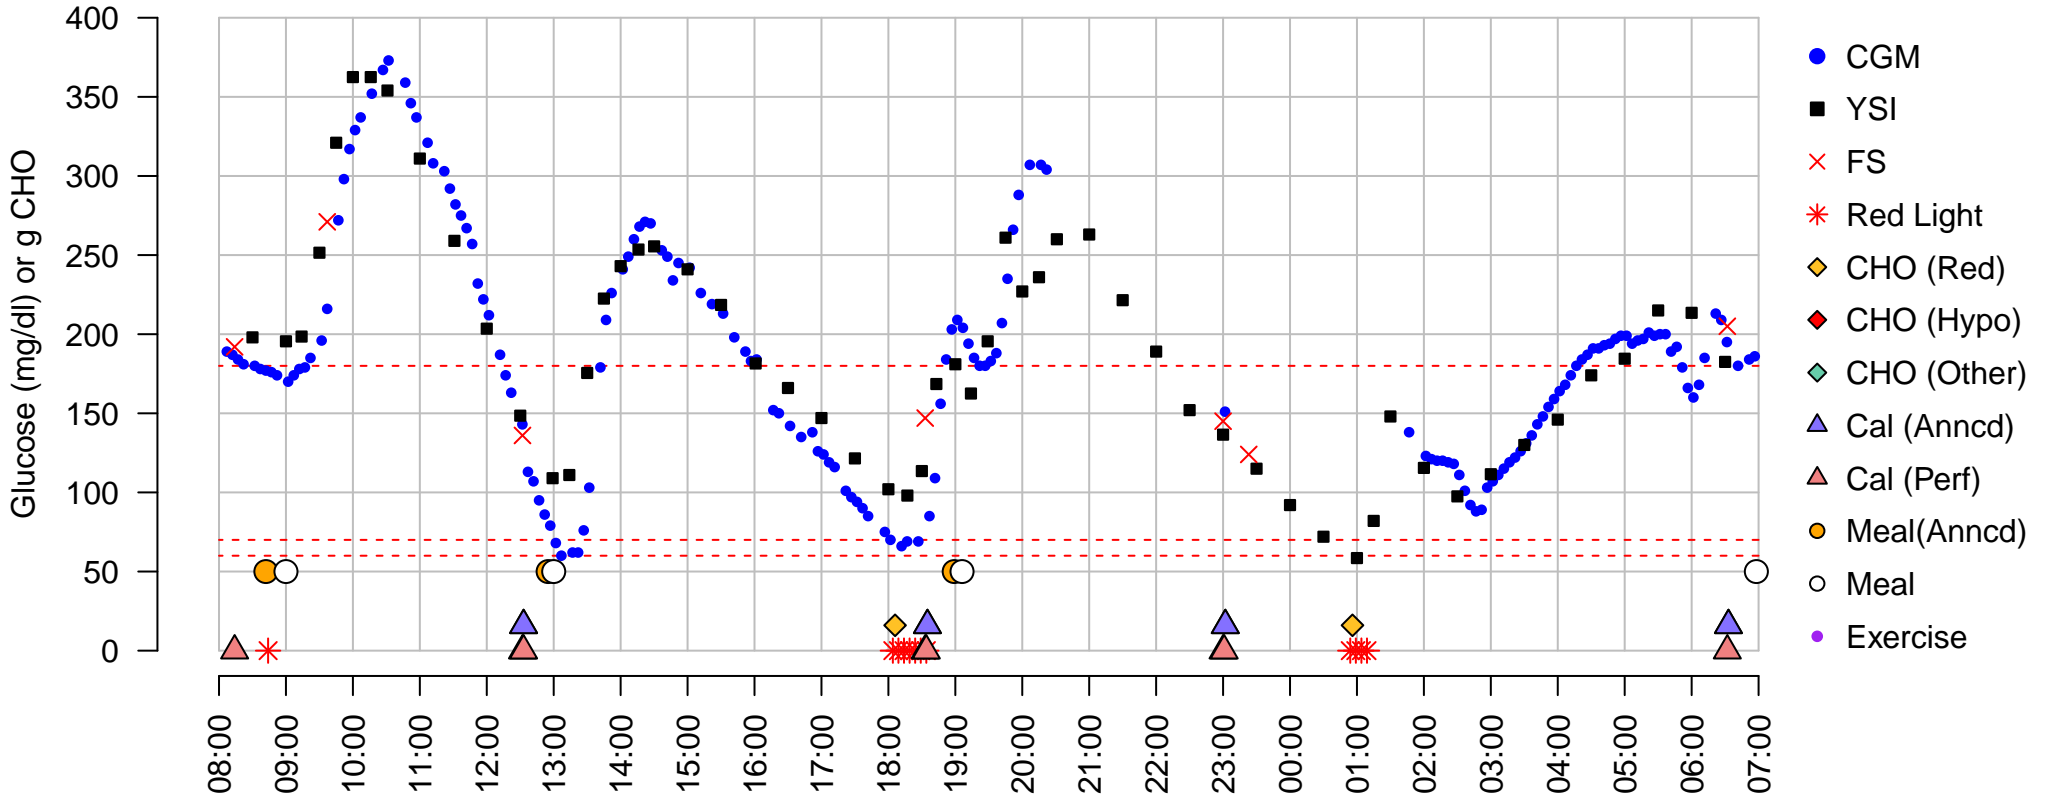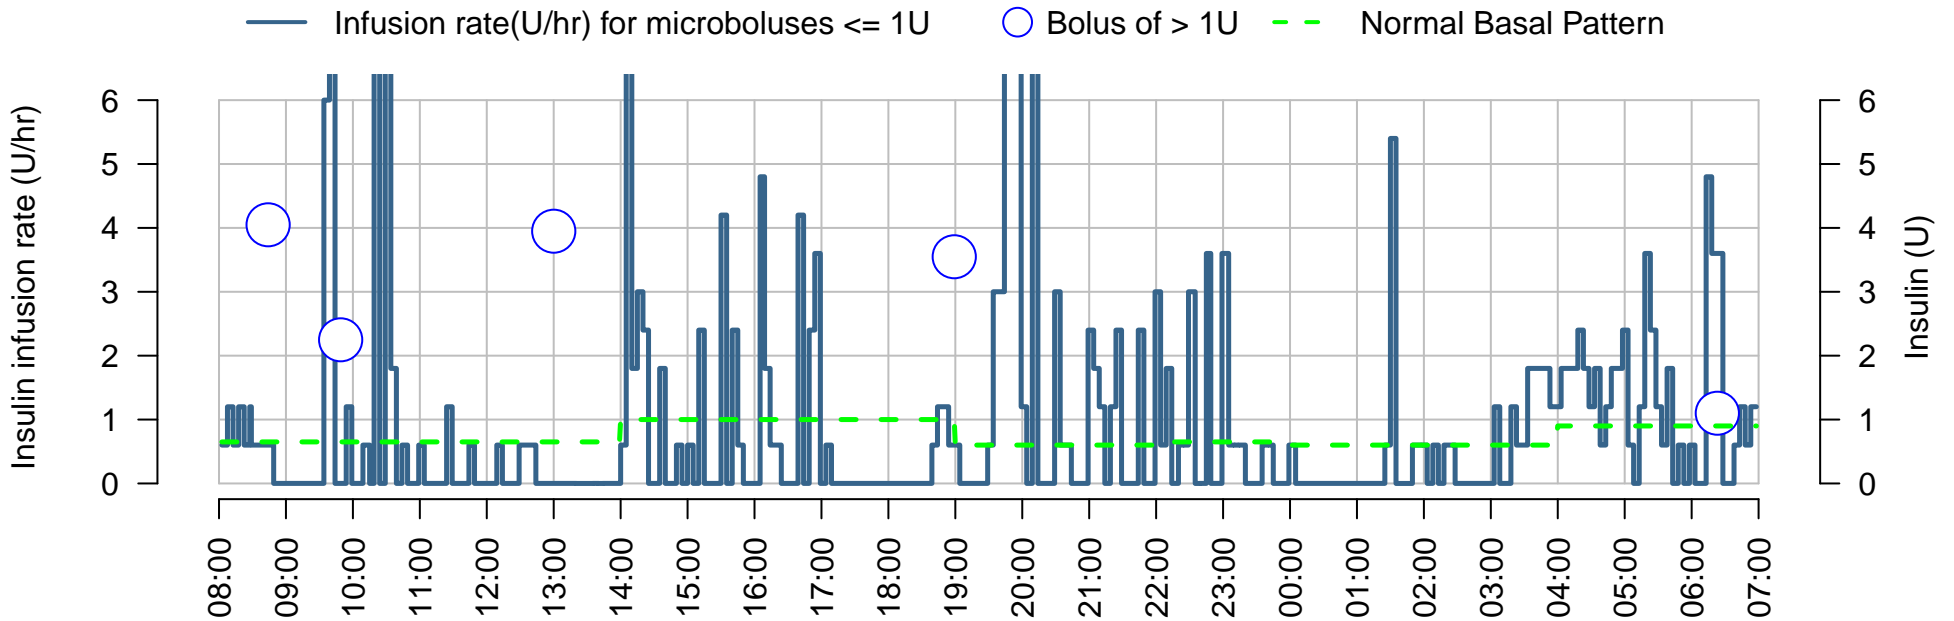

# Subject 11

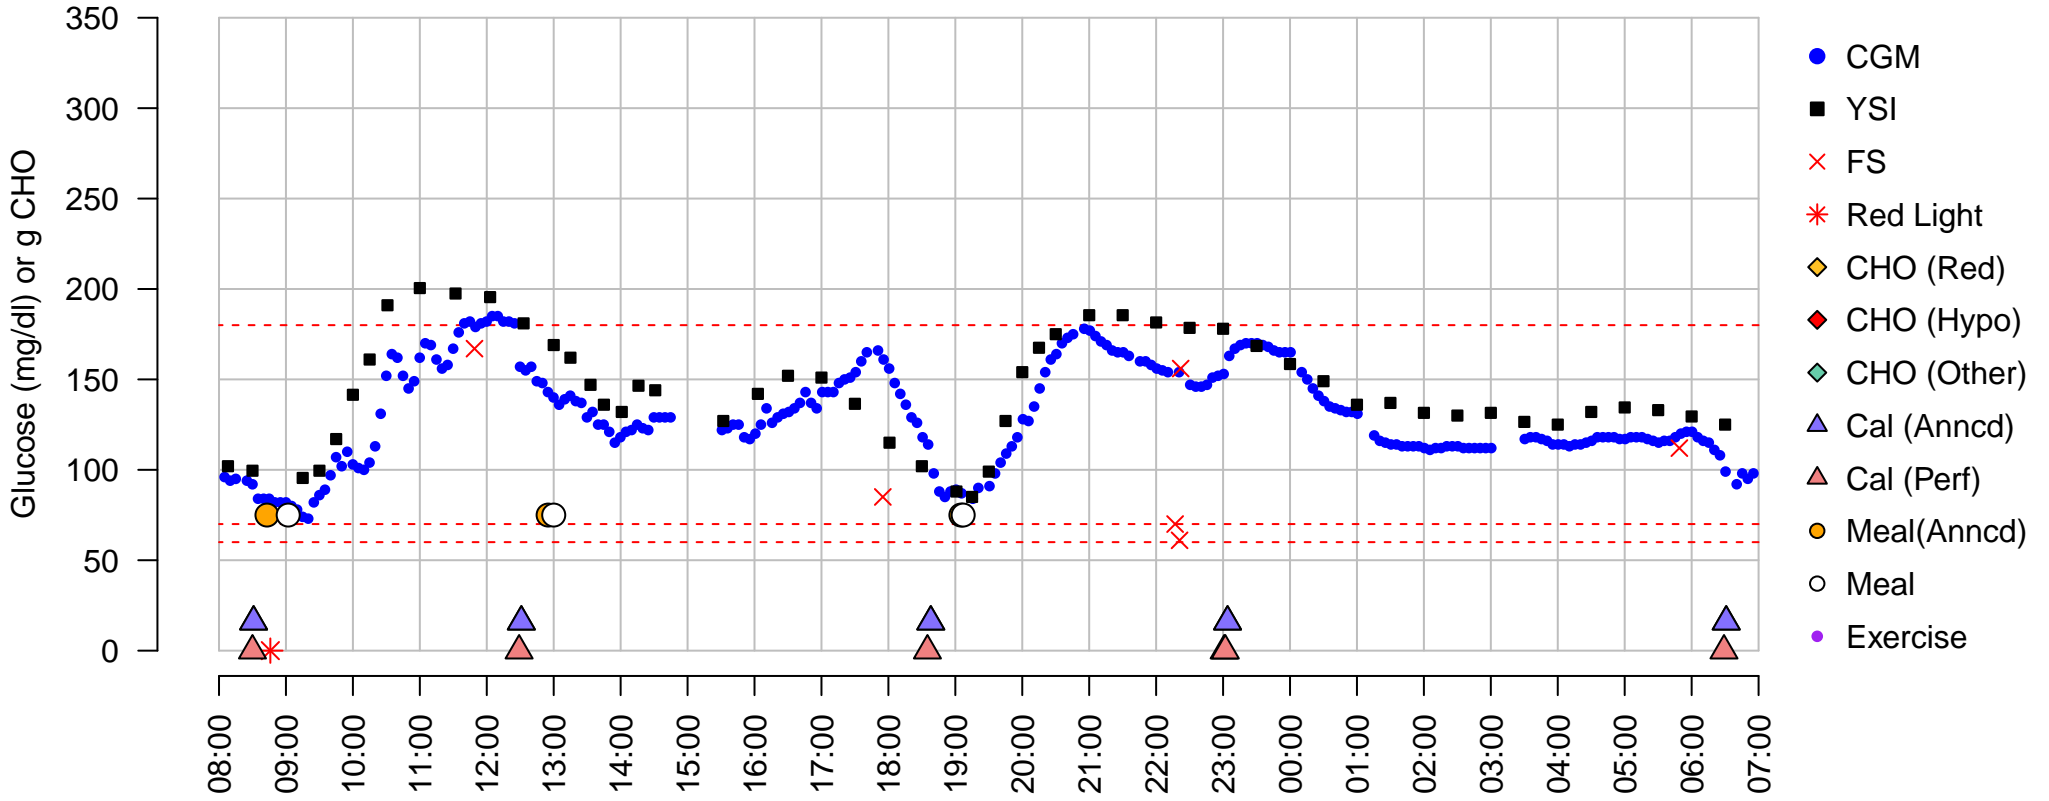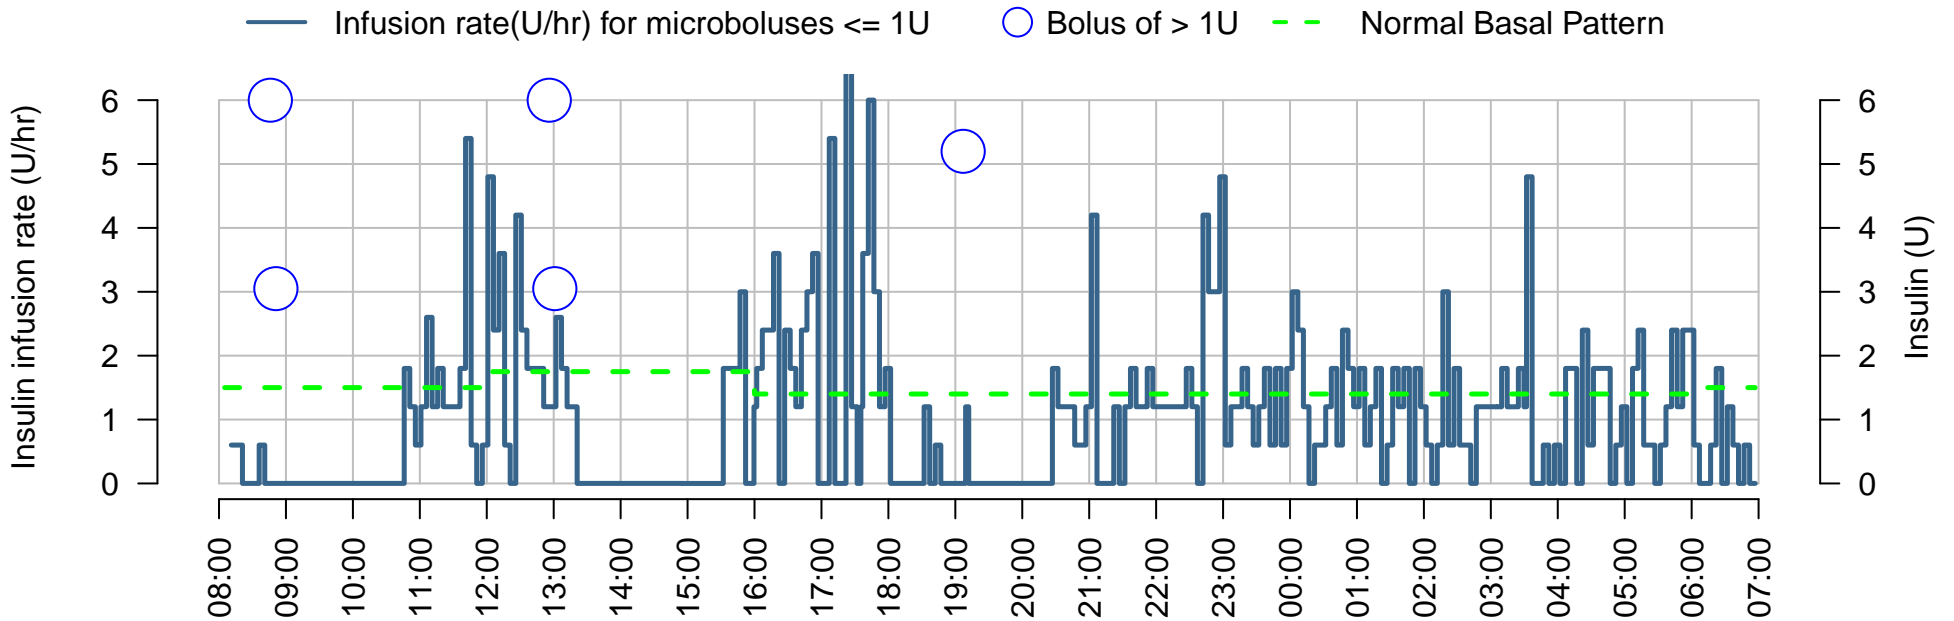

# Subject 12

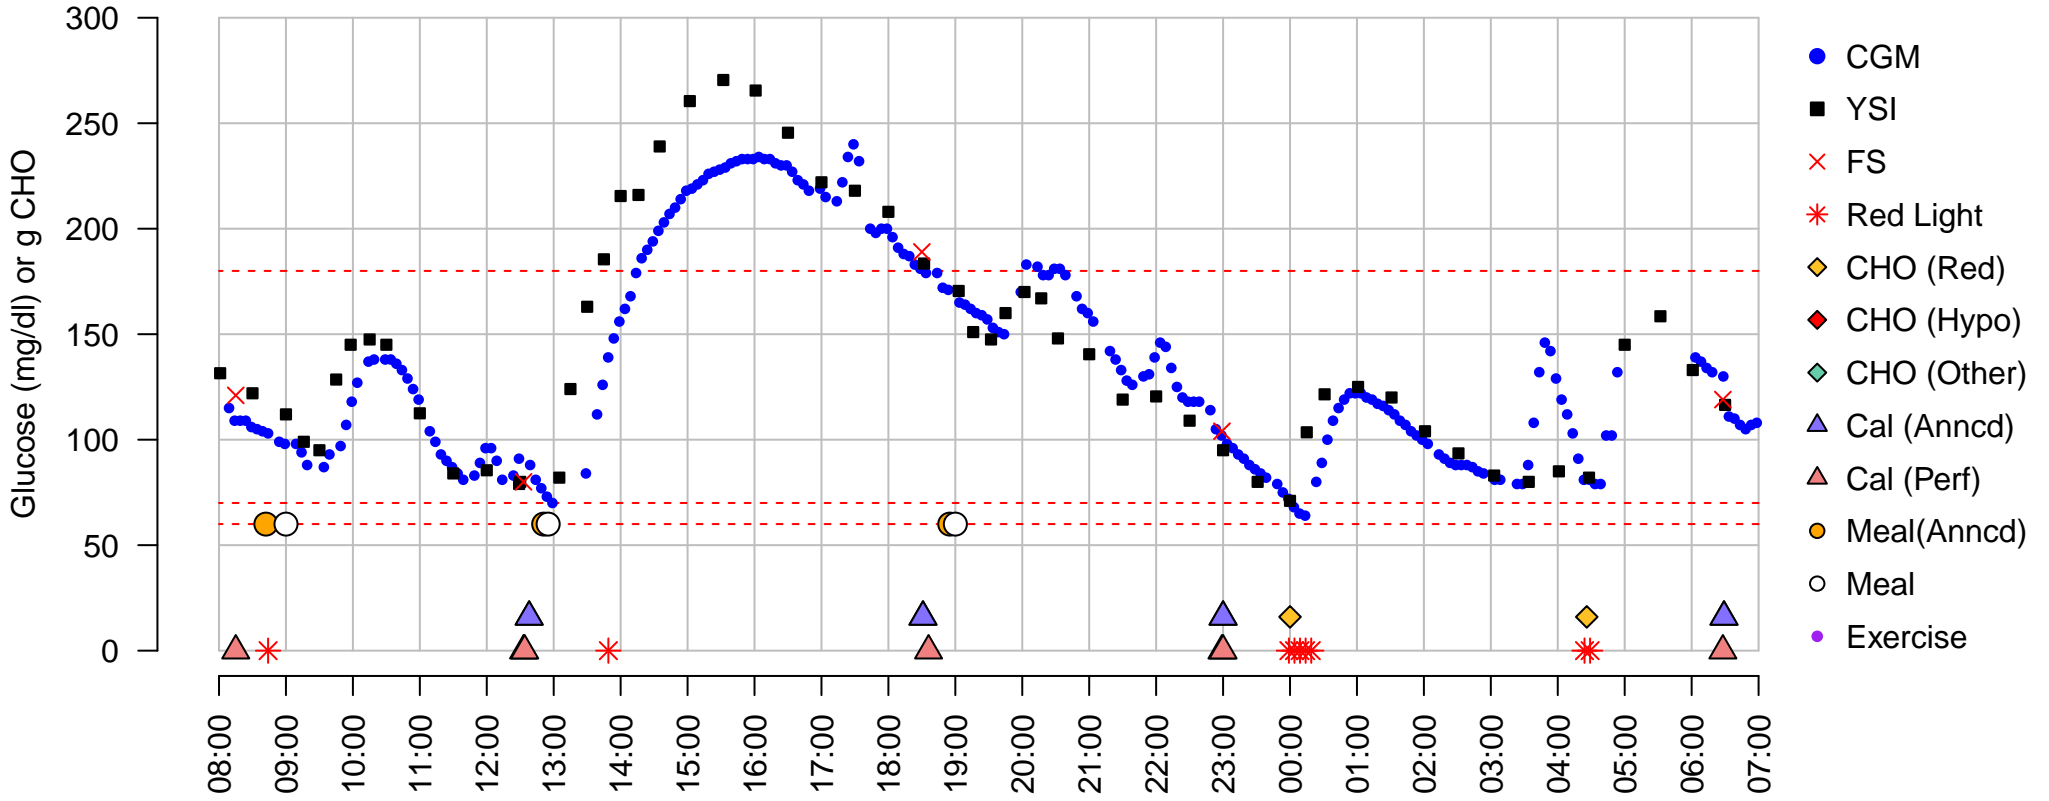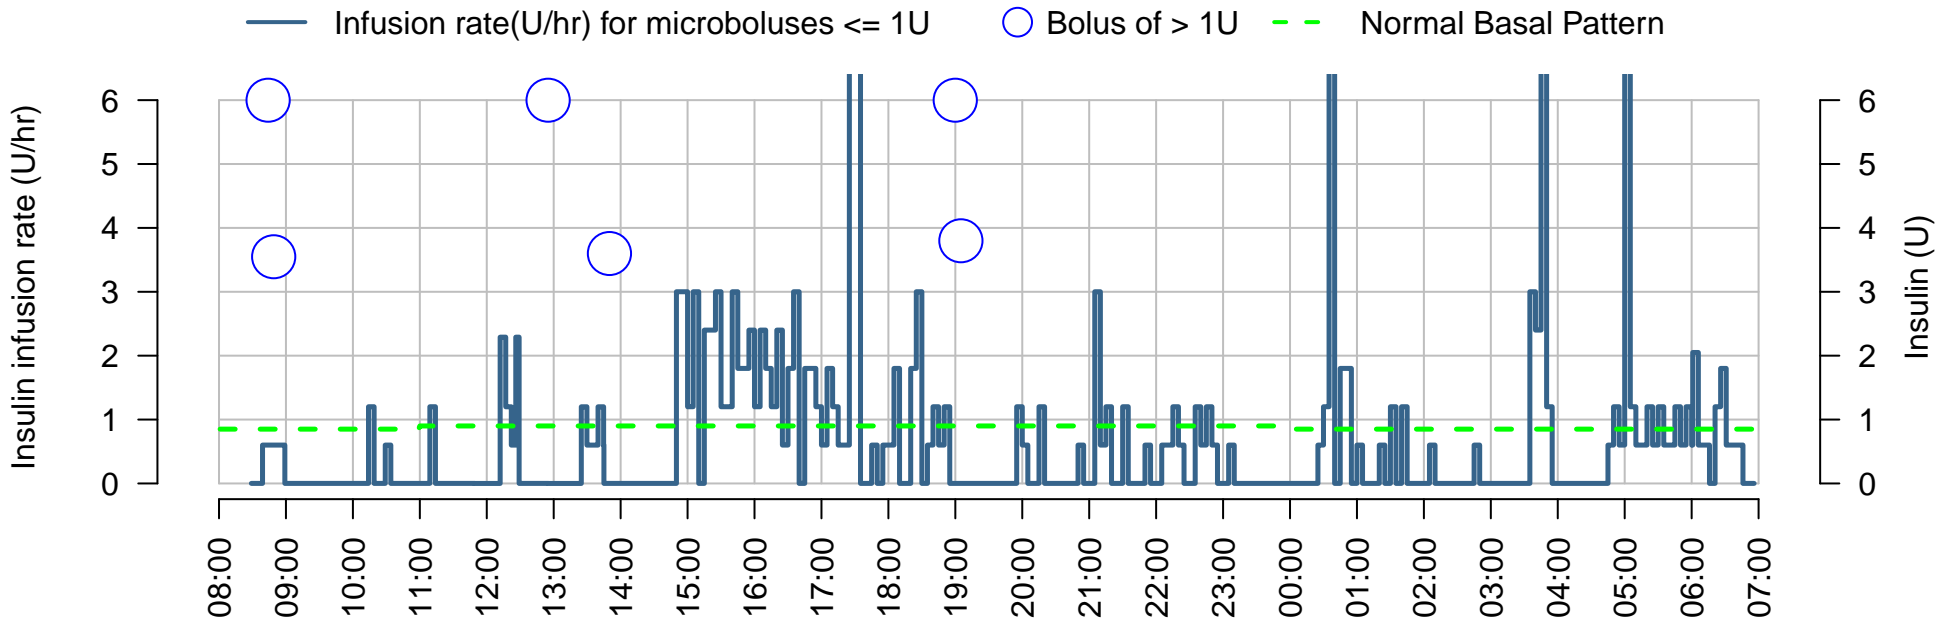

# Subject 13

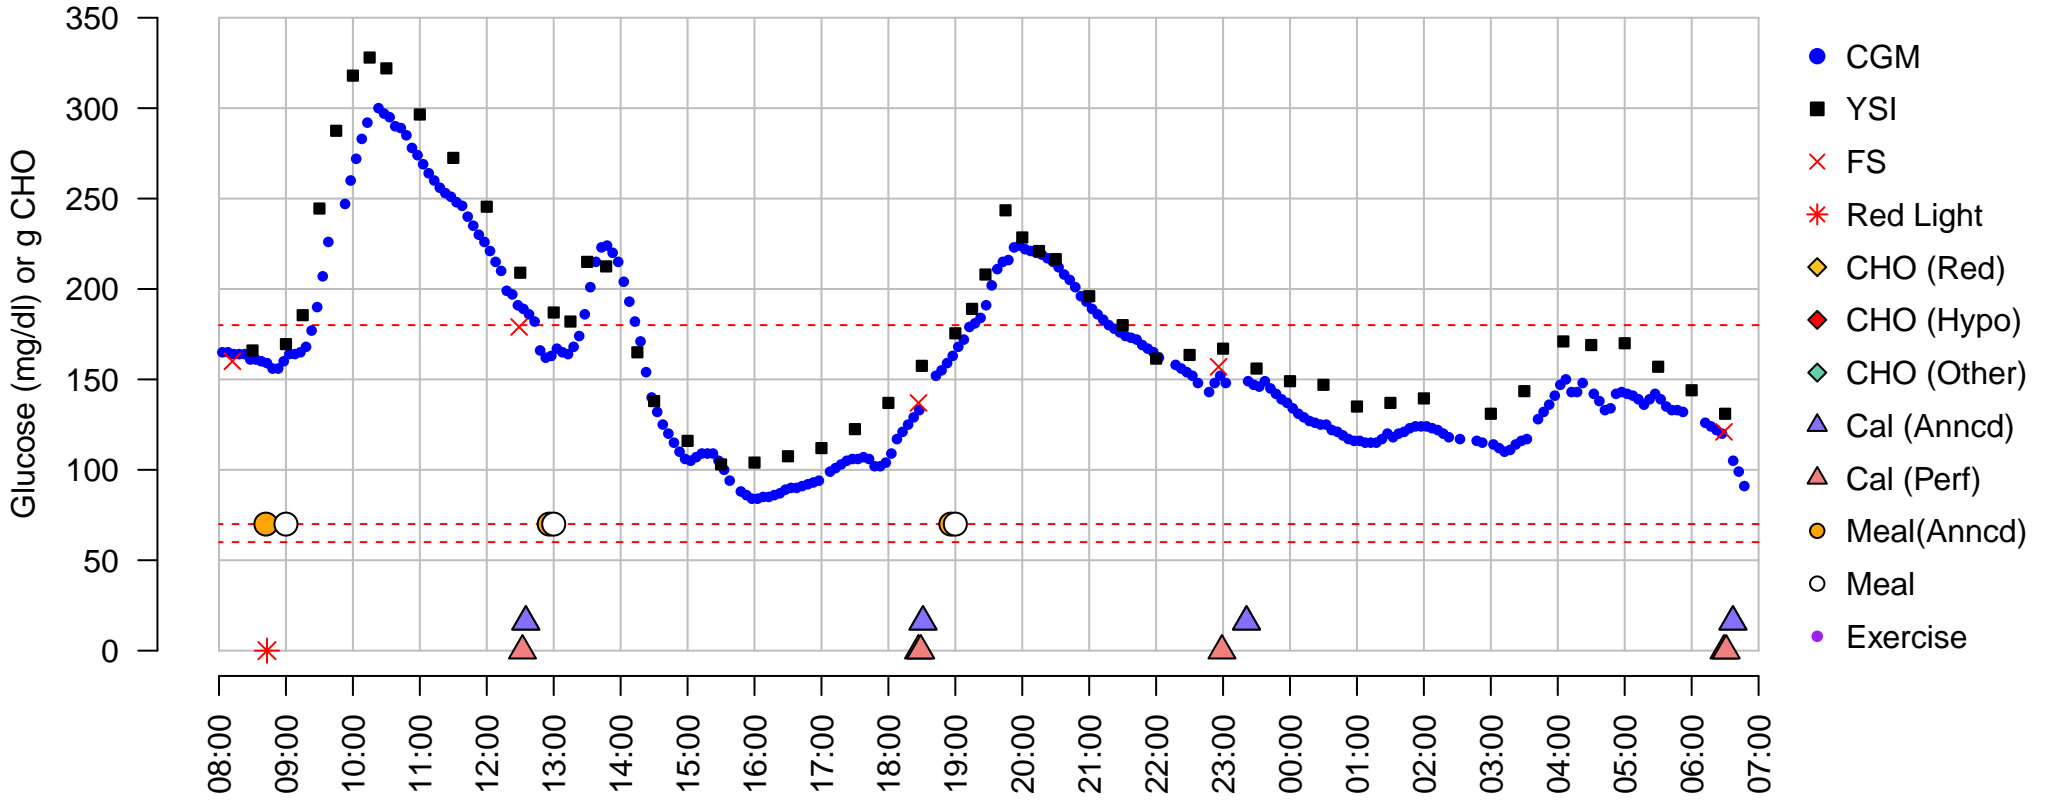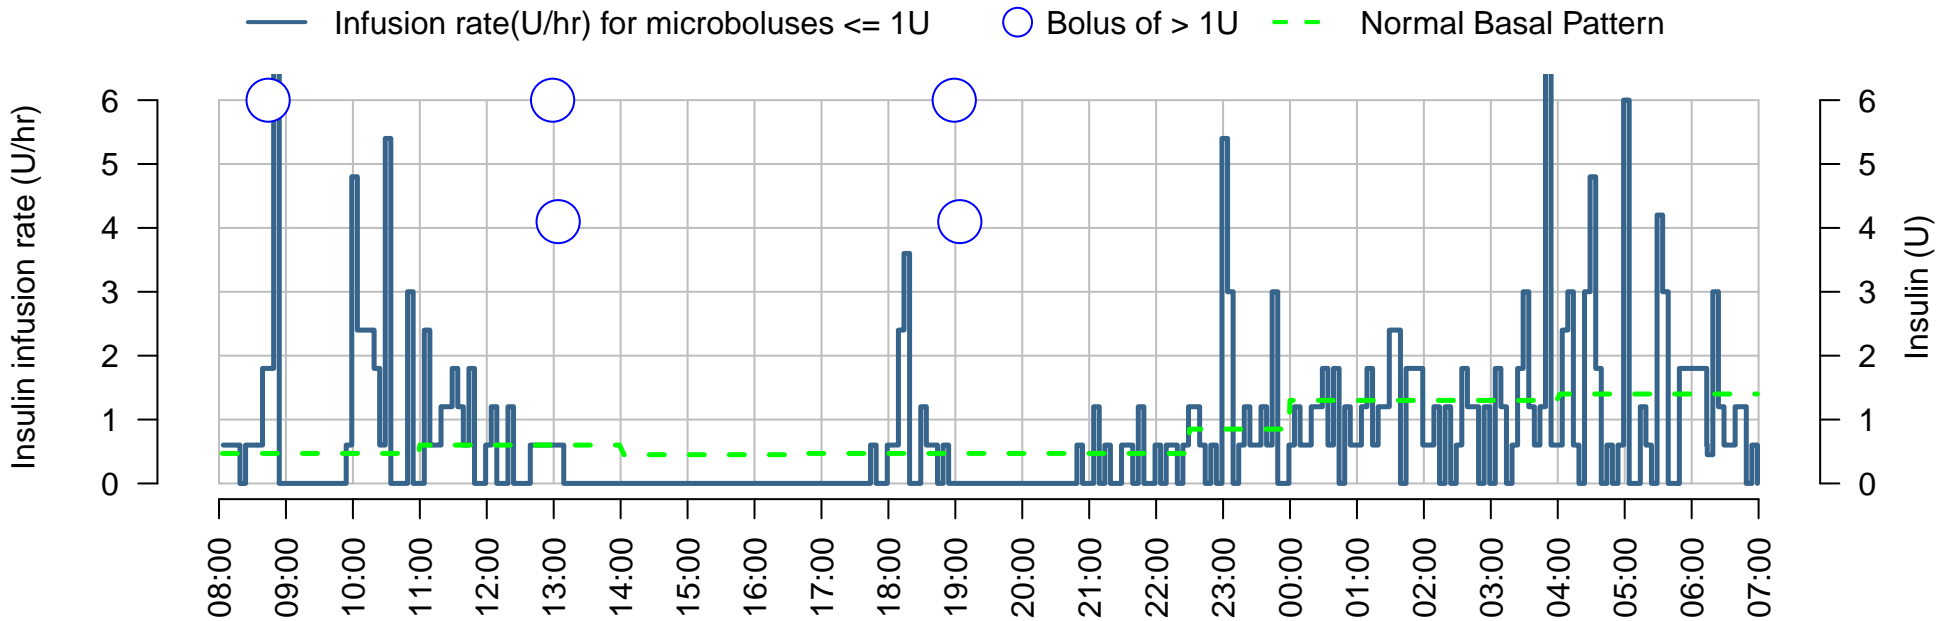

# Subject 14

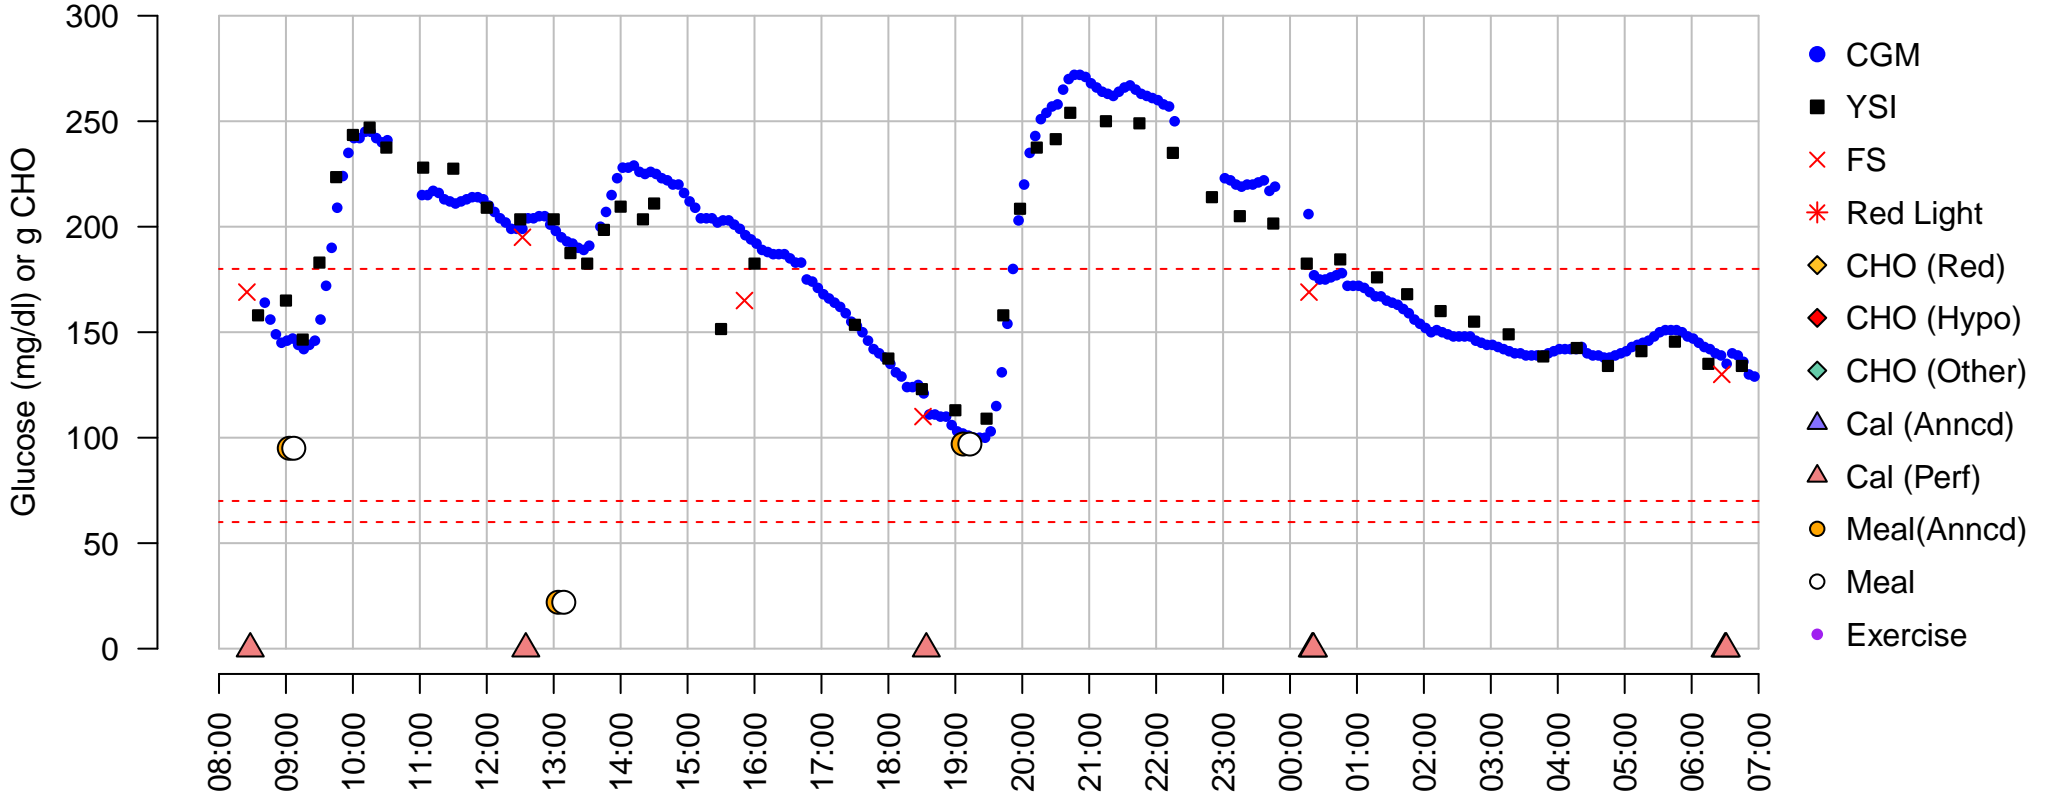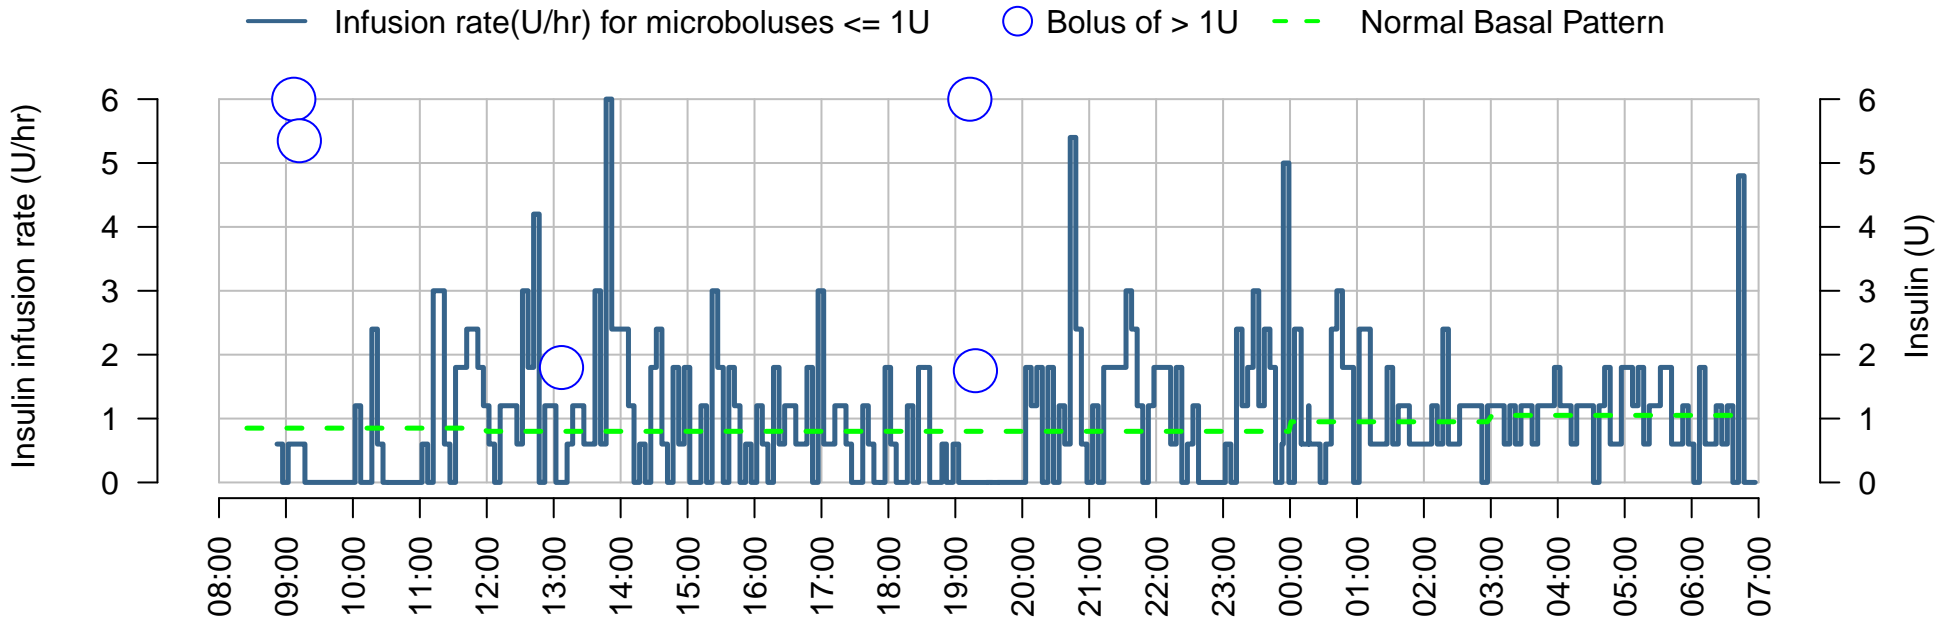

# Subject 15

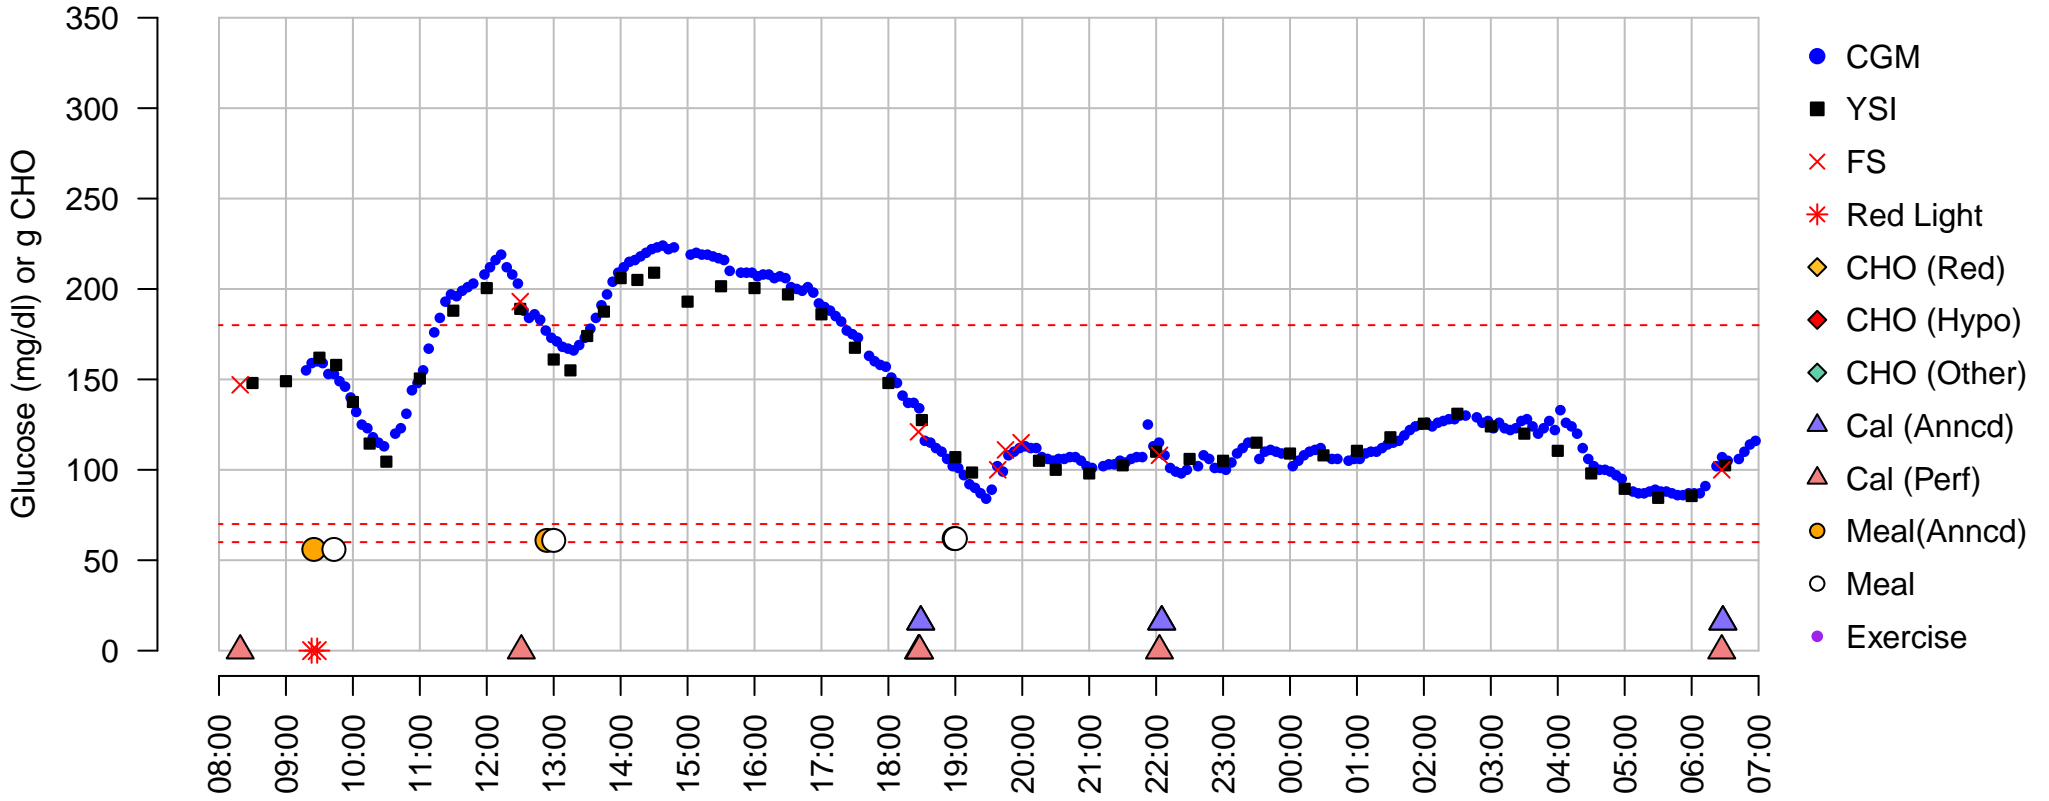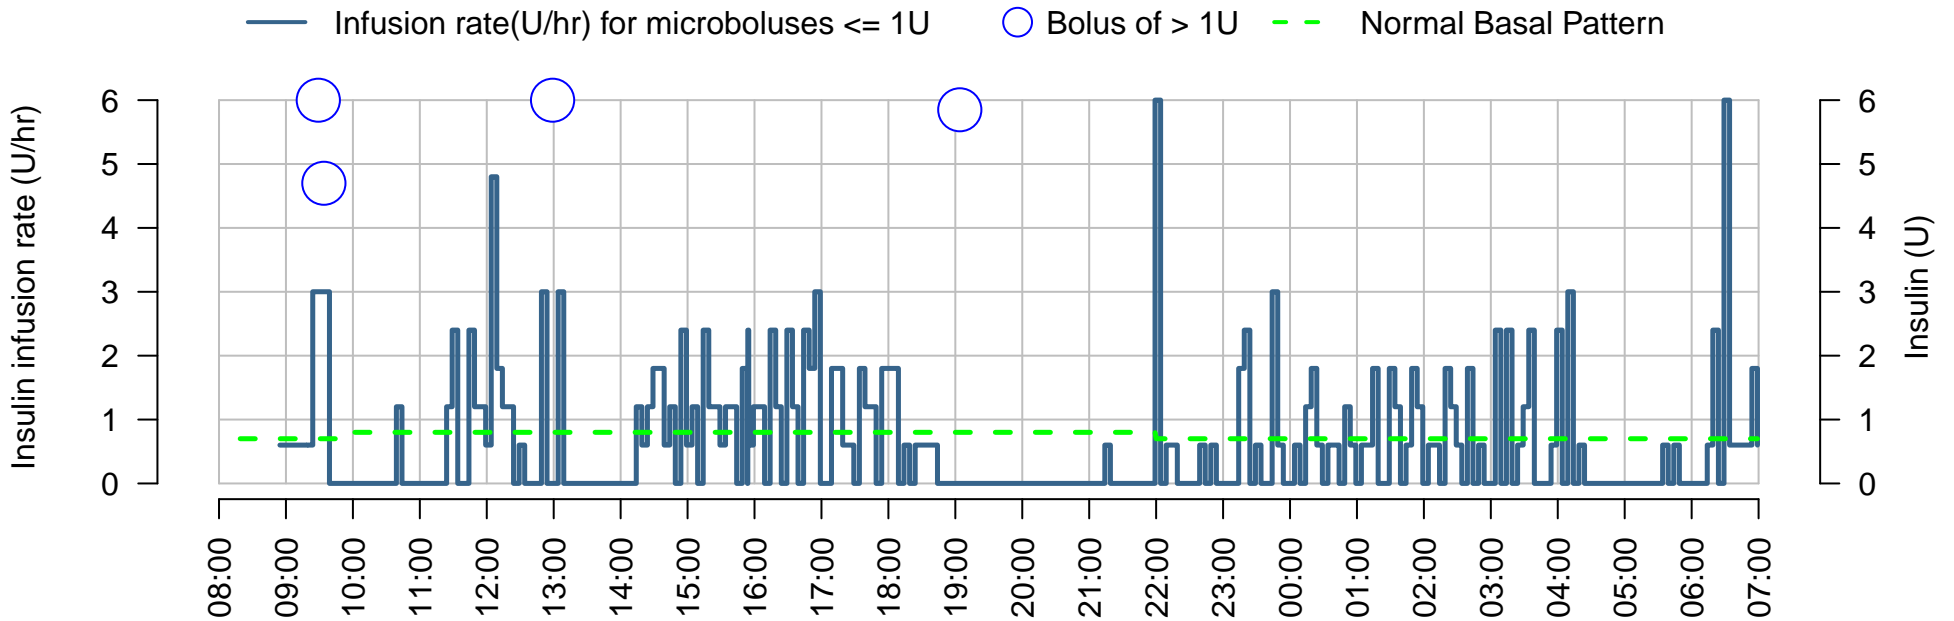



# Subject 16

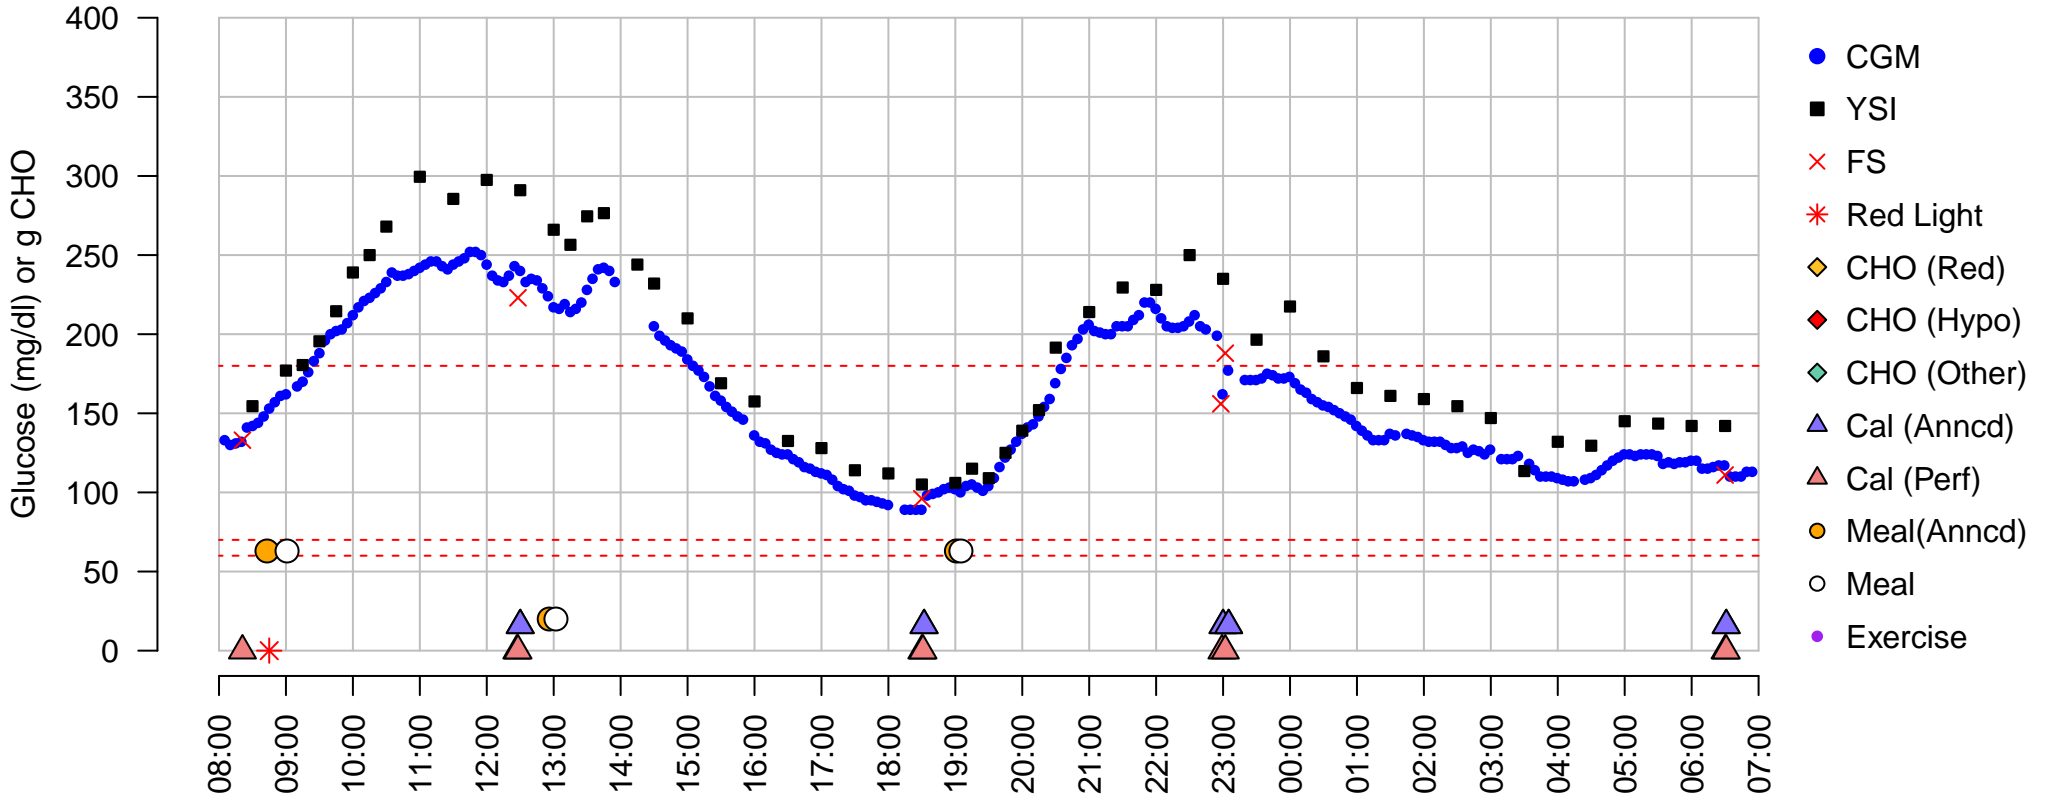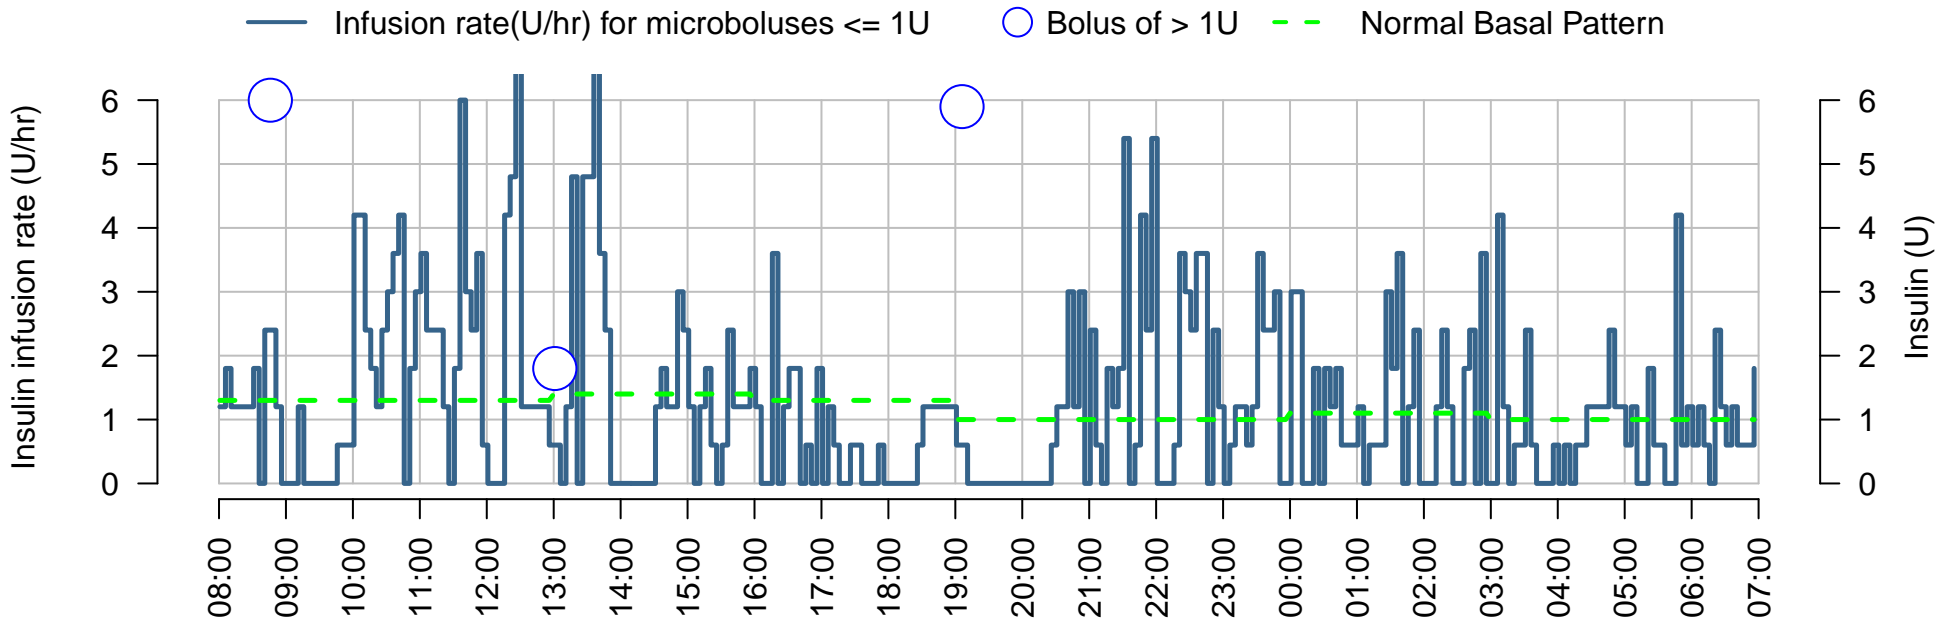

# Subject 17

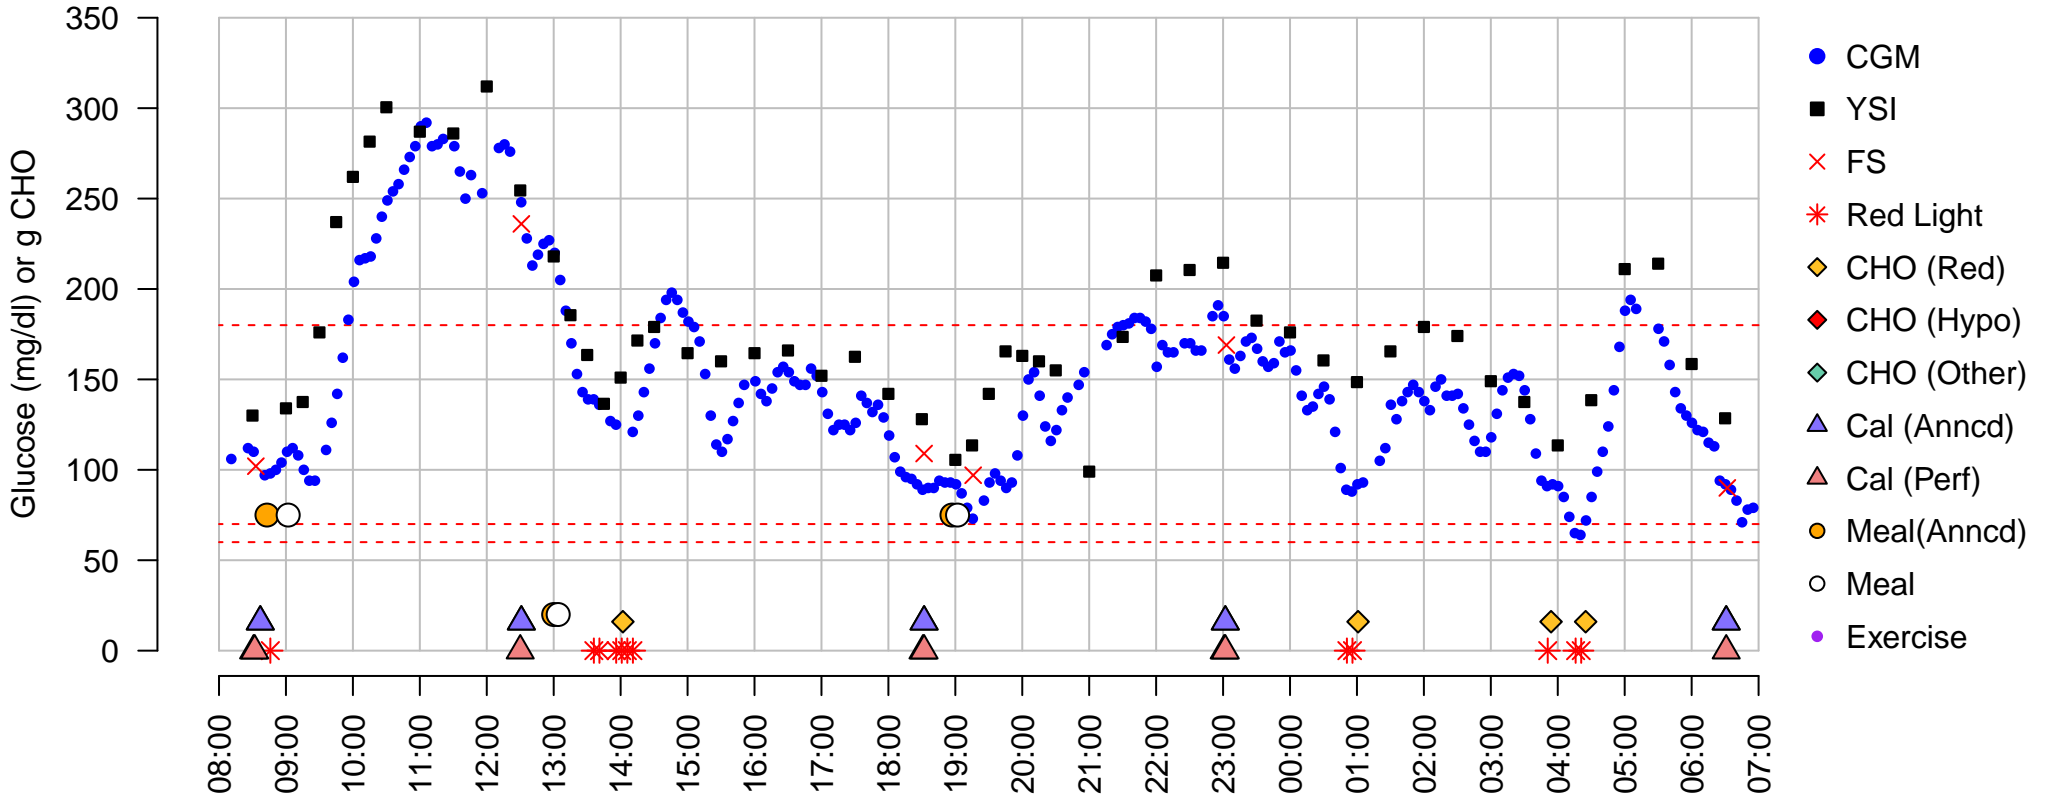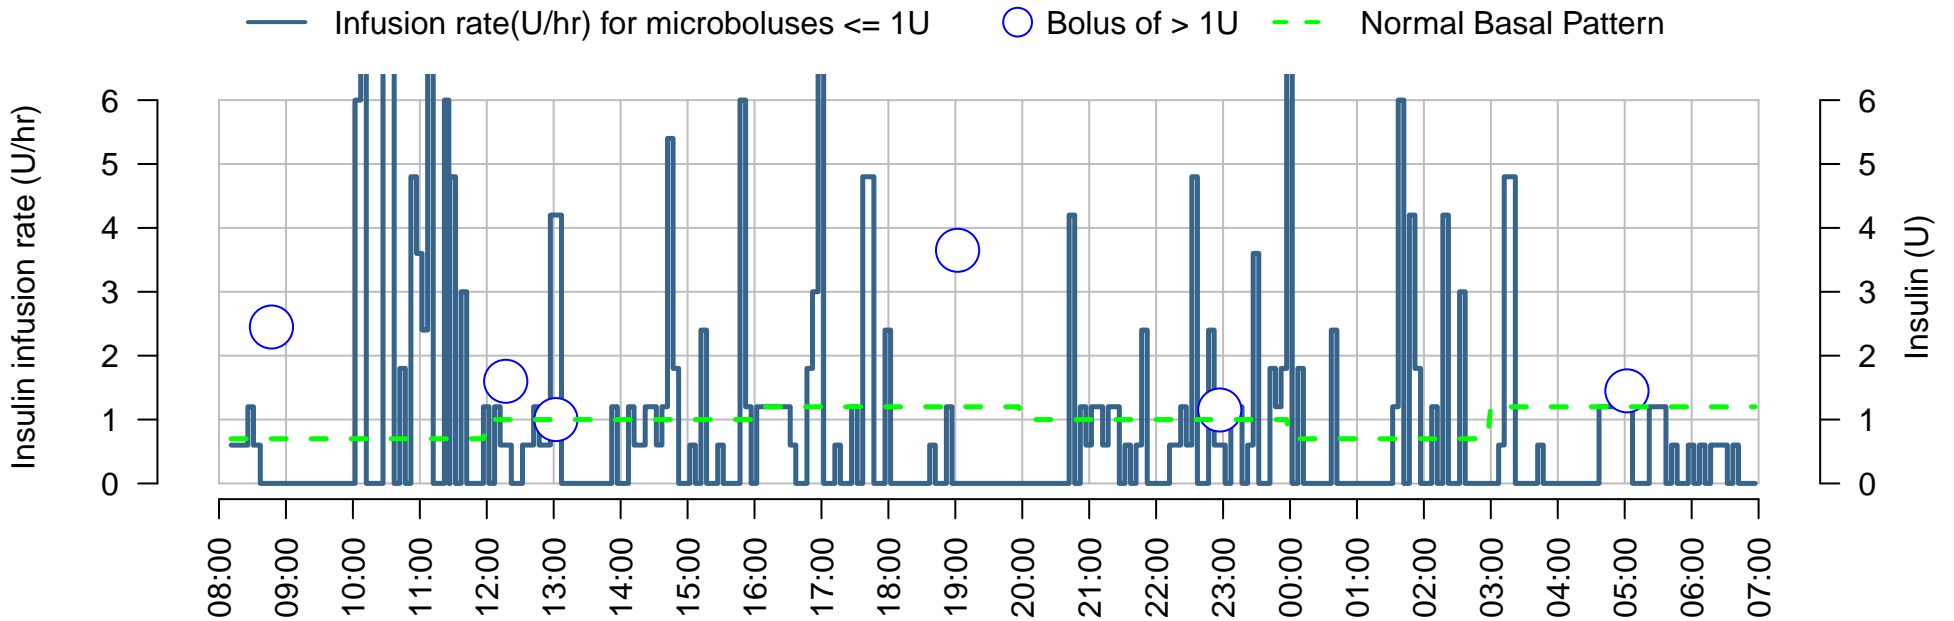

# Subject 18

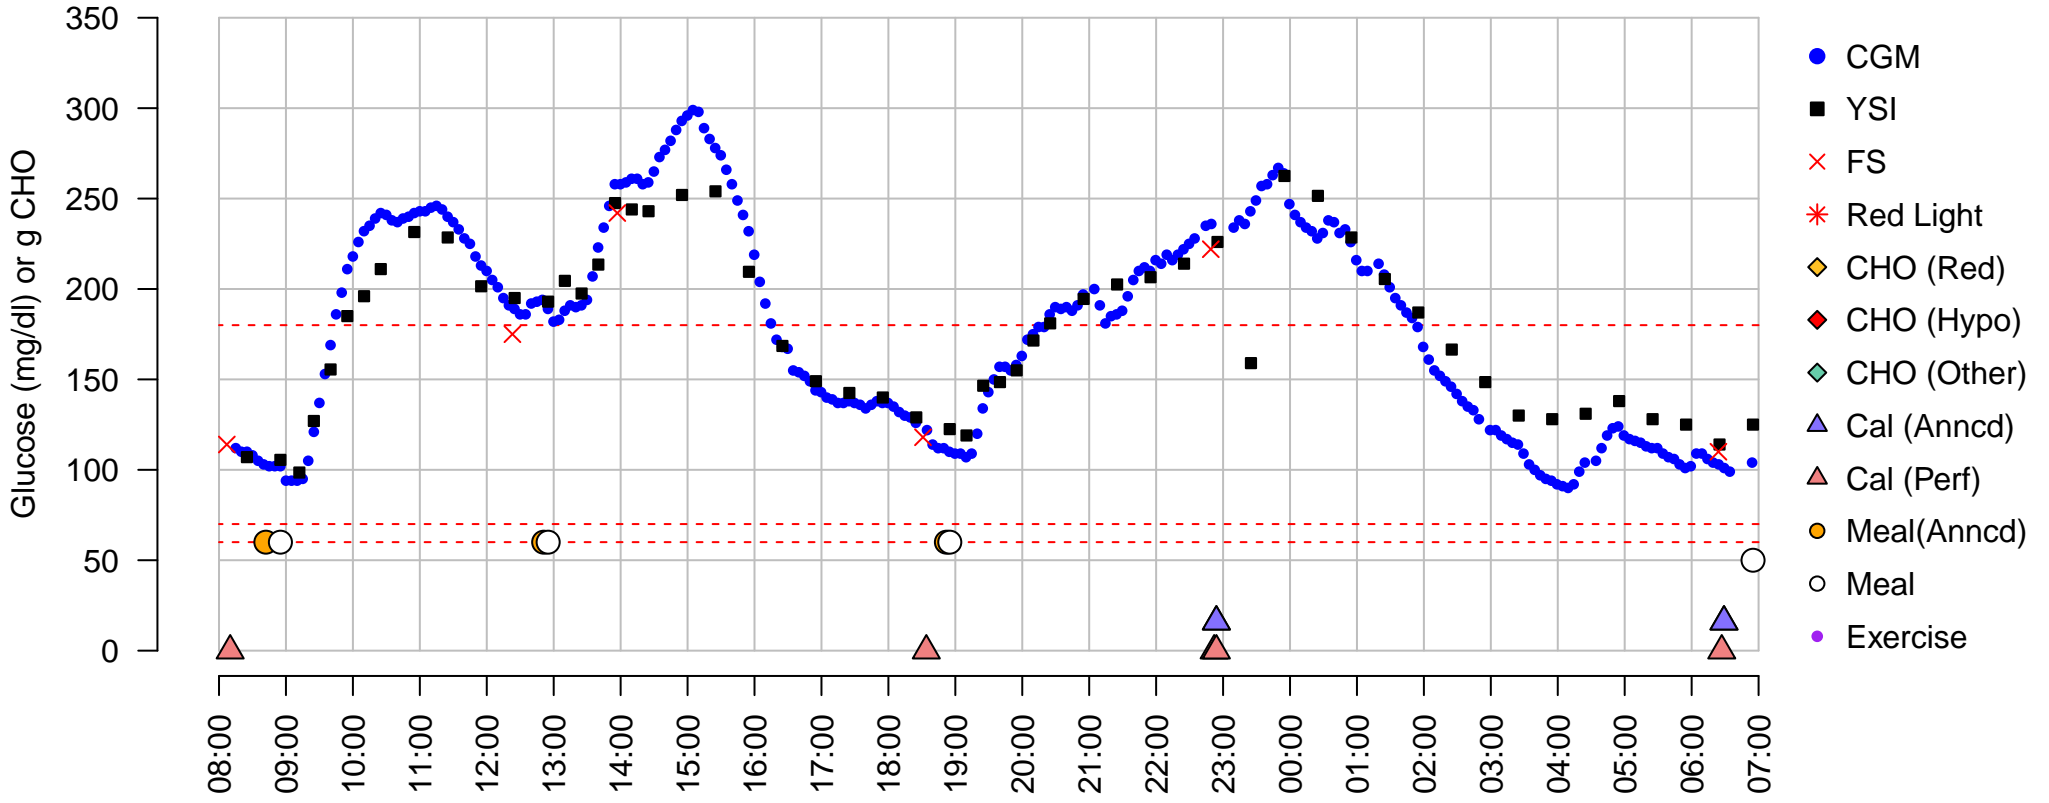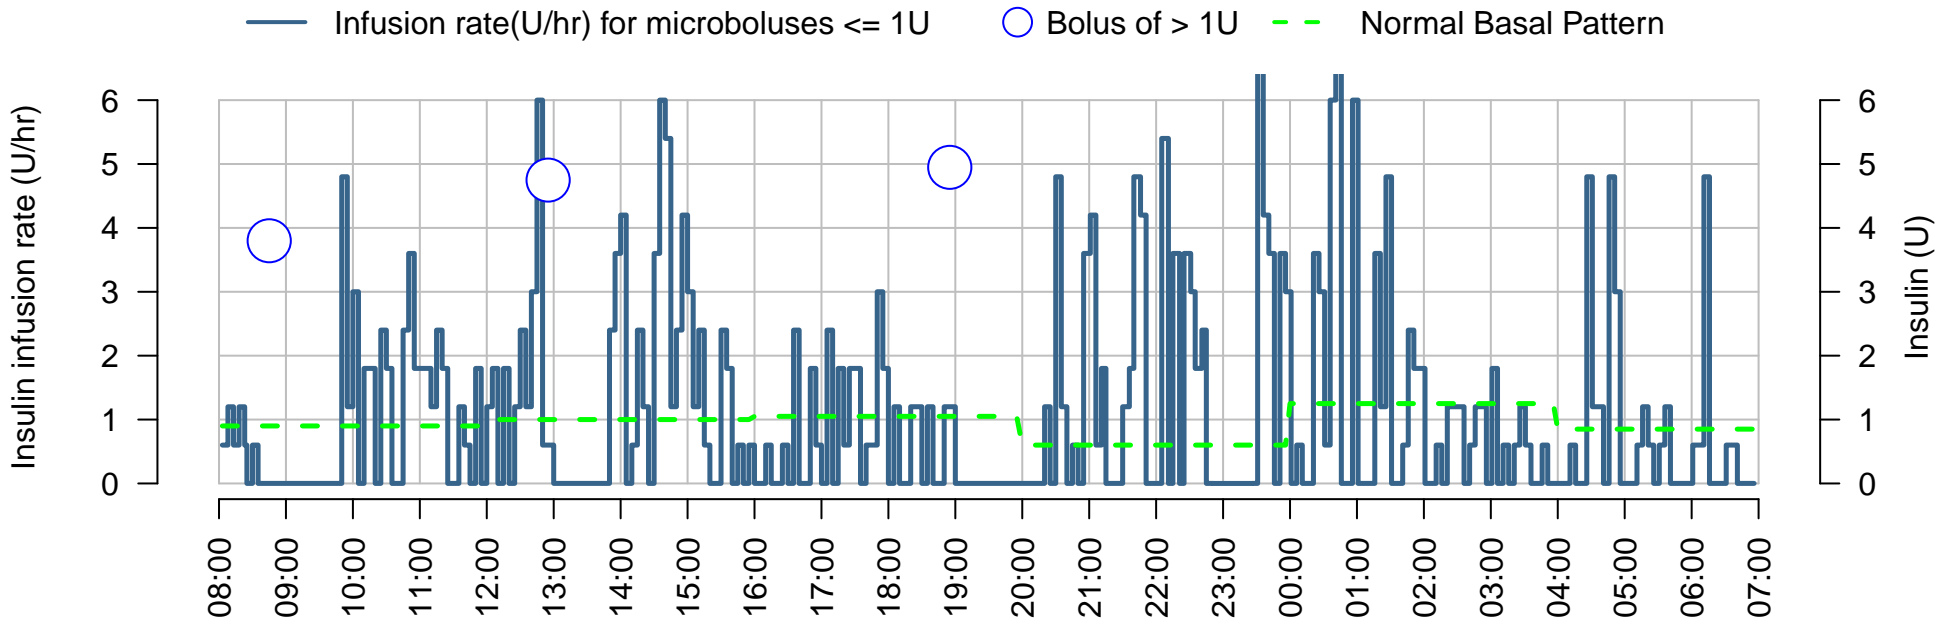

# Subject 19

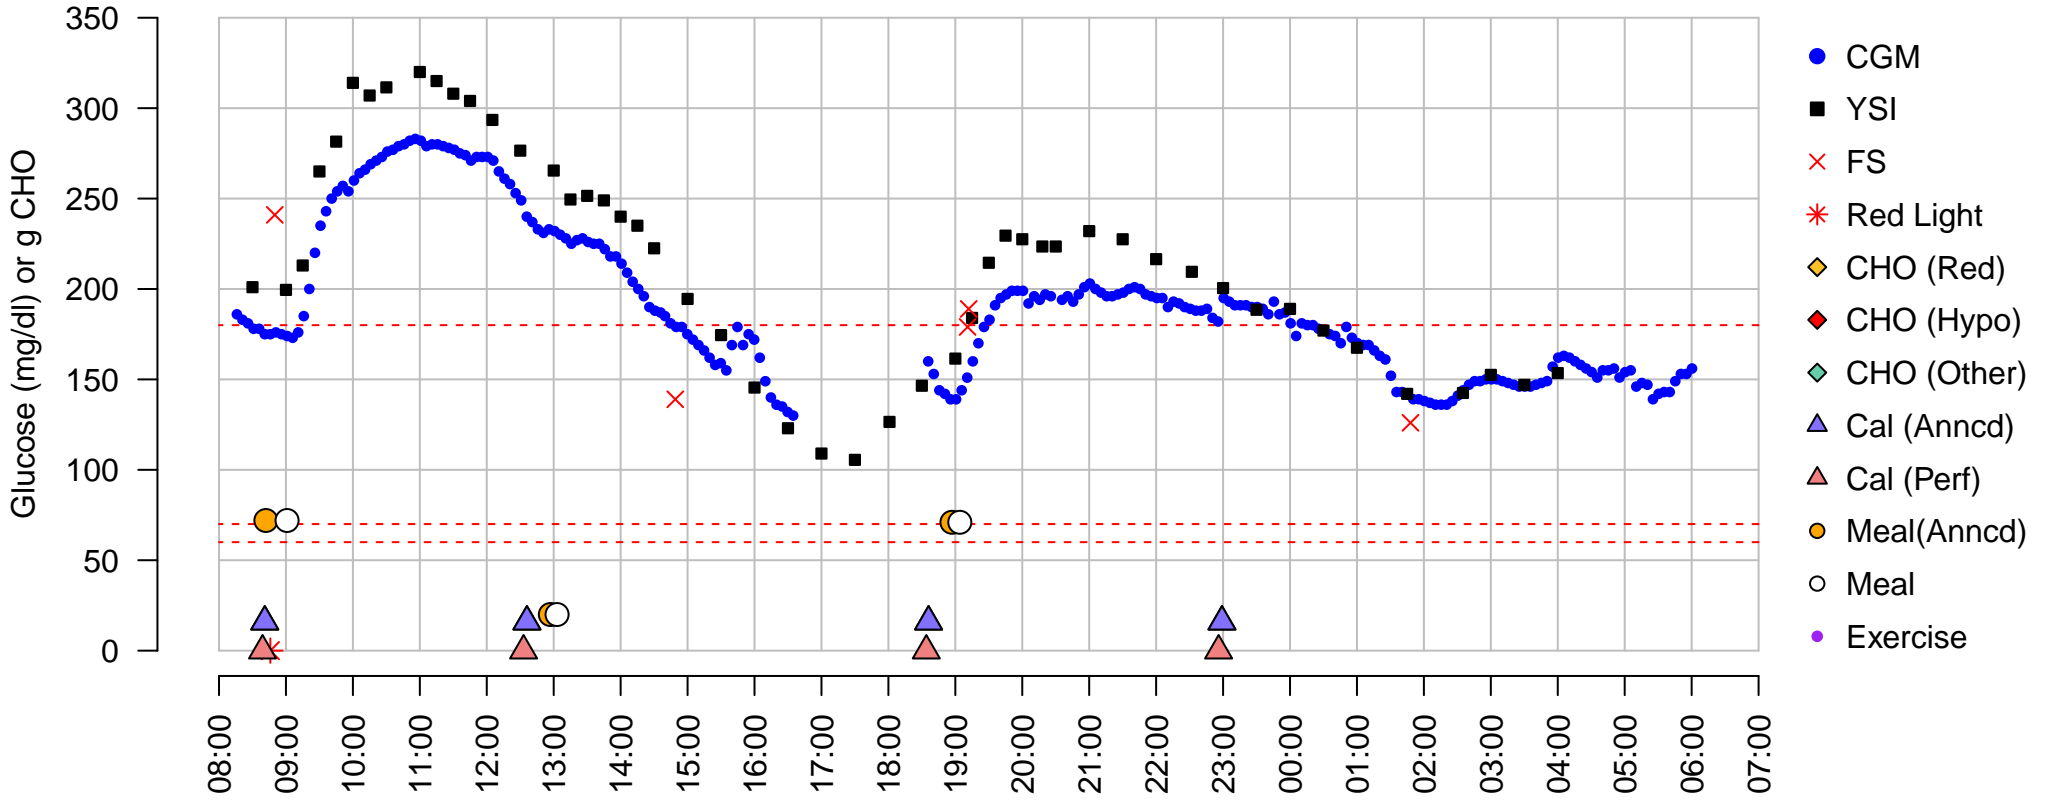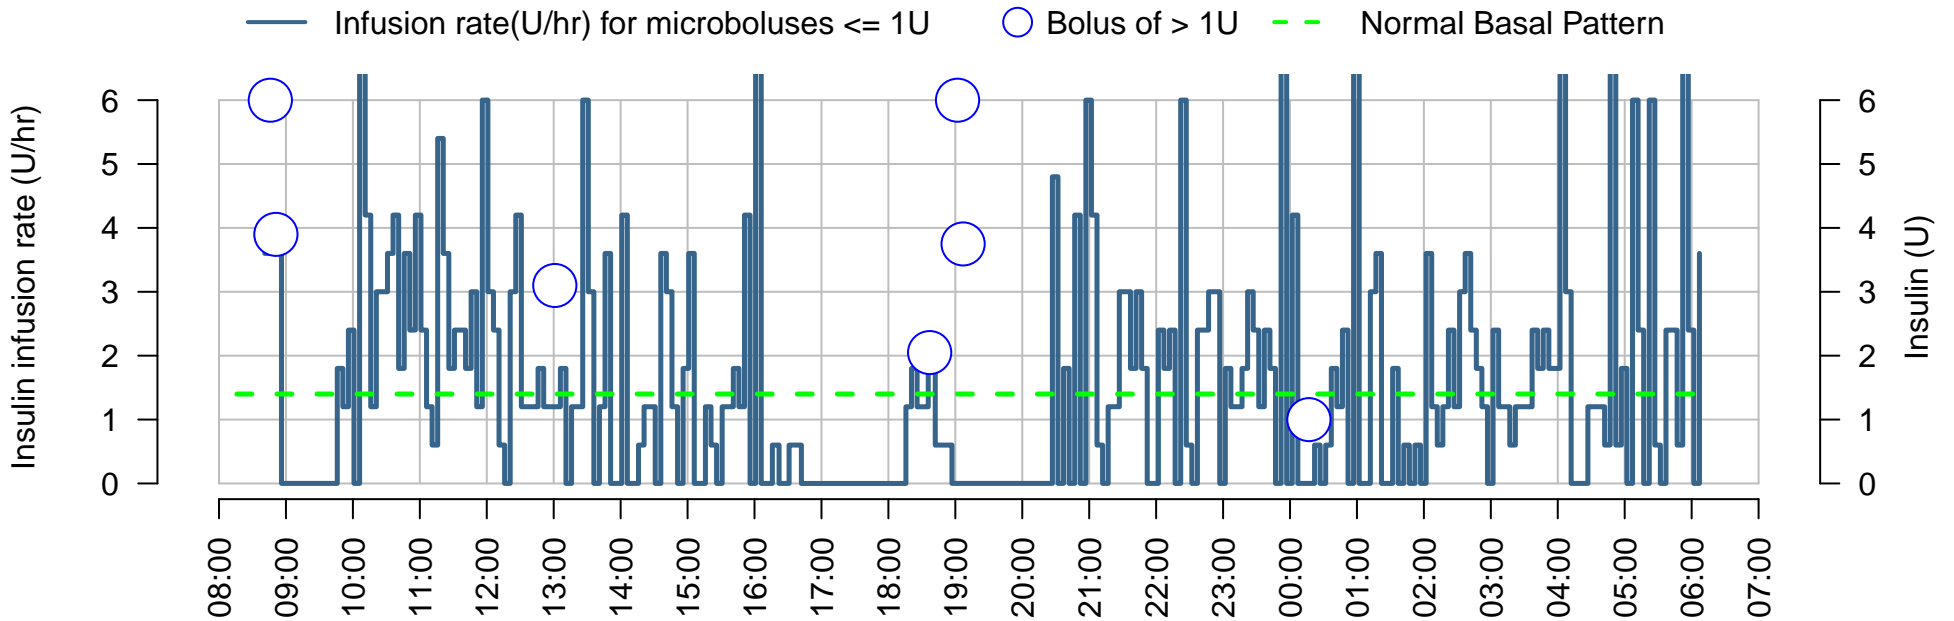

# Subject 20

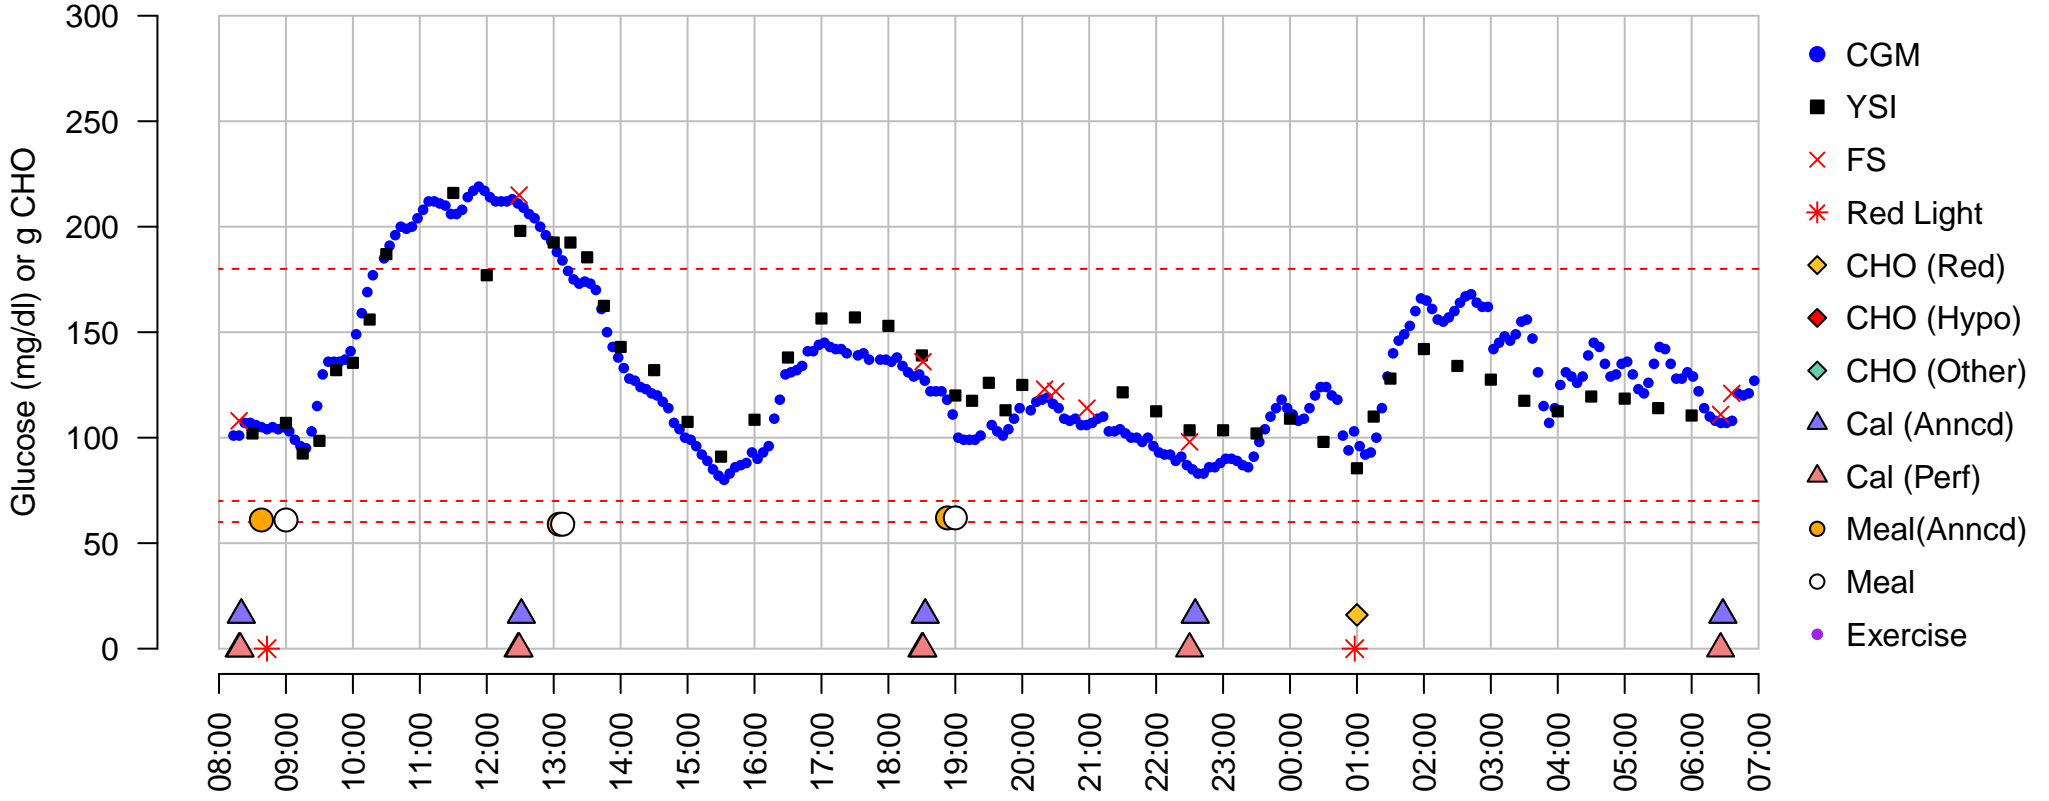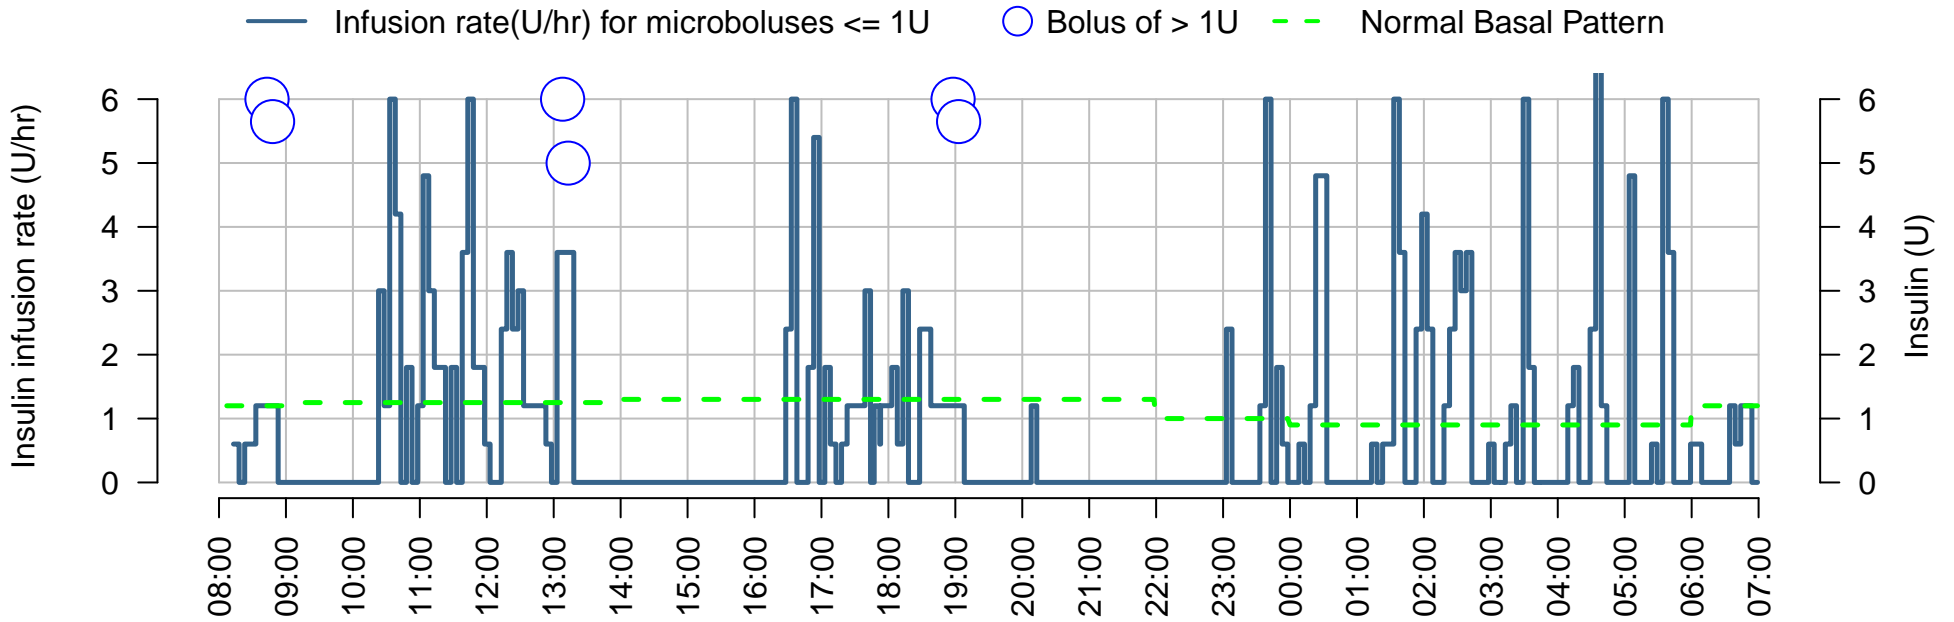

# Subject 21

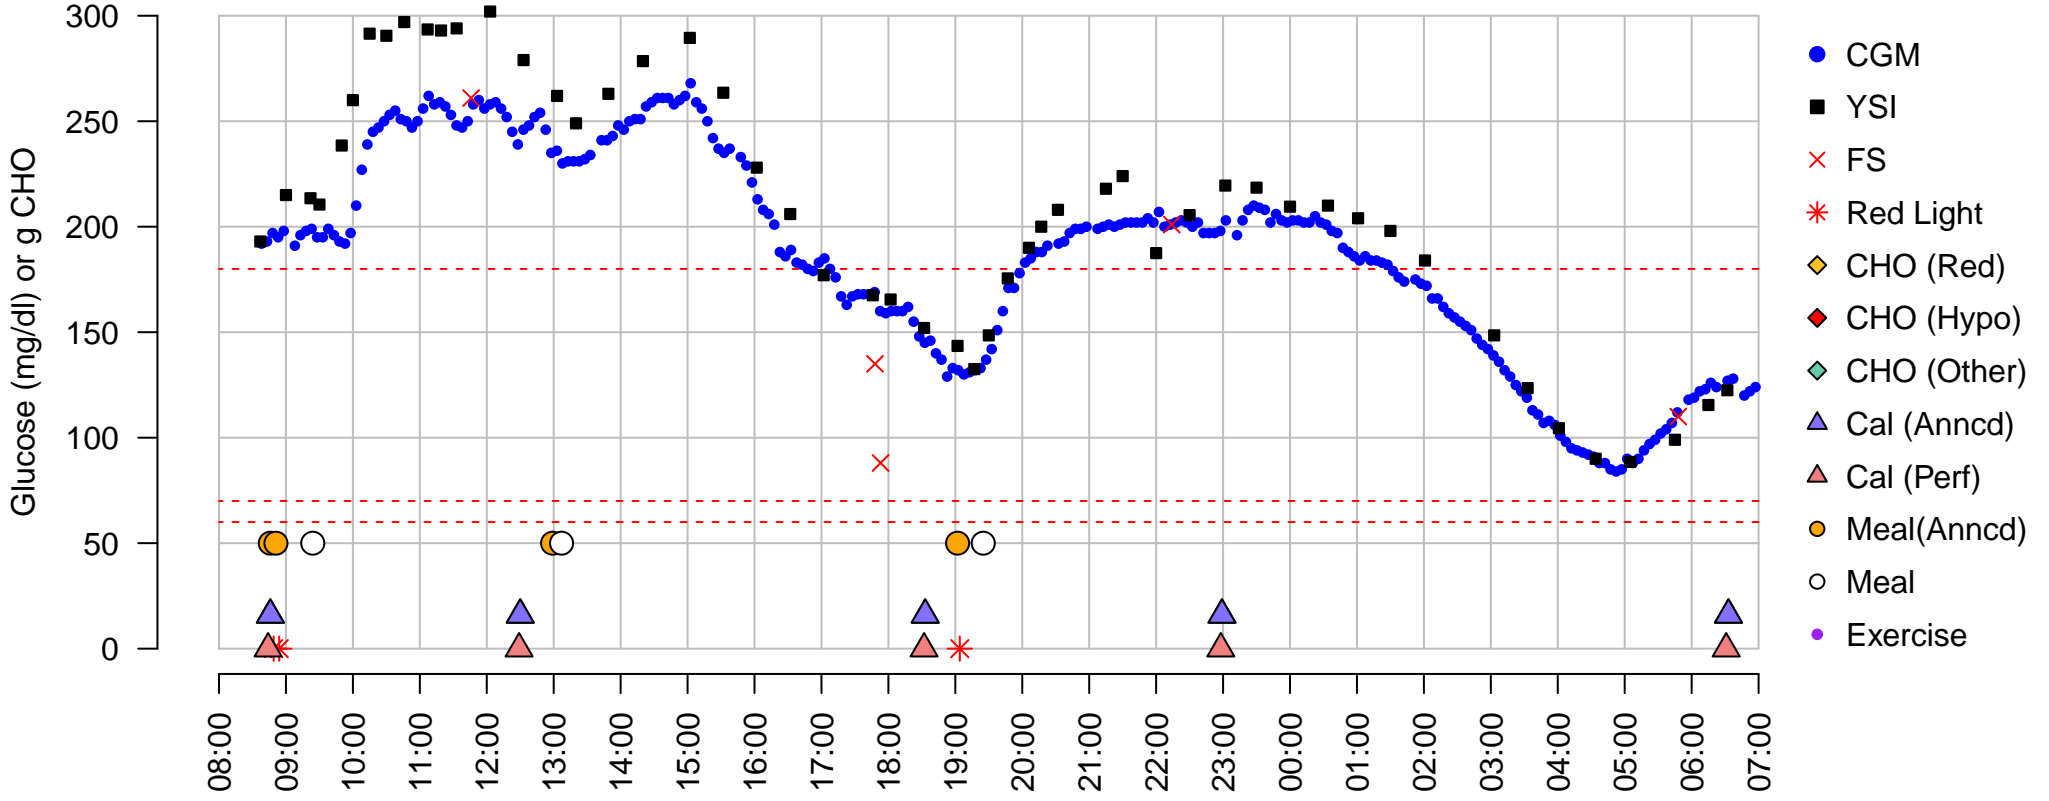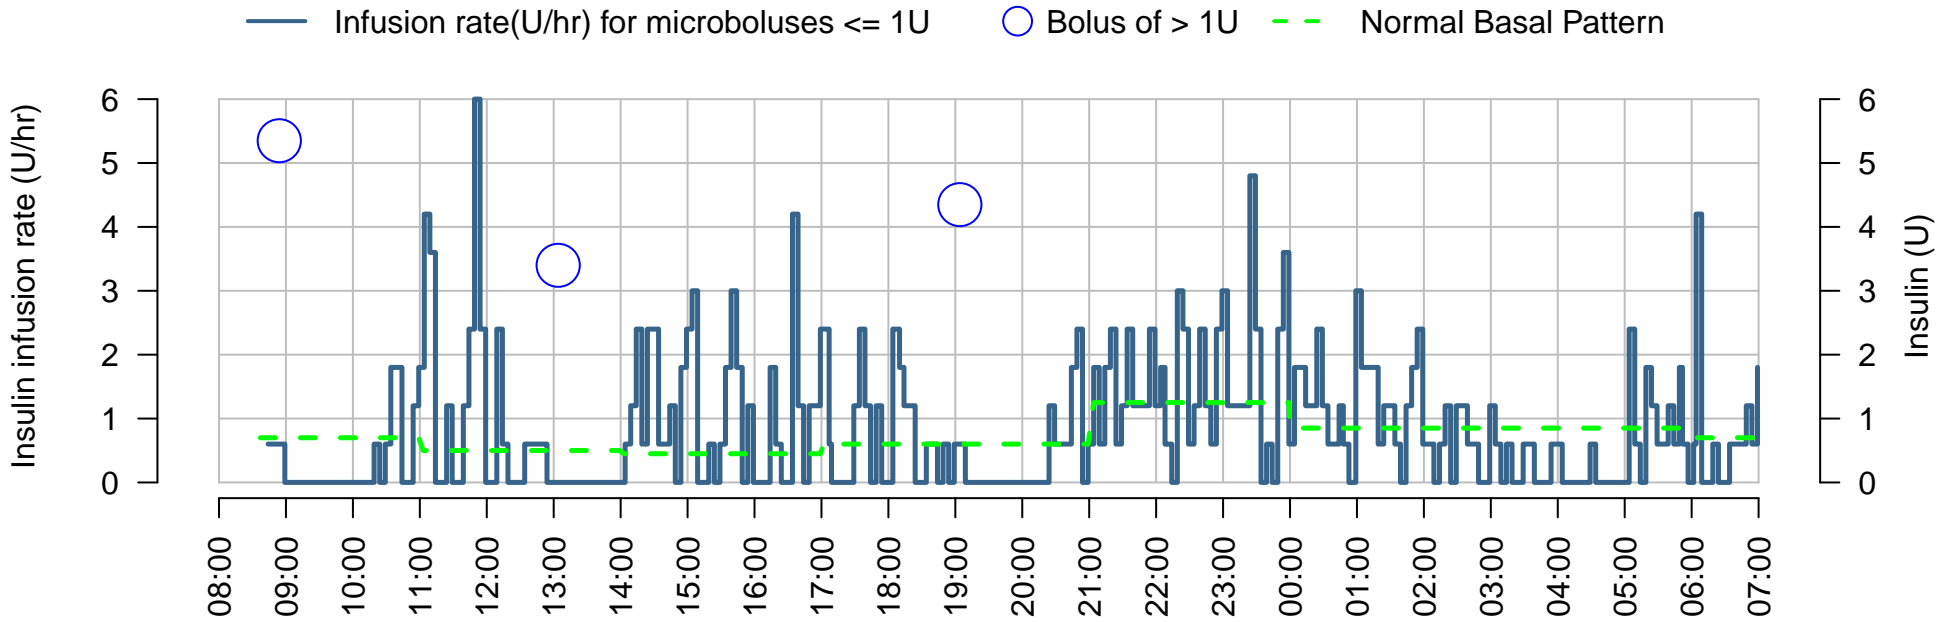

# Subject 22

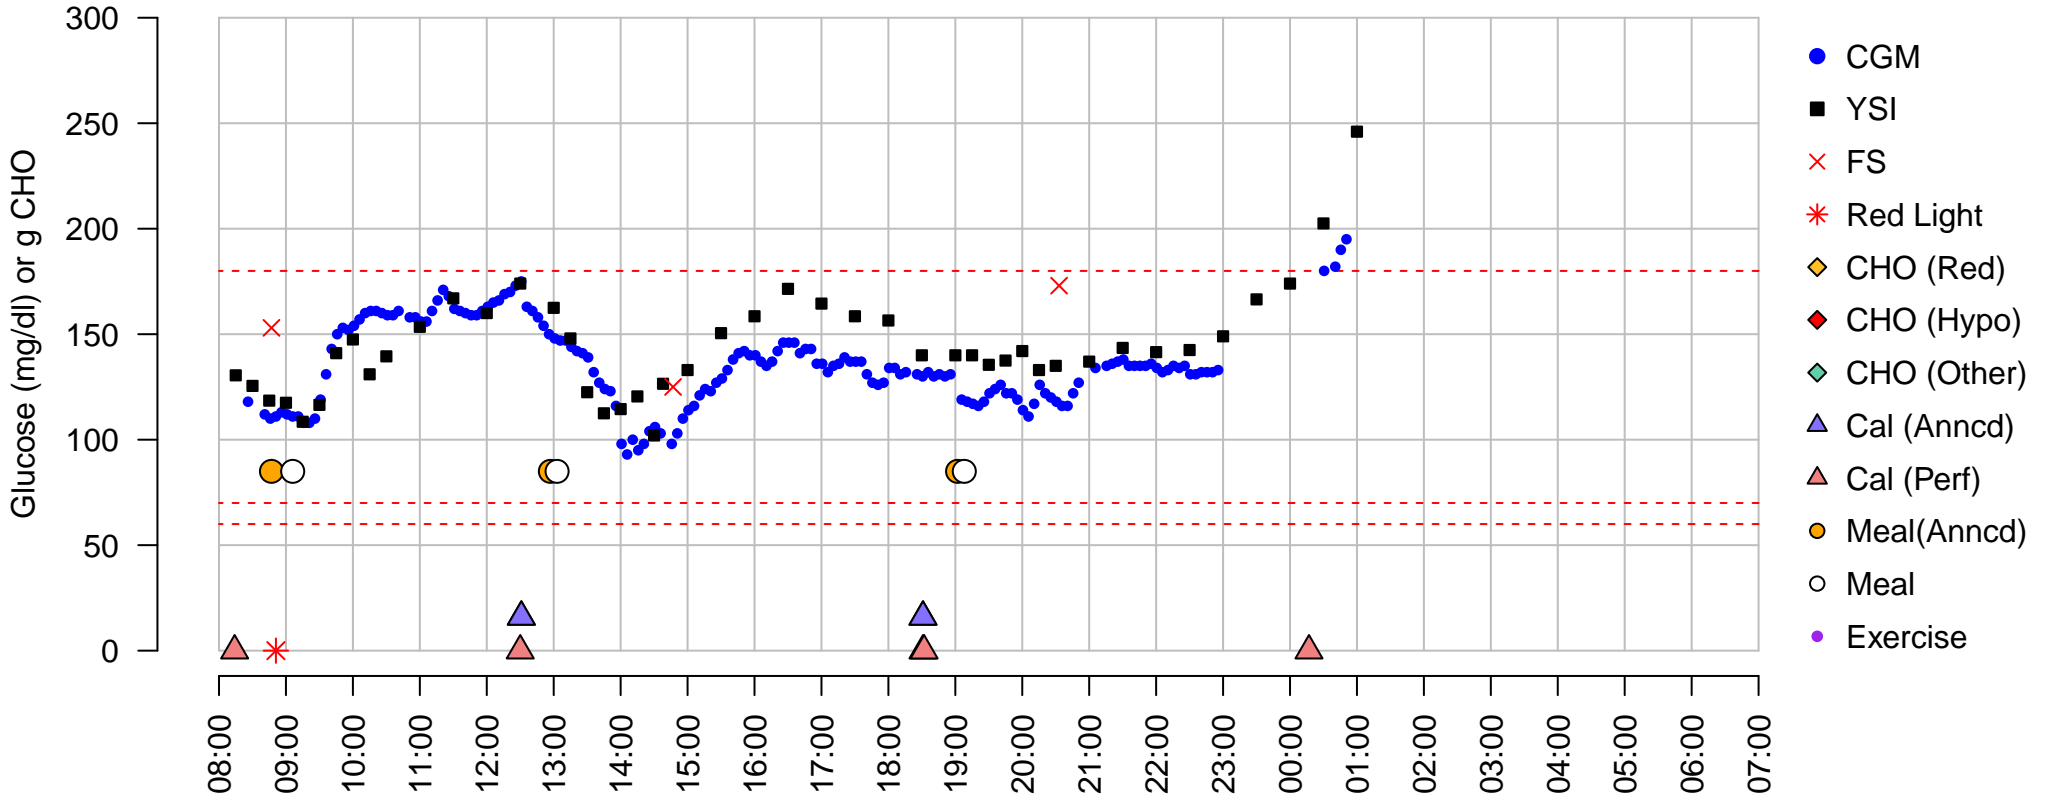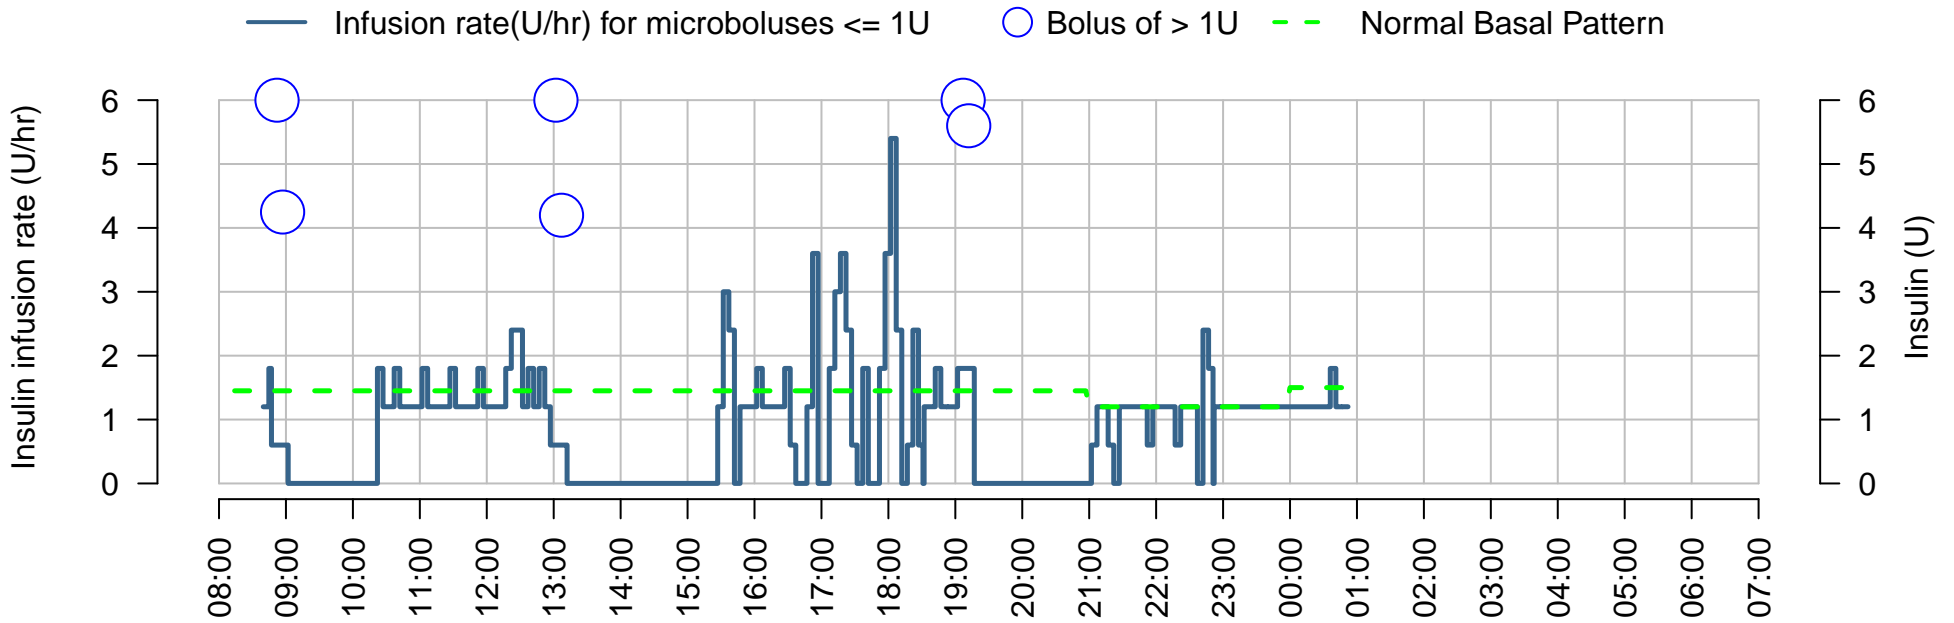

# Subject 23

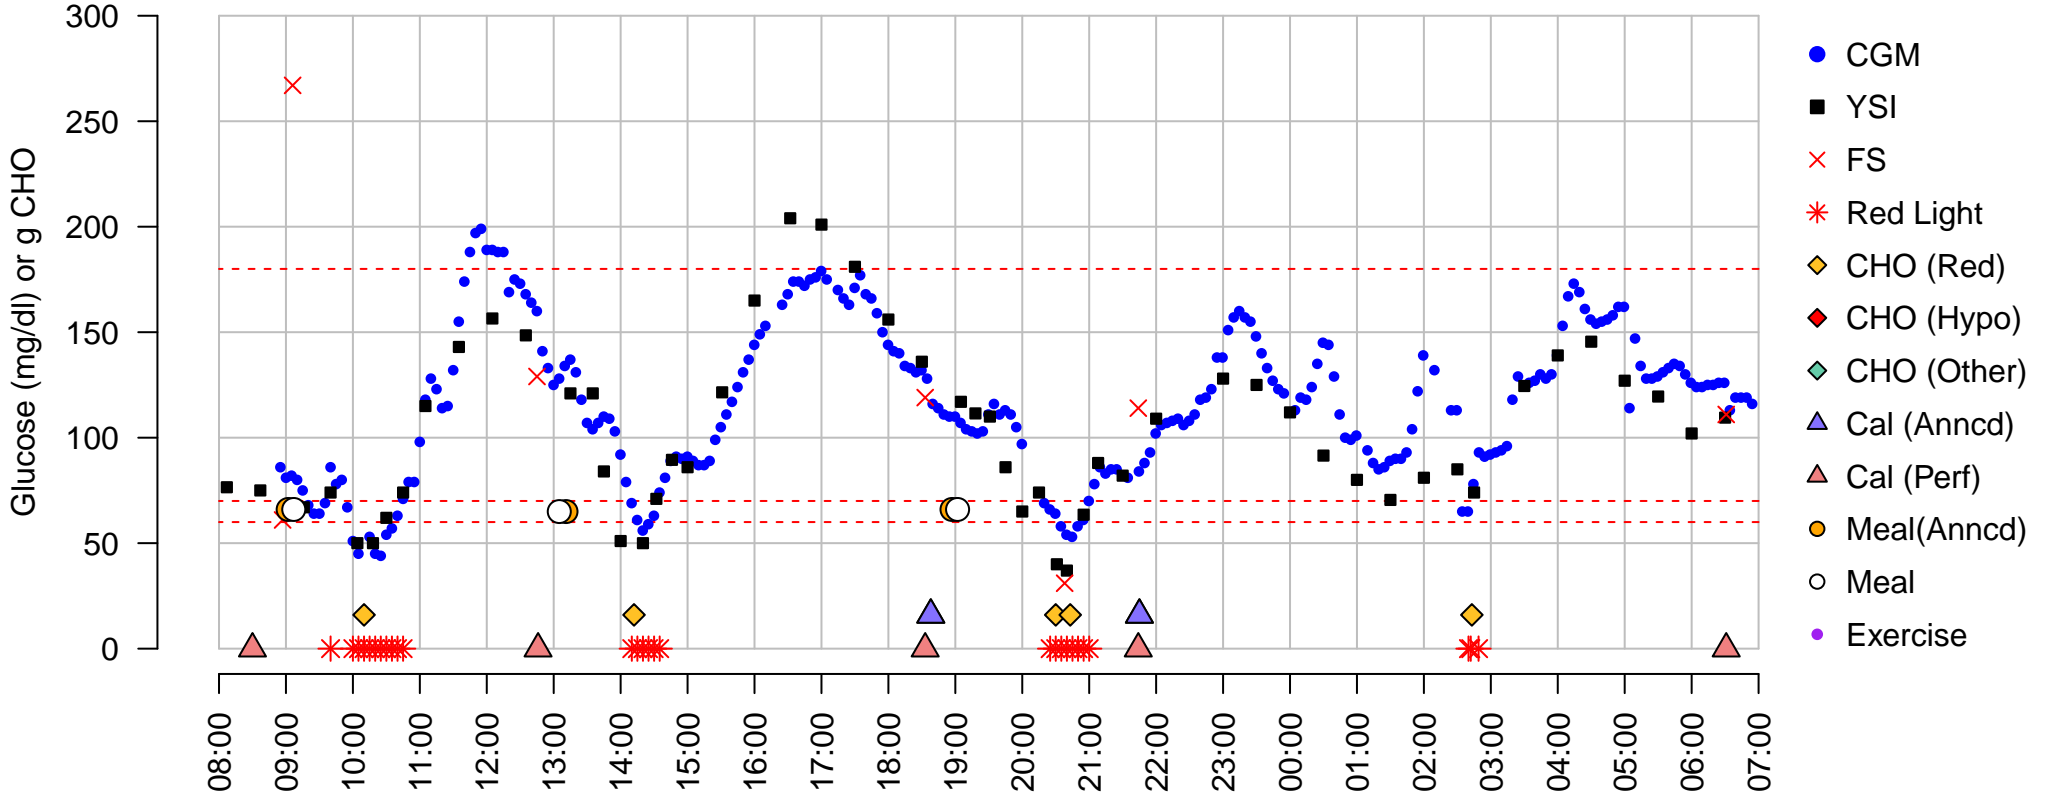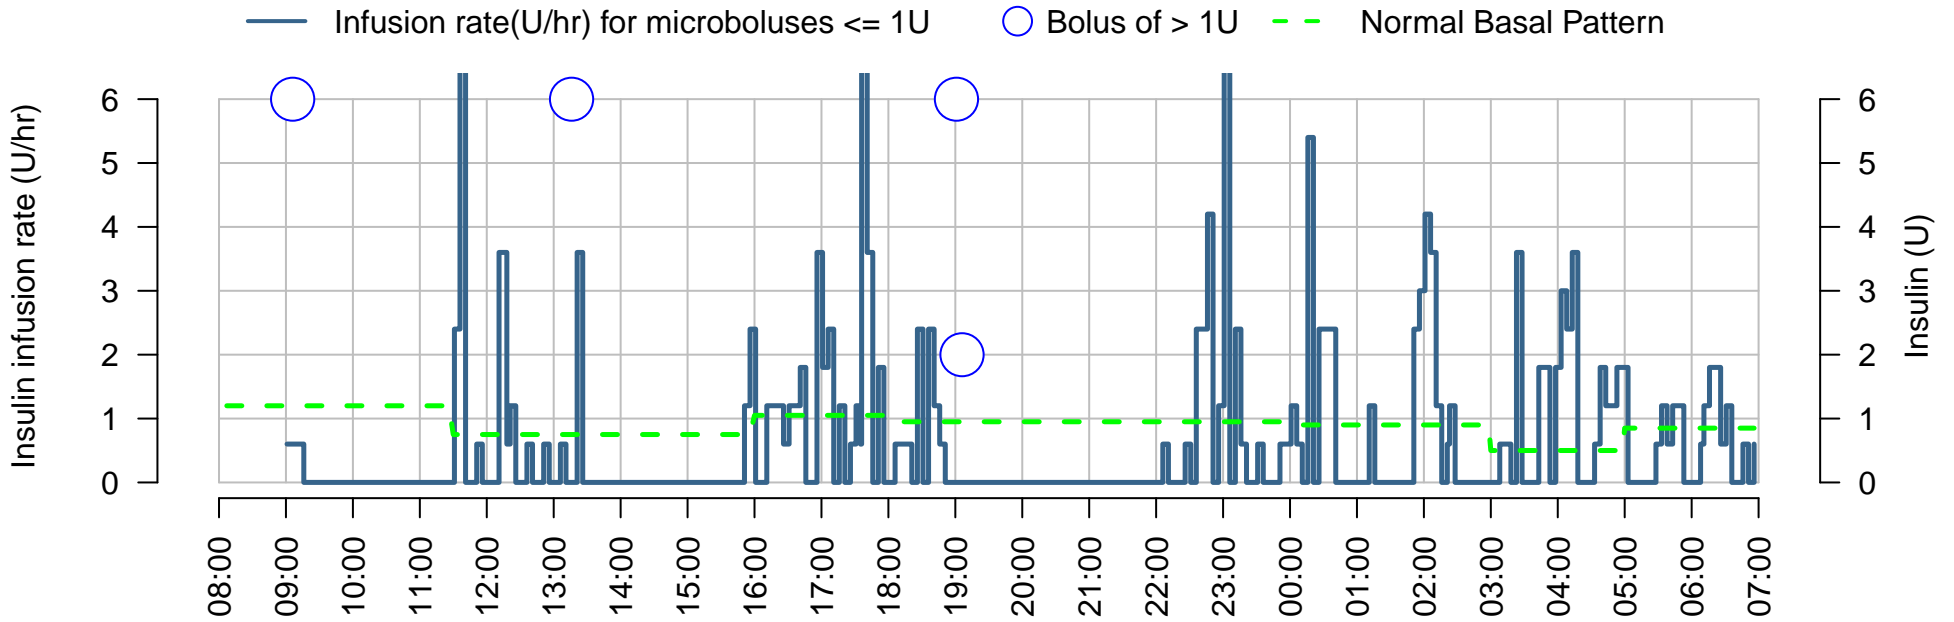



# Subject 24

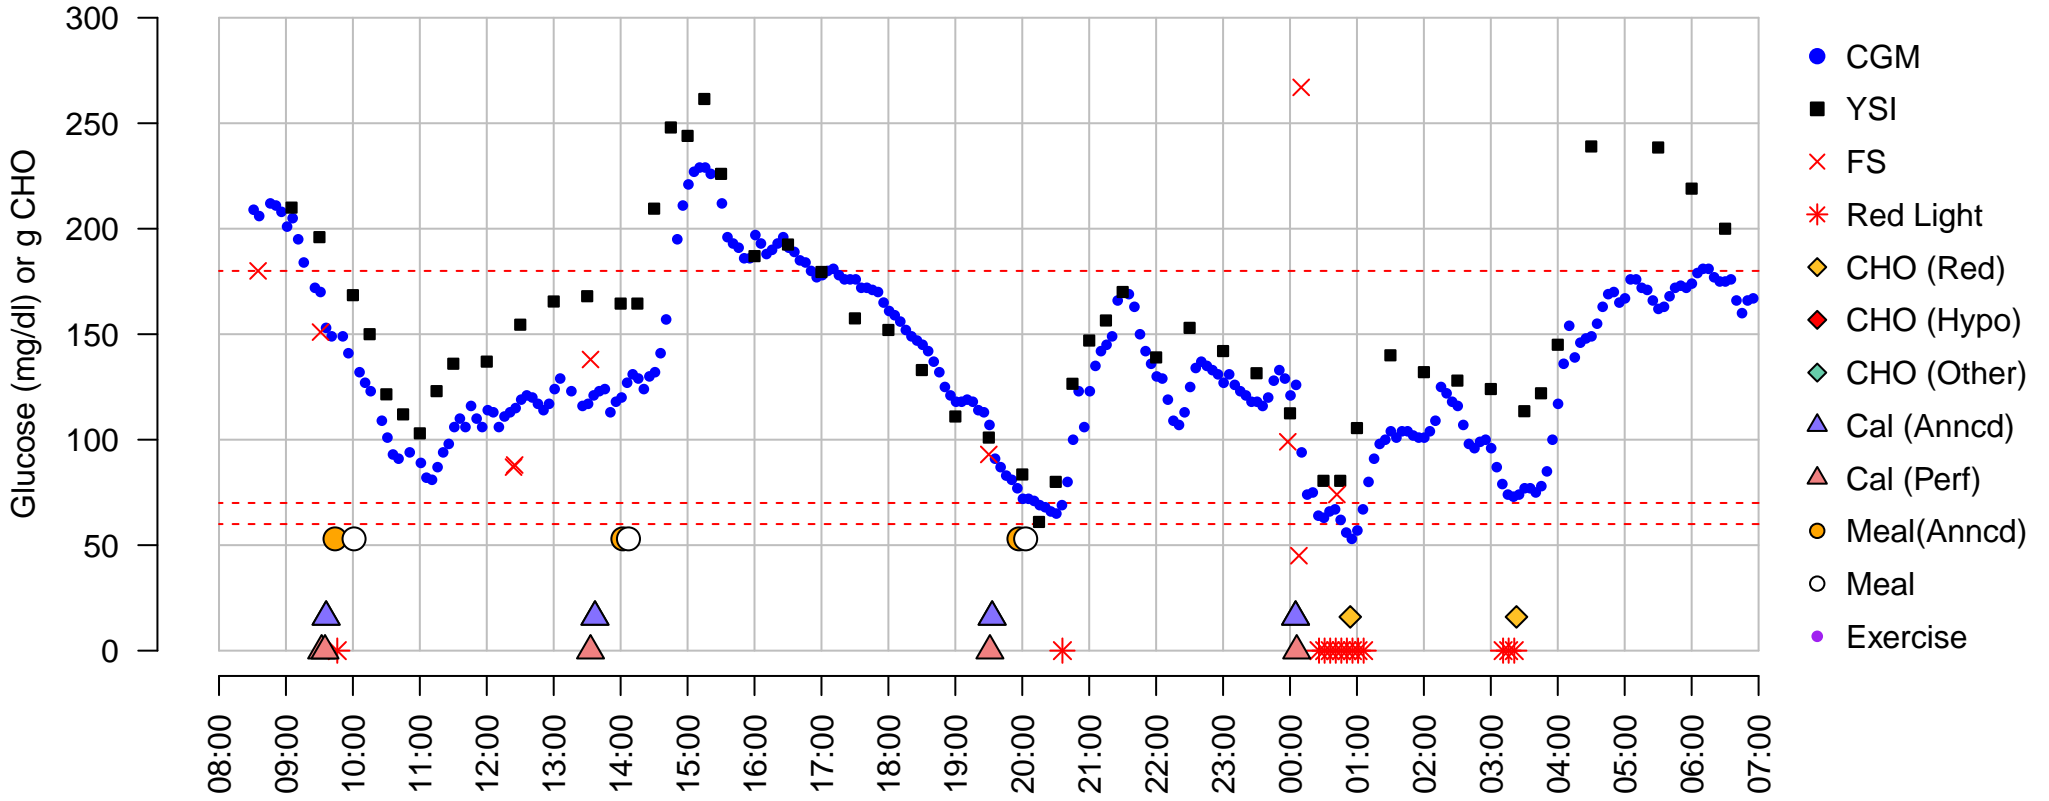

— Infusion rate(U/hr) for microboluses  $\leq 1$ U    ○ Bolus of  $> 1$ U    - - - Normal Basal Pattern

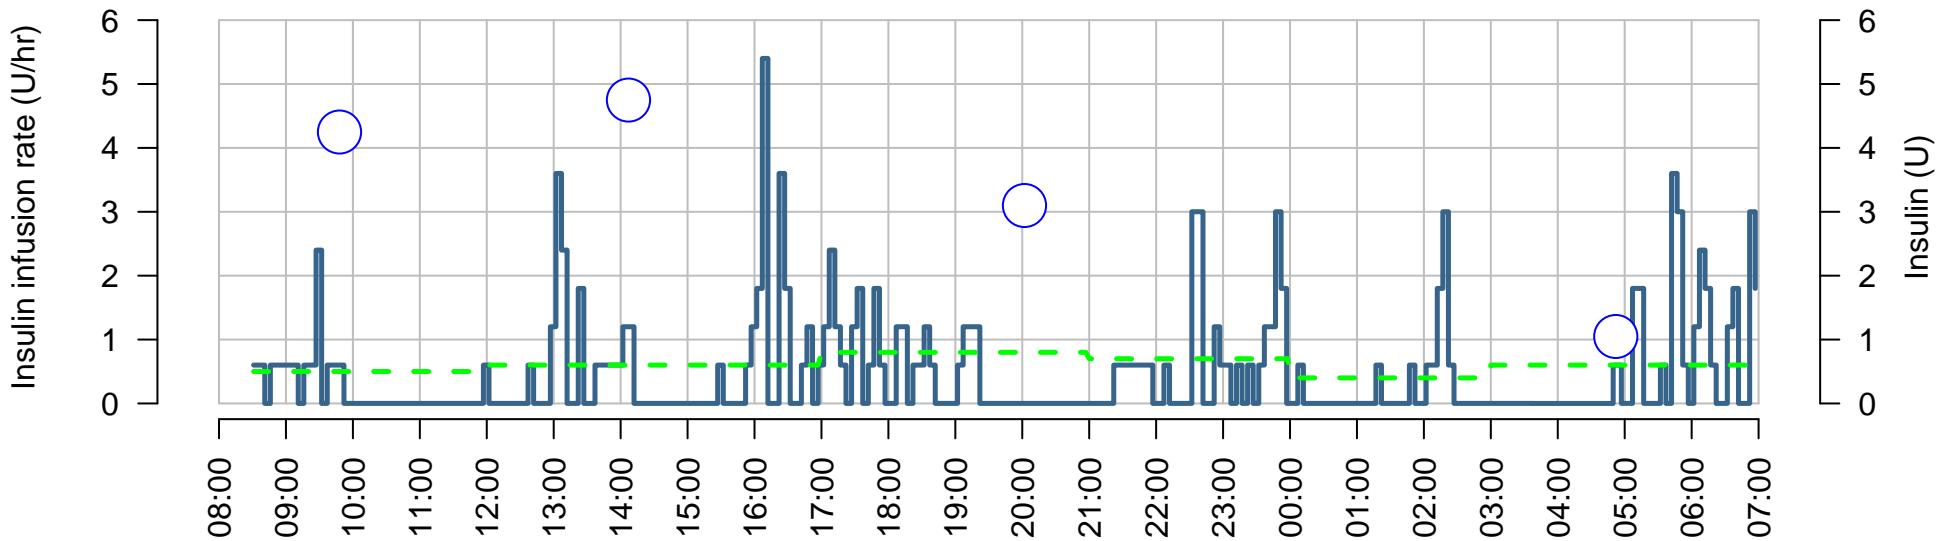

# Subject 25

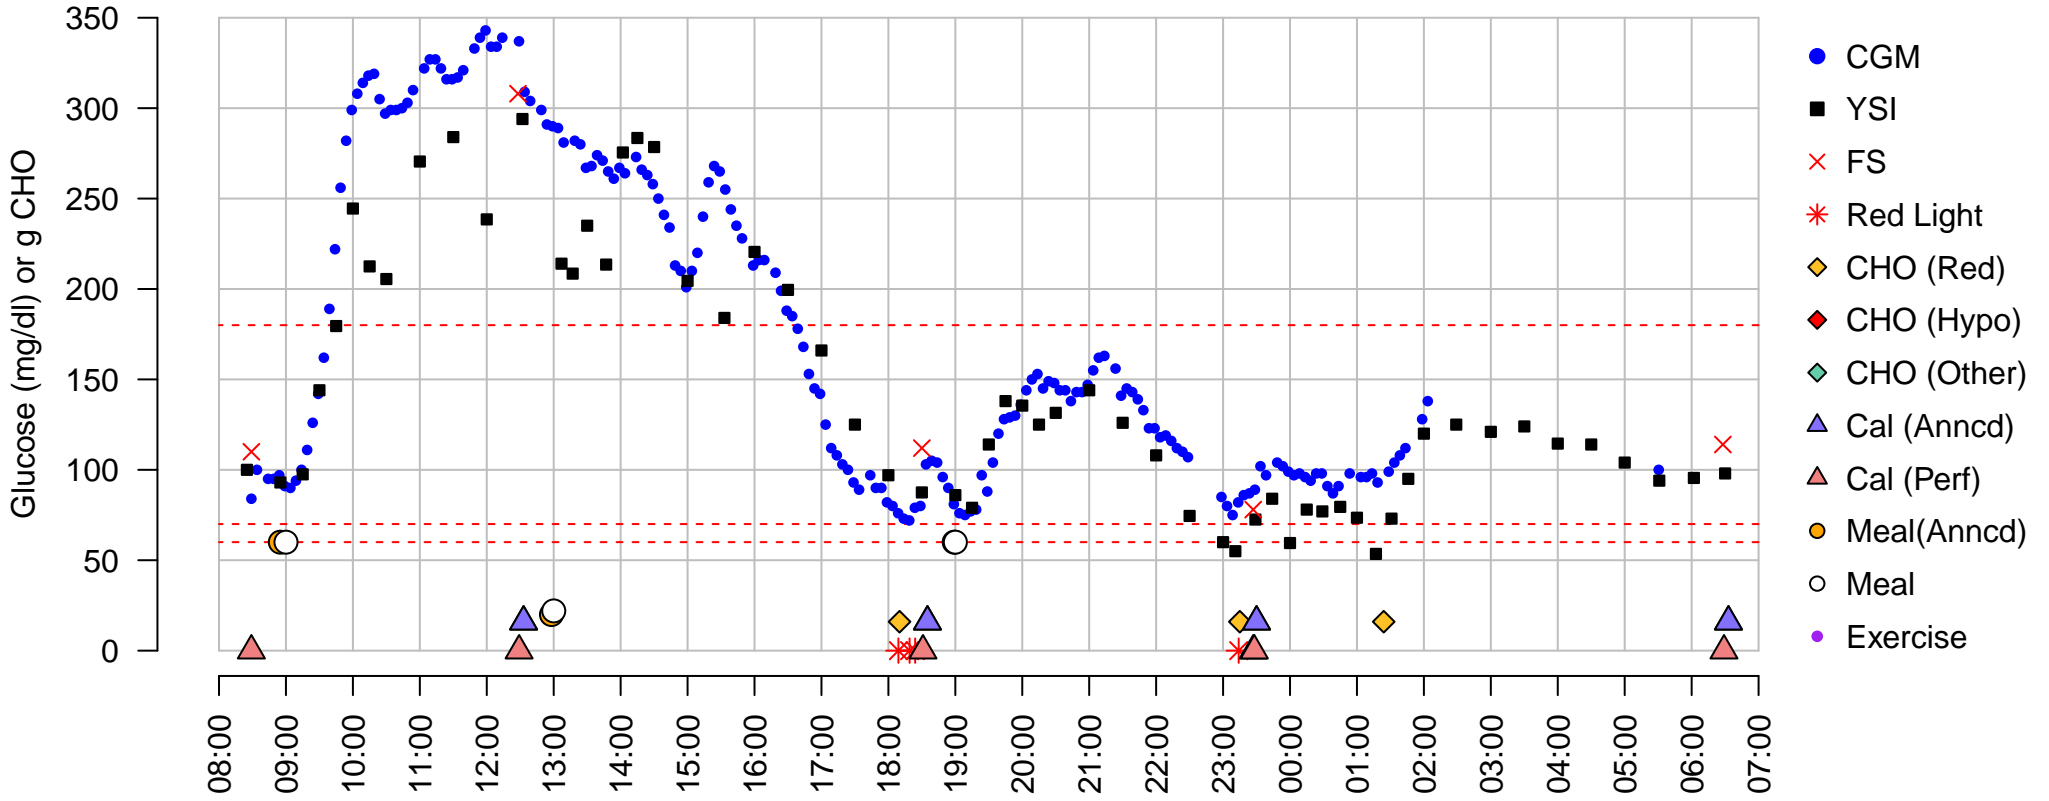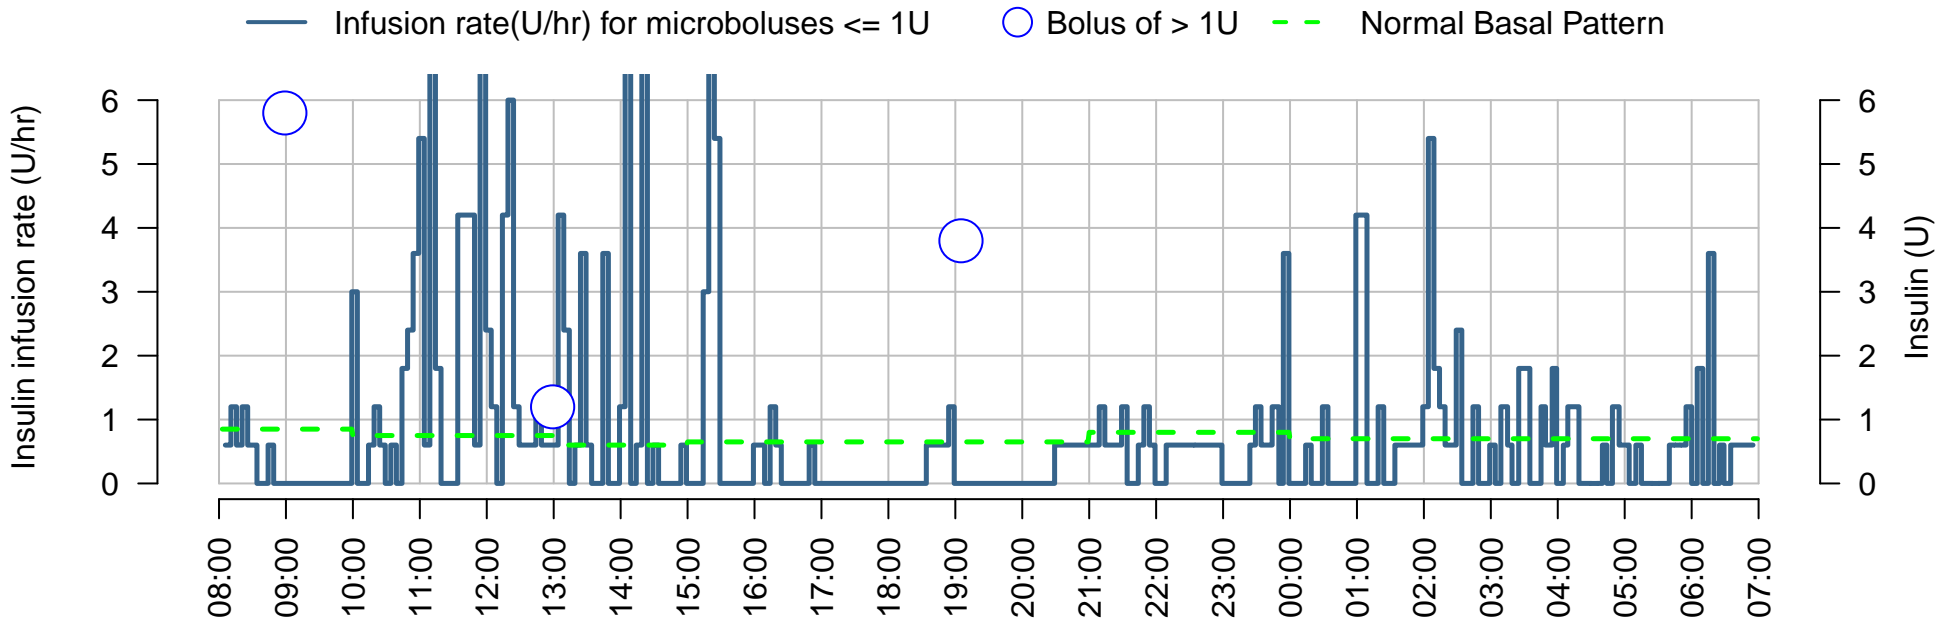

# Subject 26

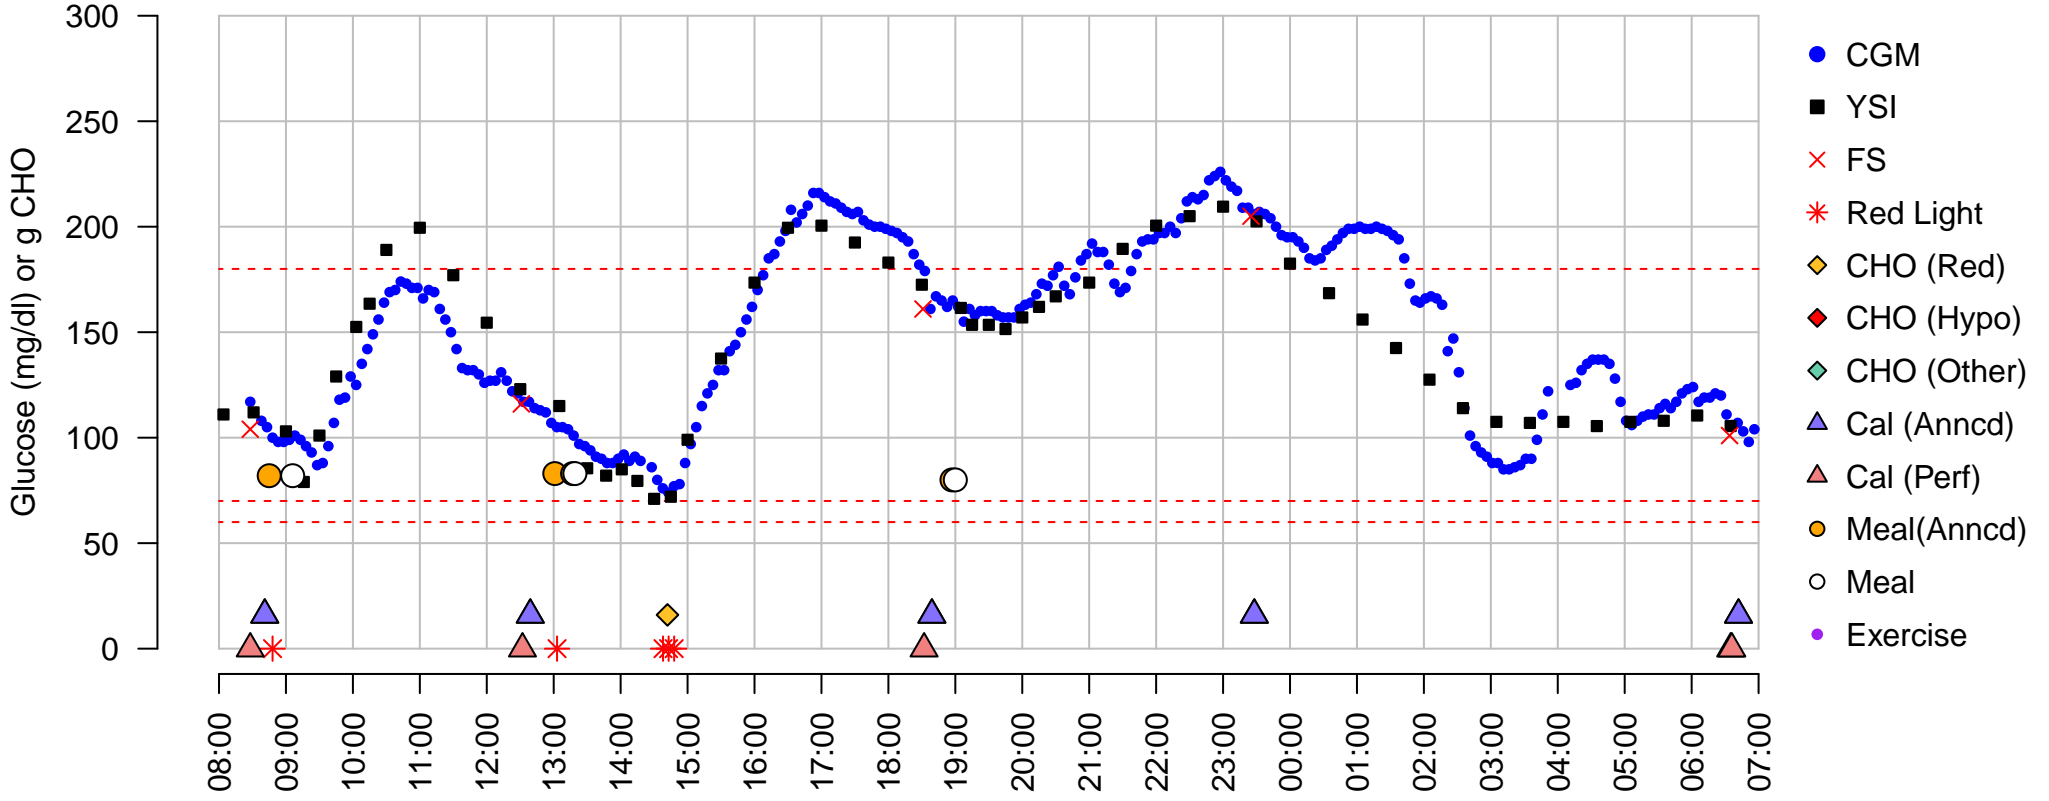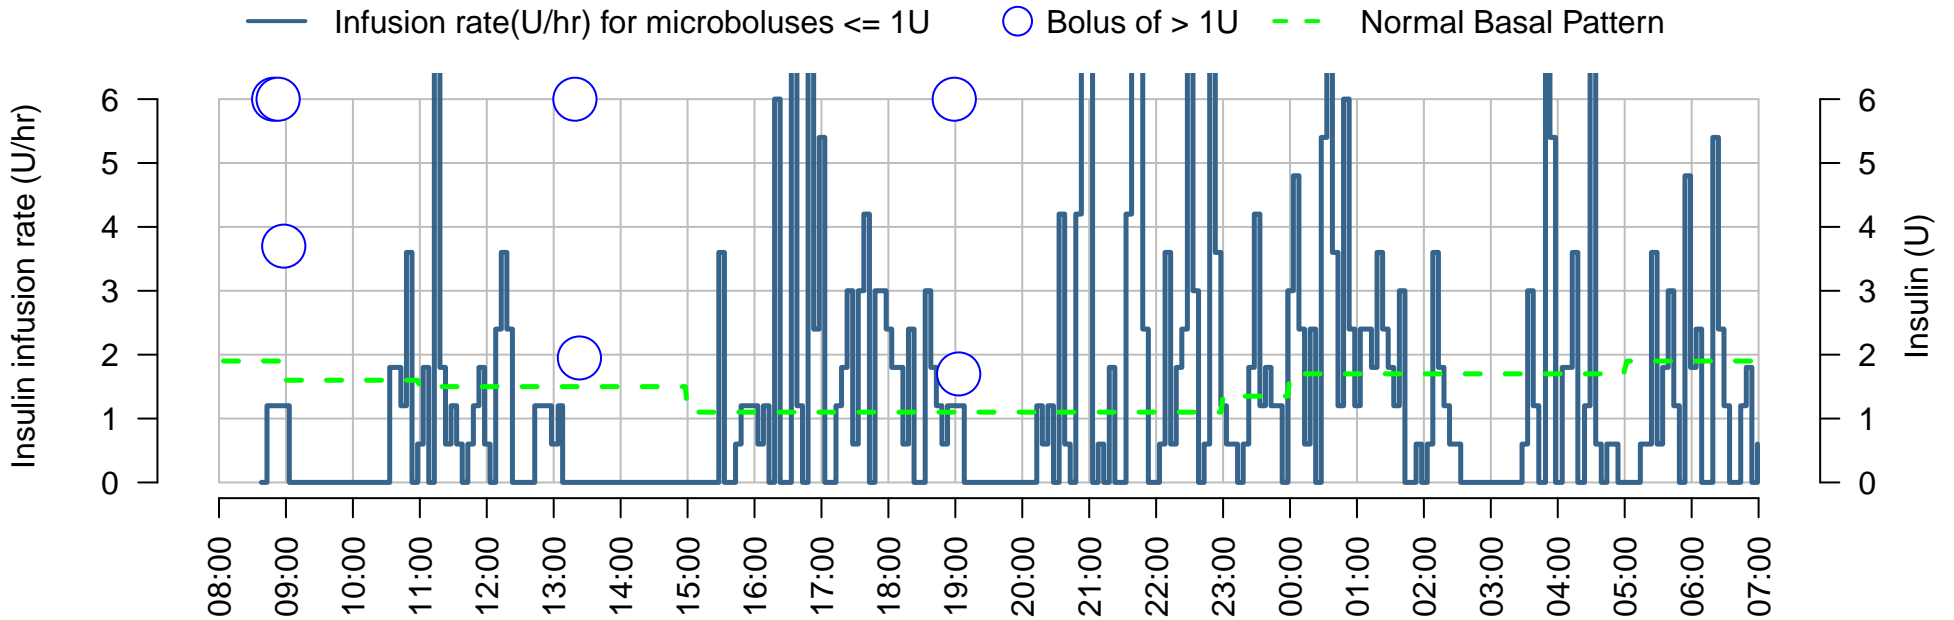

# Subject 27

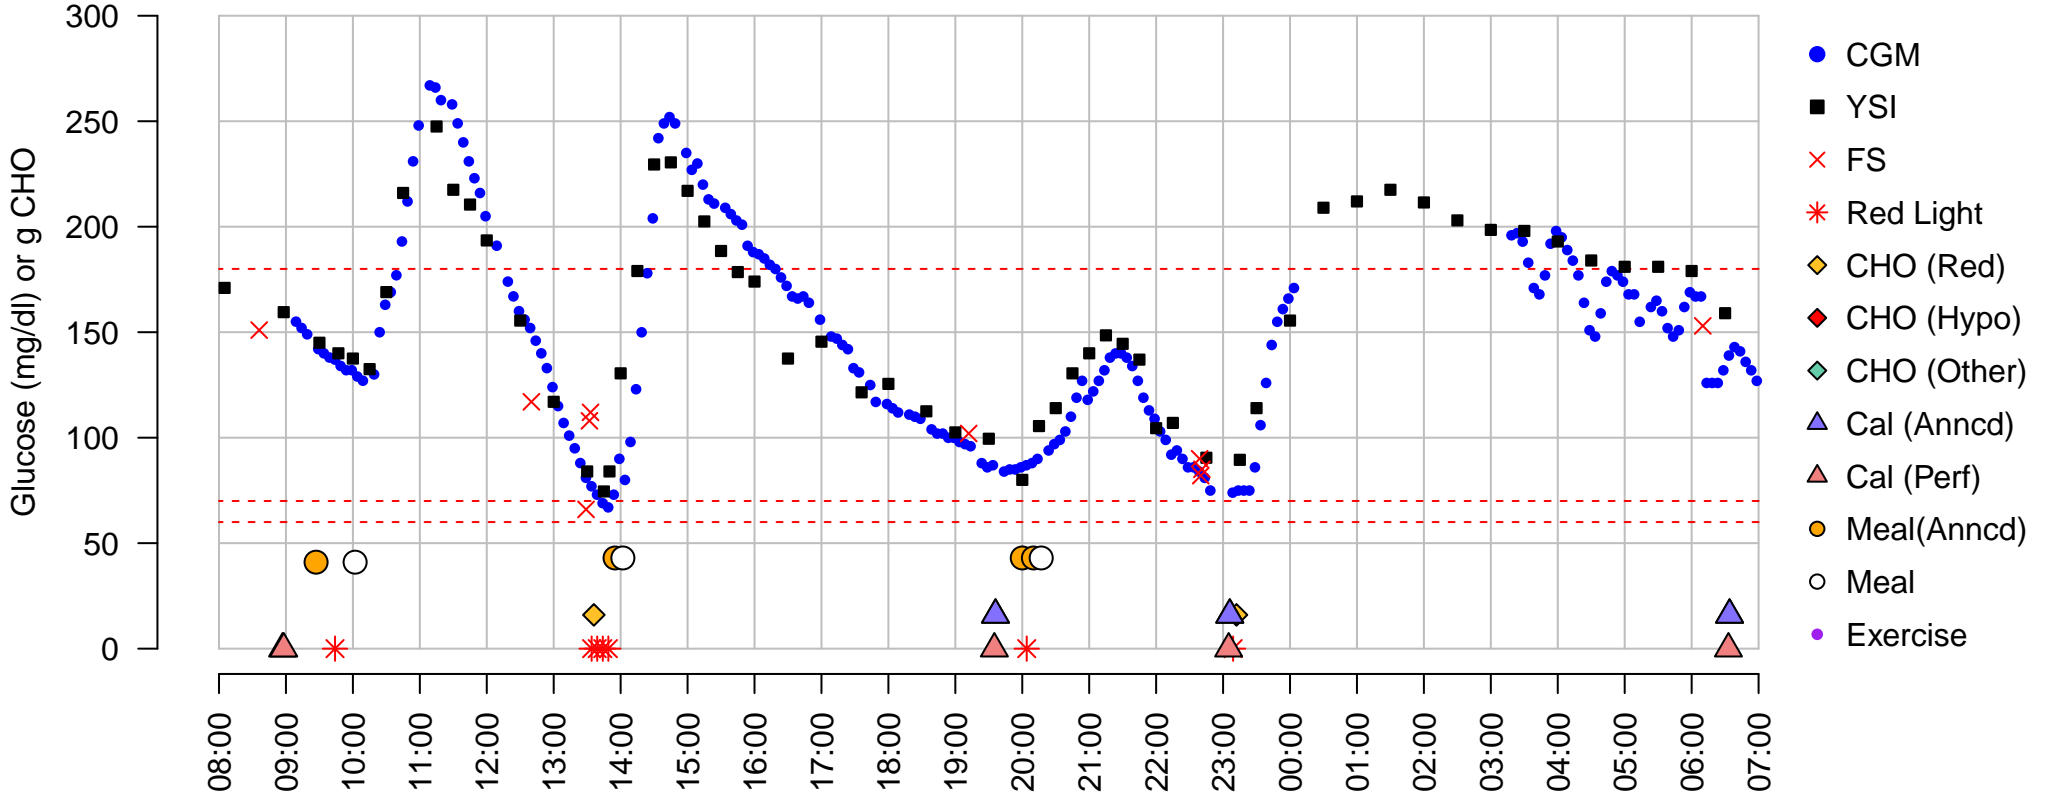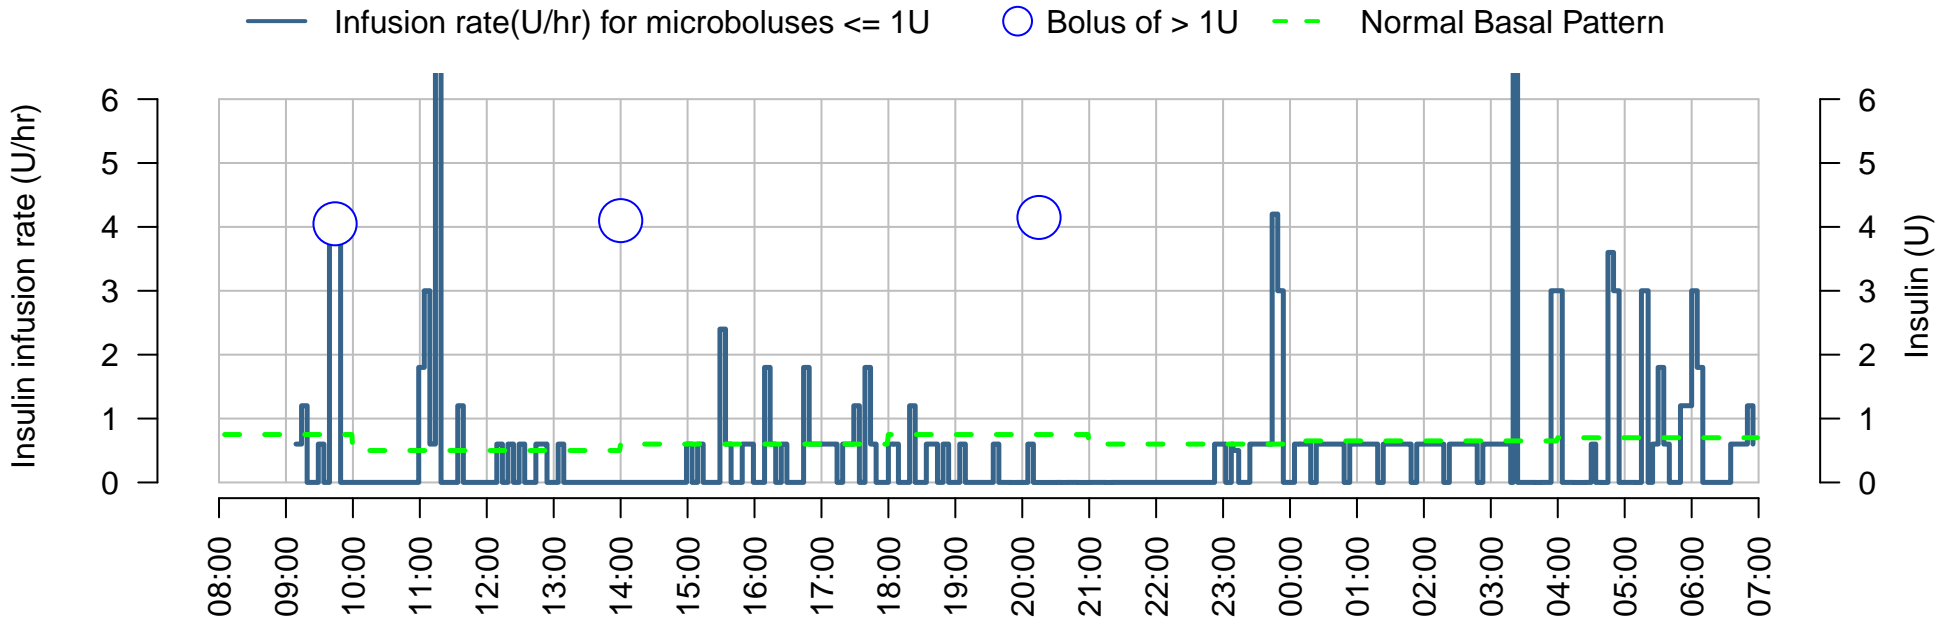

# Subject 28

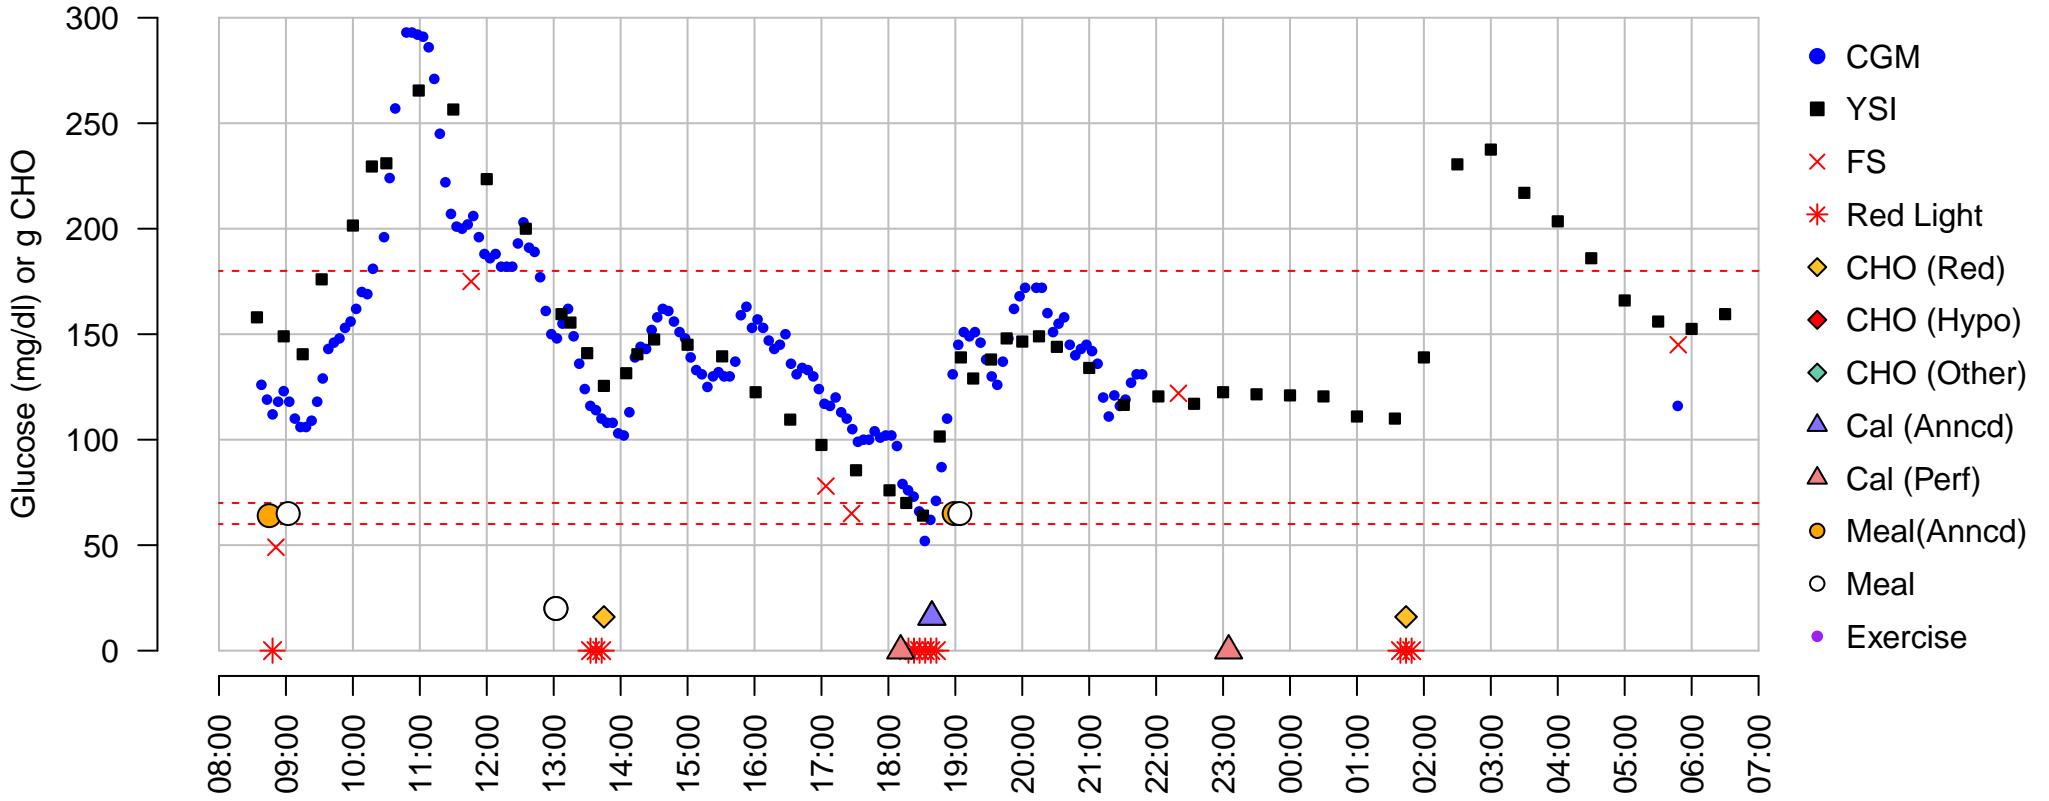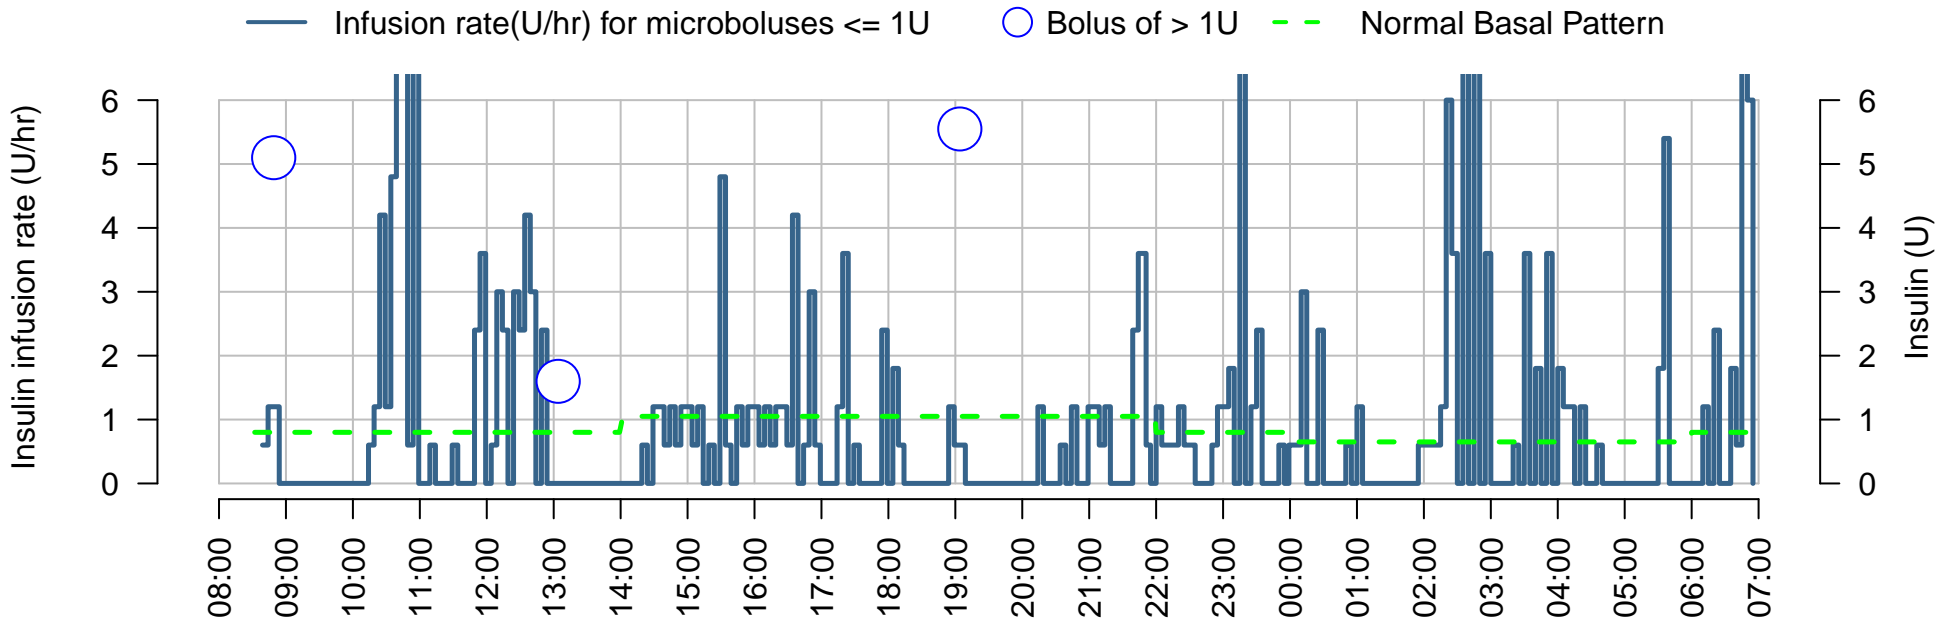

# Subject 29

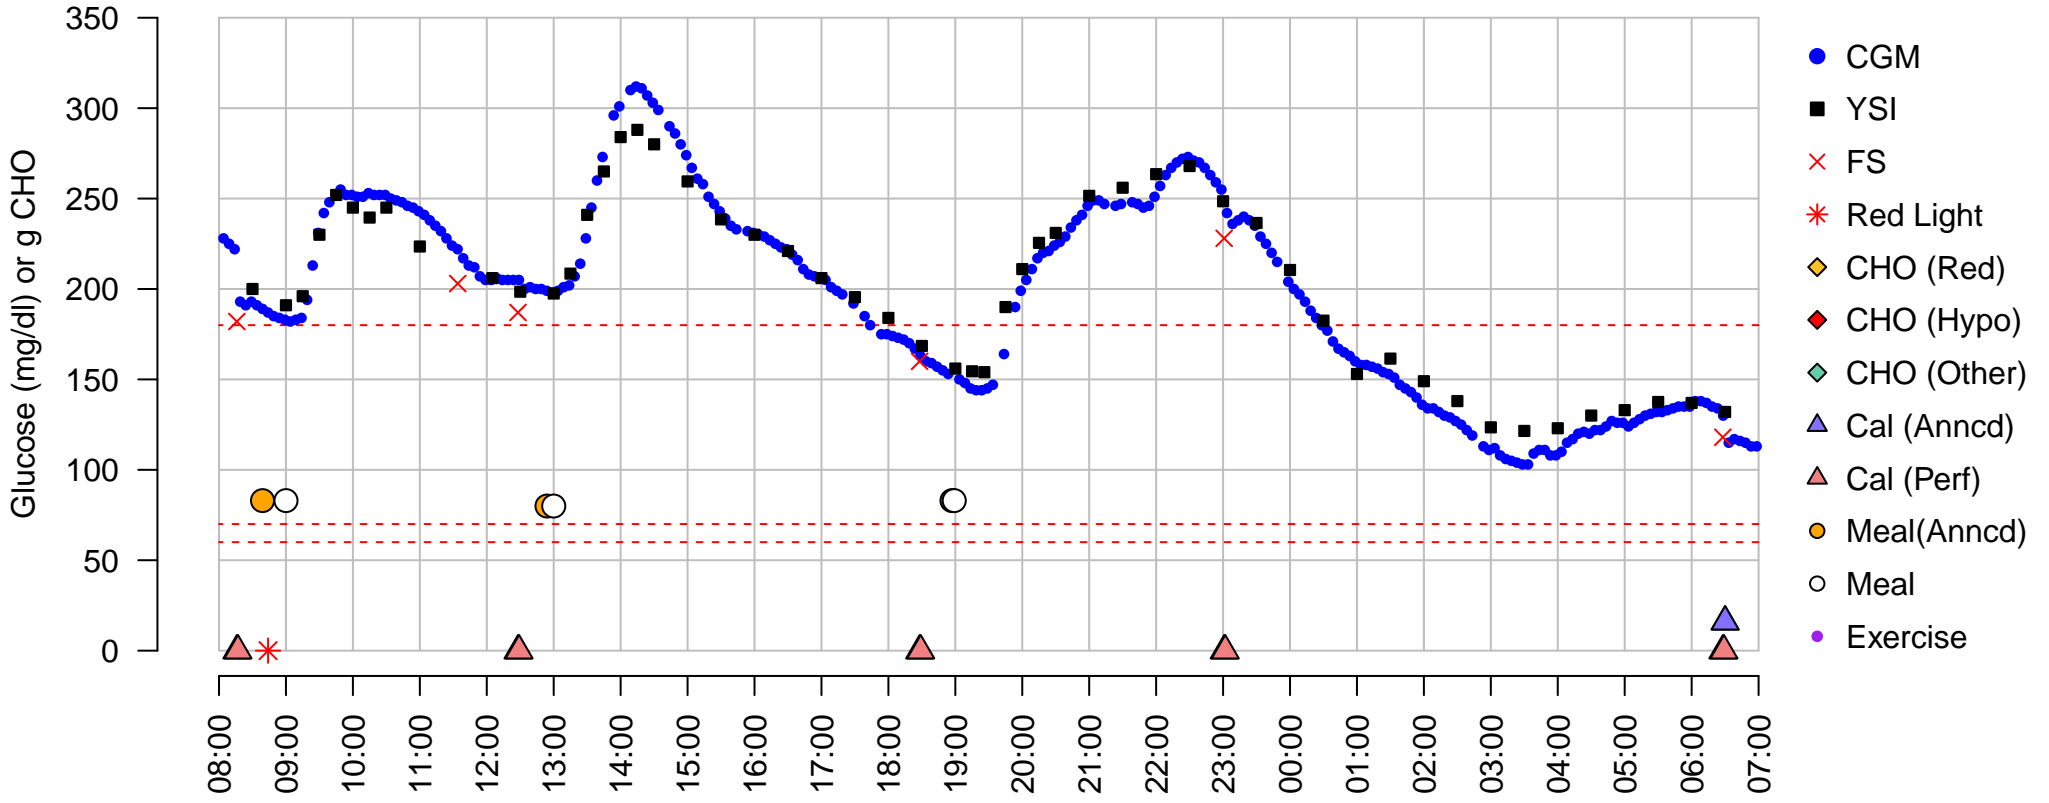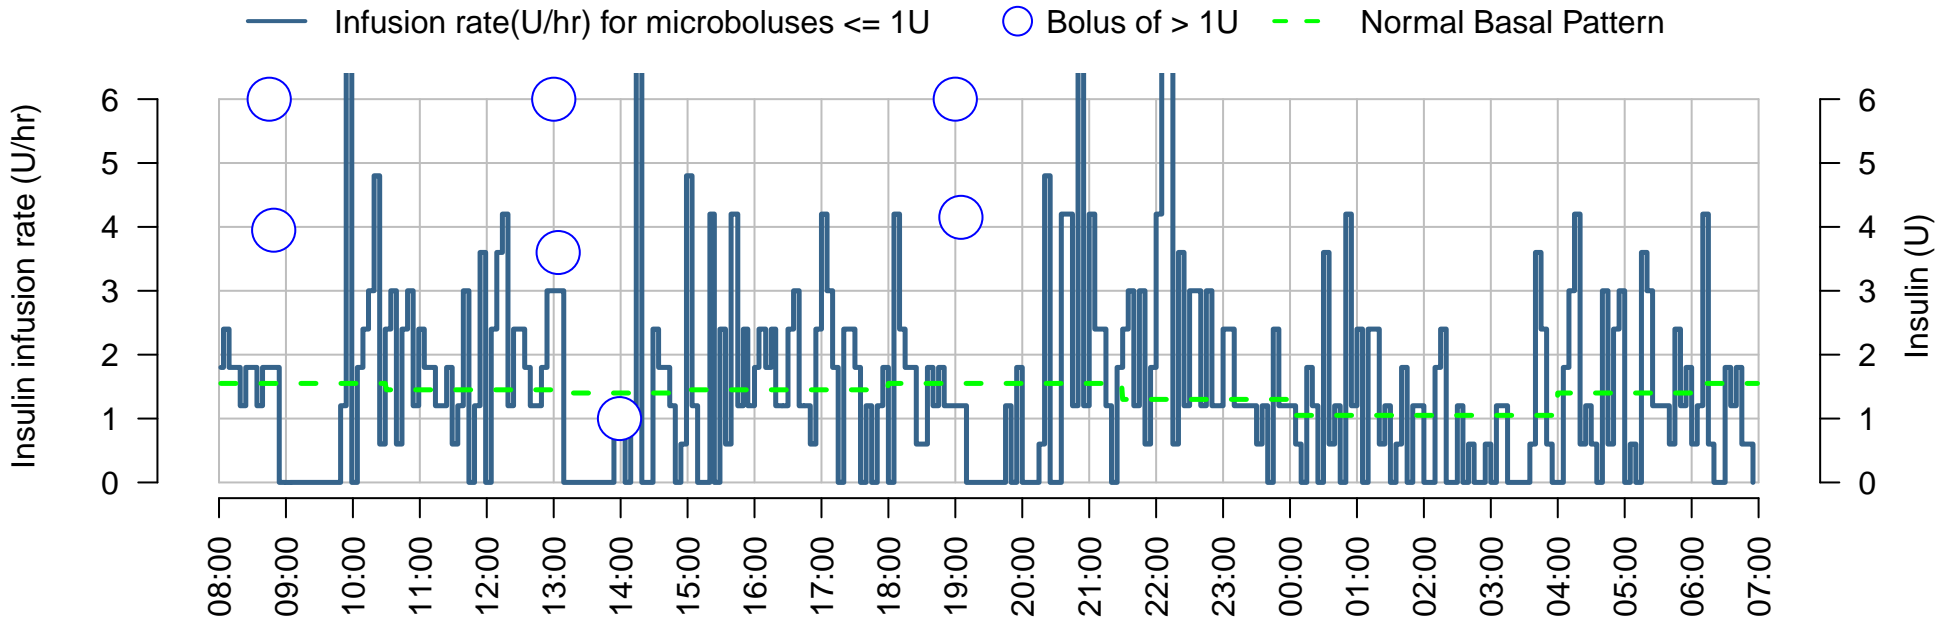

# Subject 30

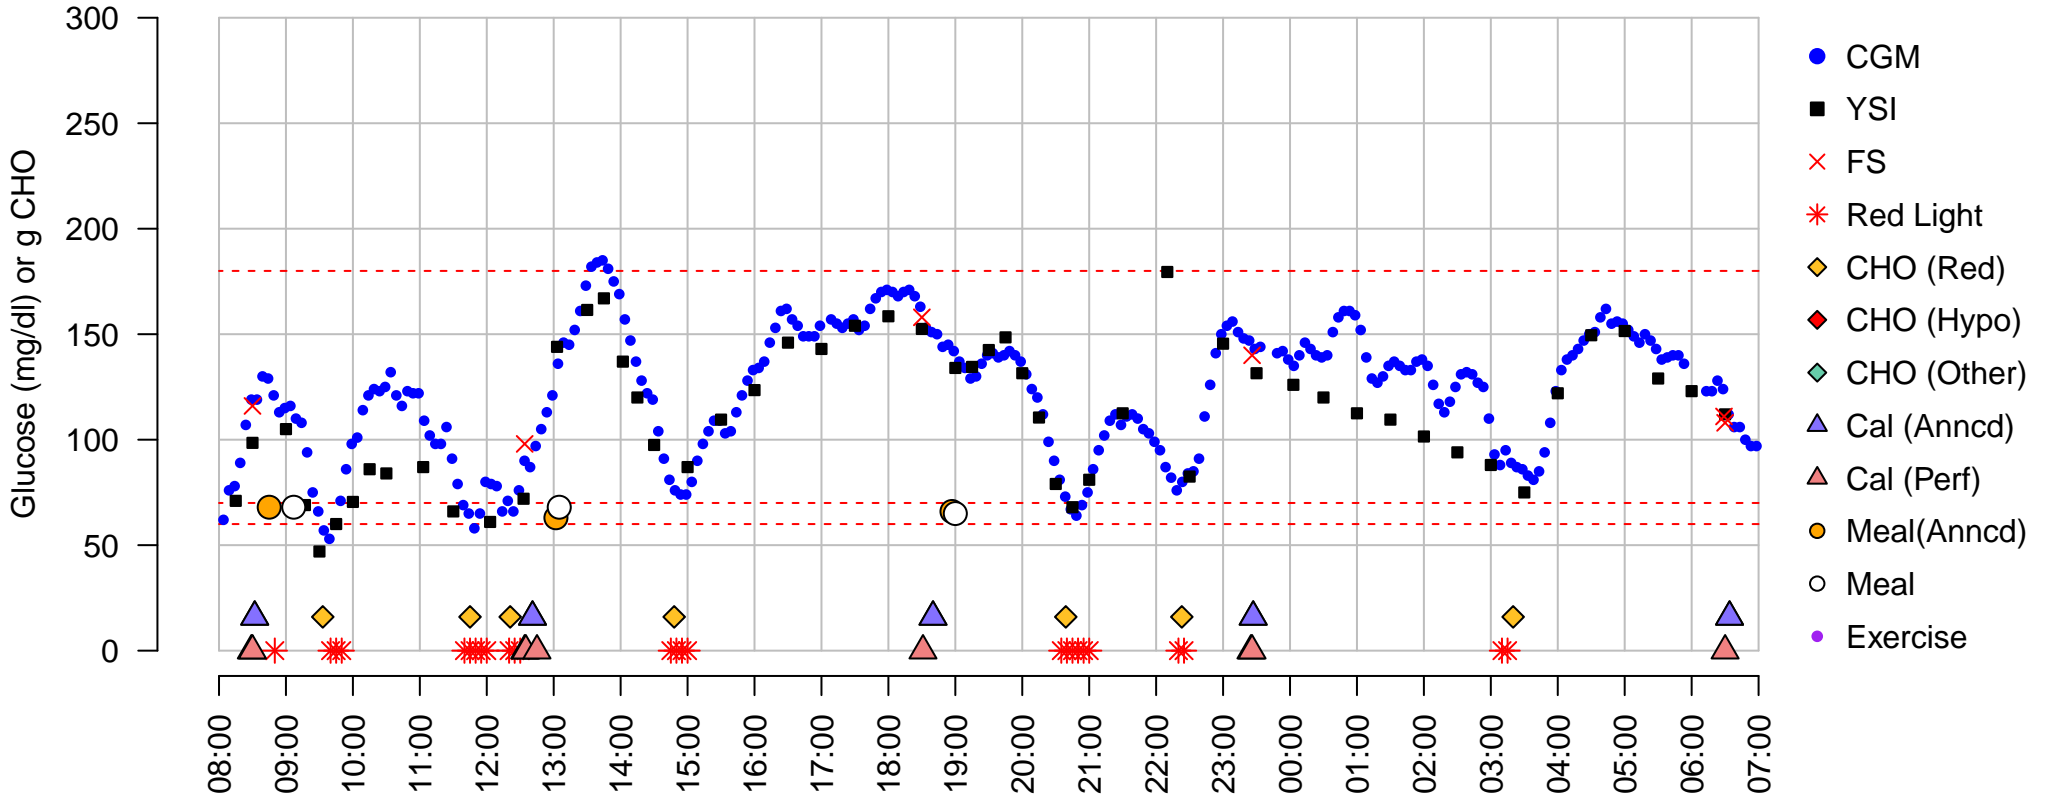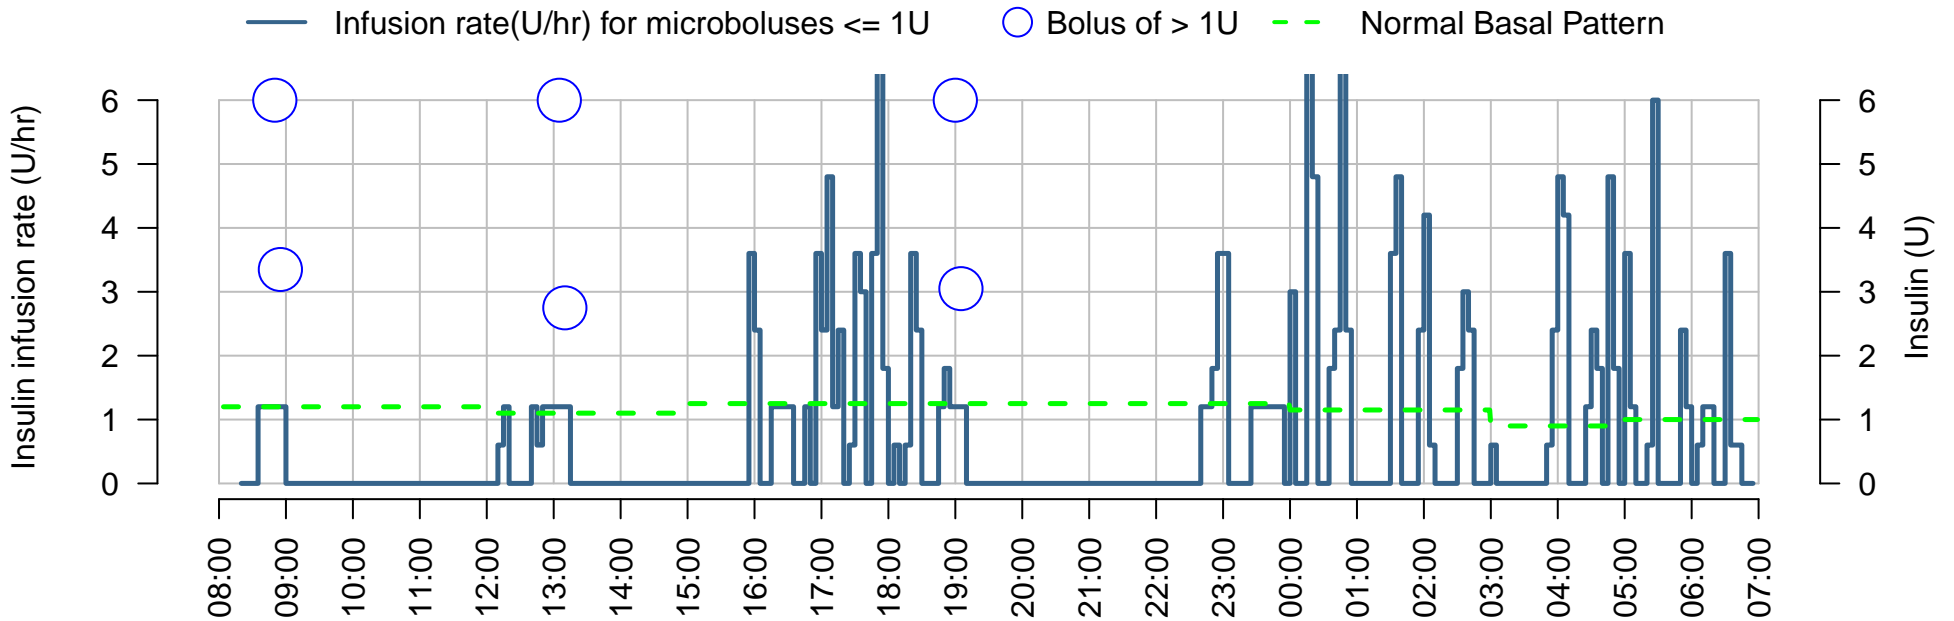

# Subject 31

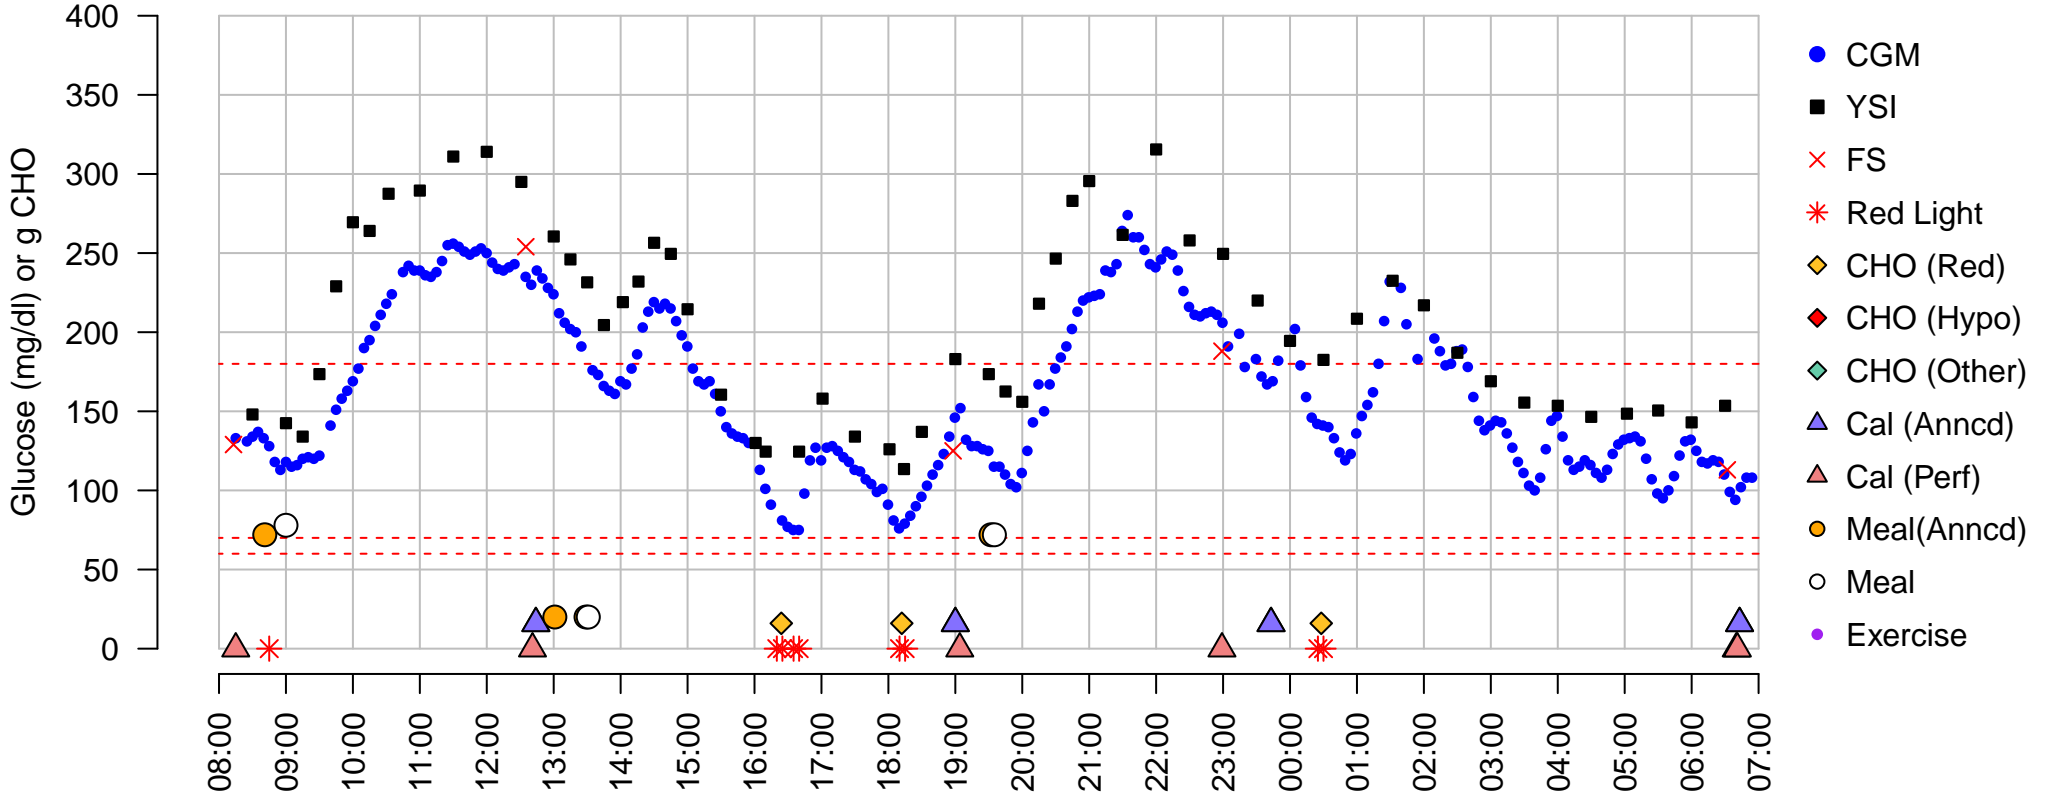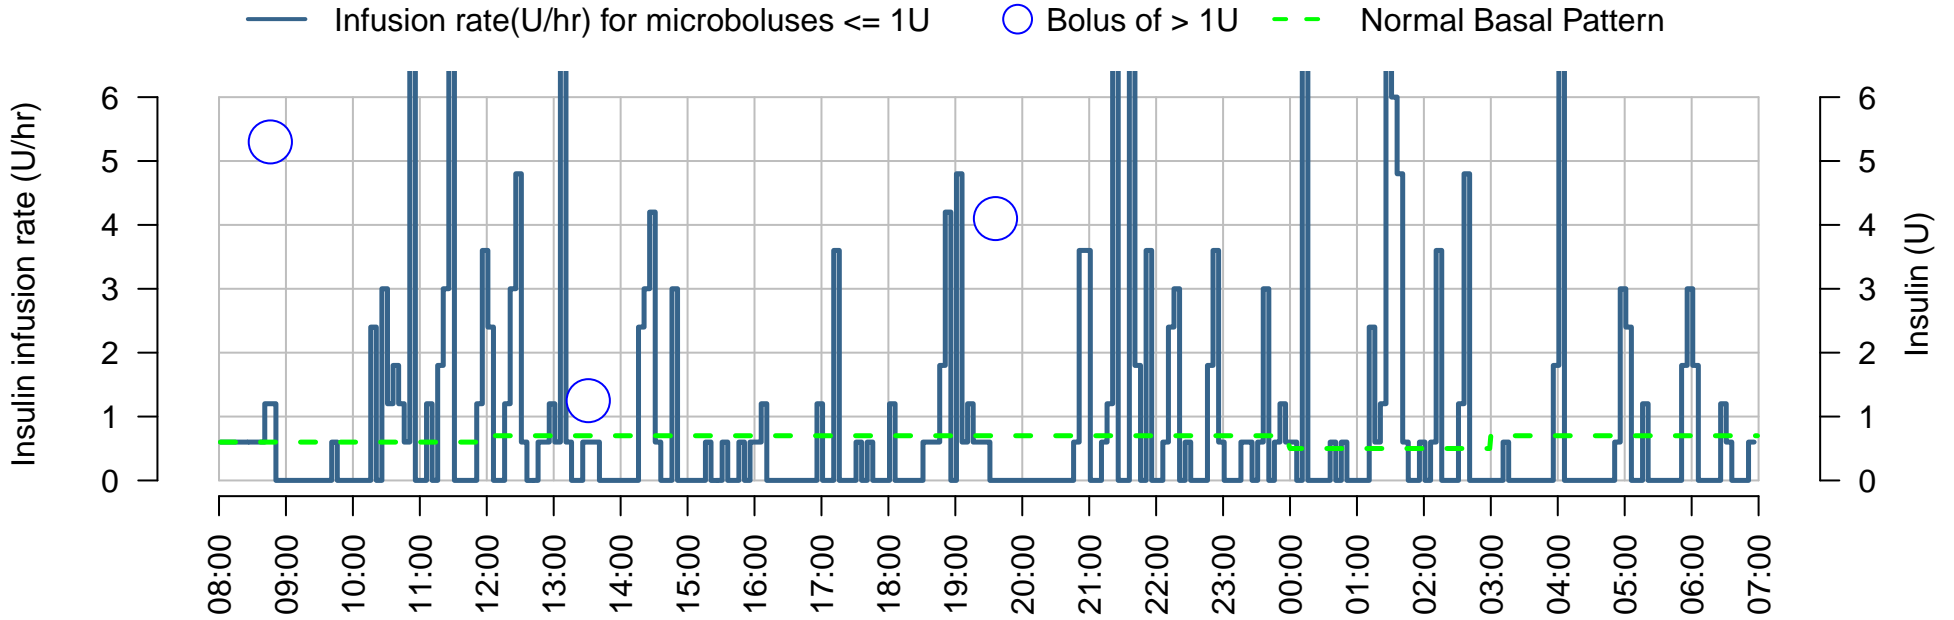



# Subject 32

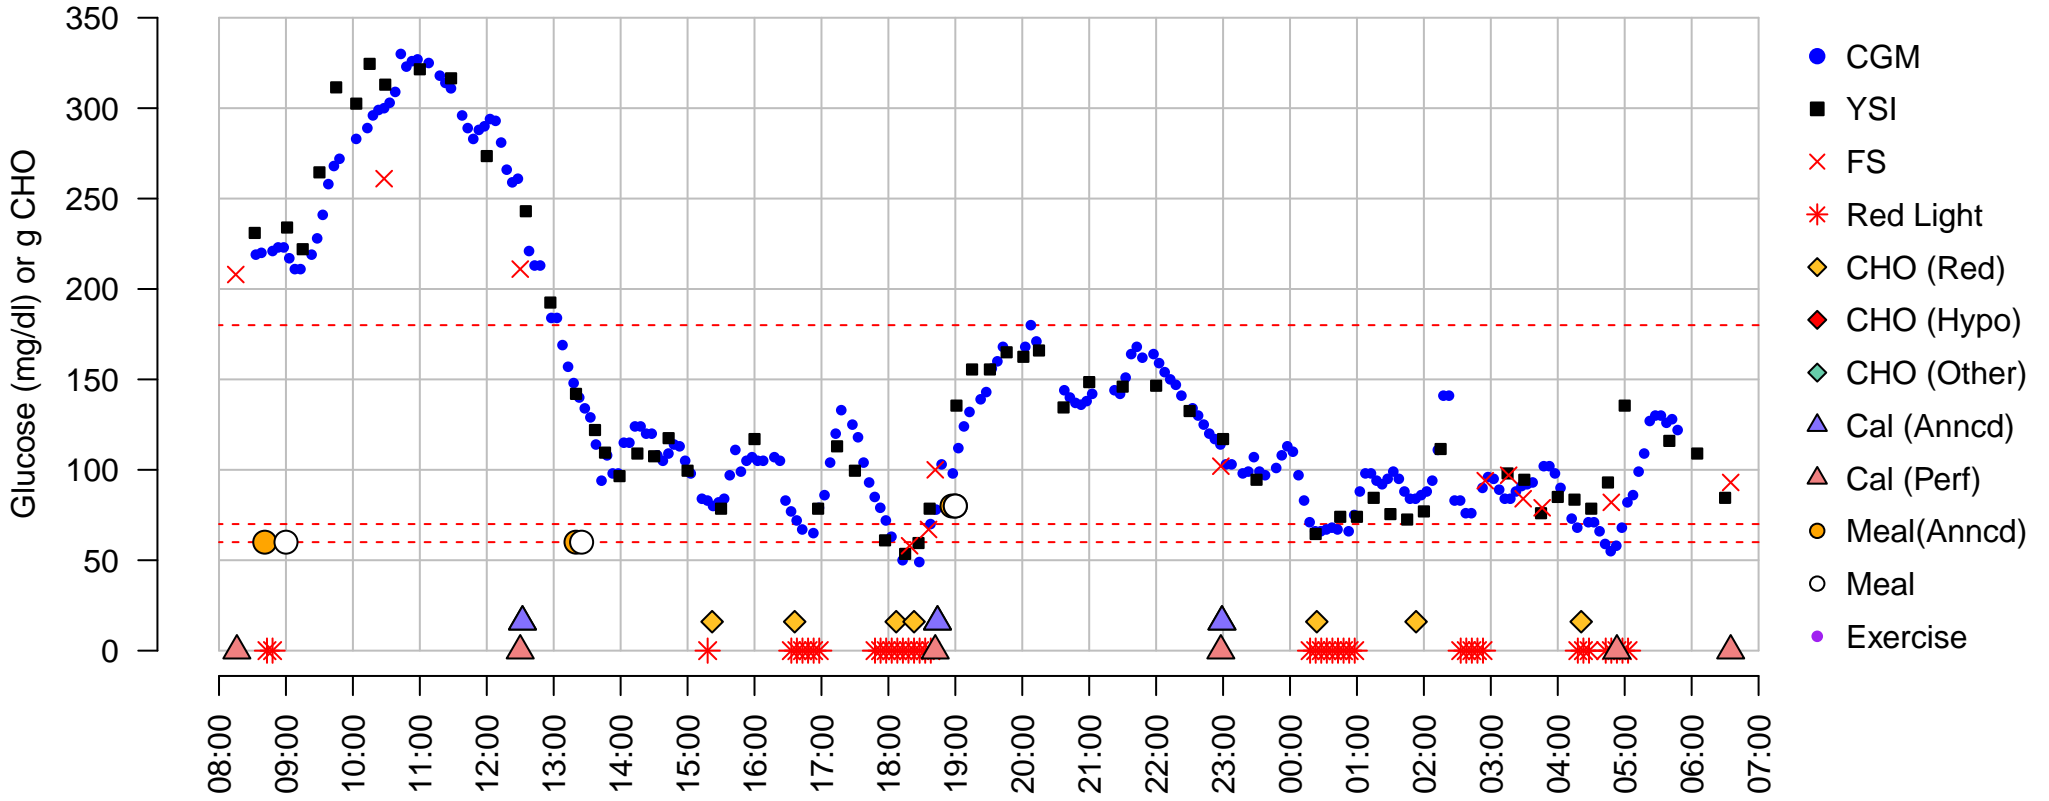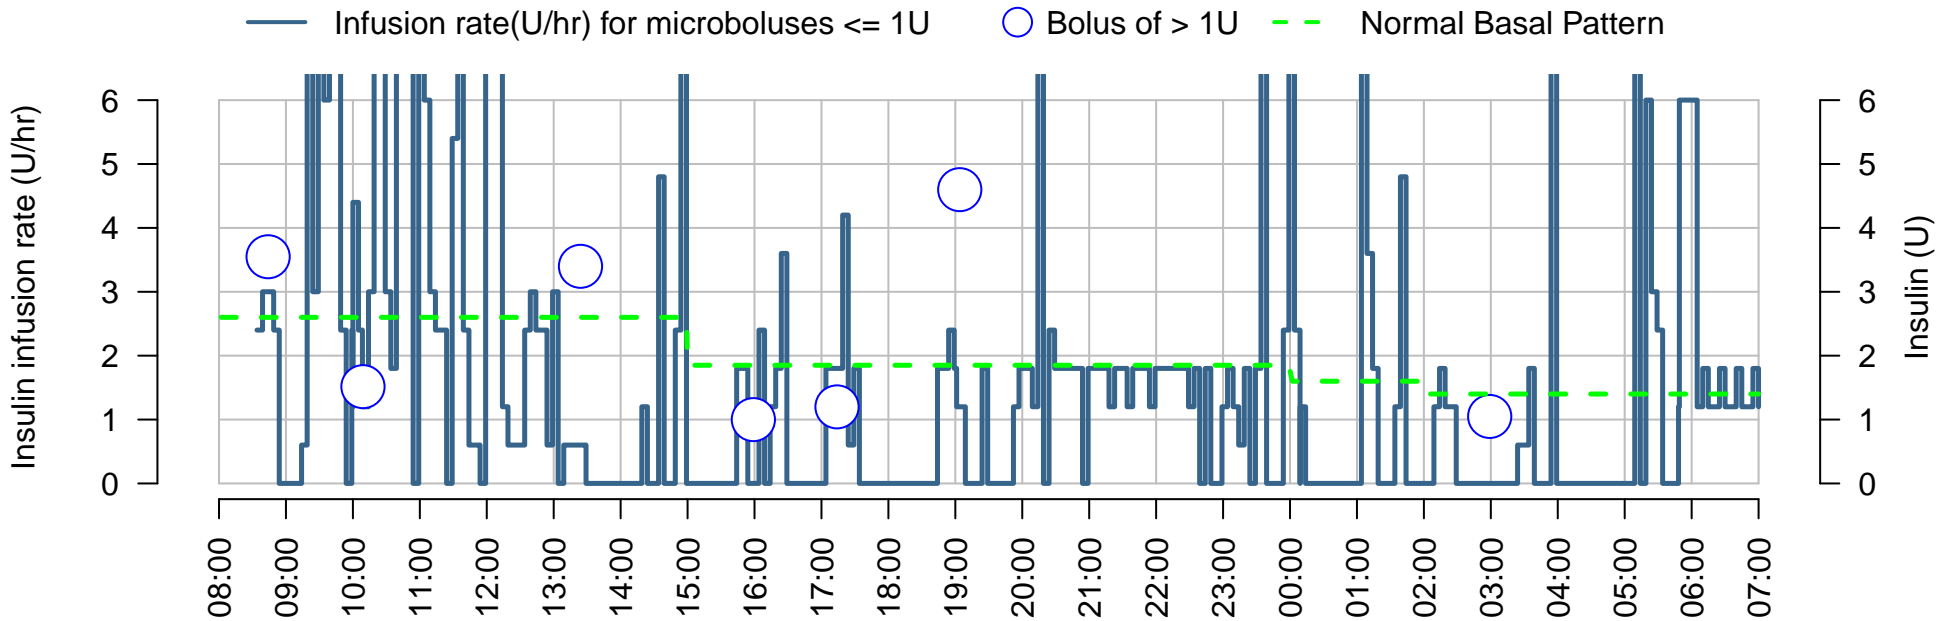

# Subject 33

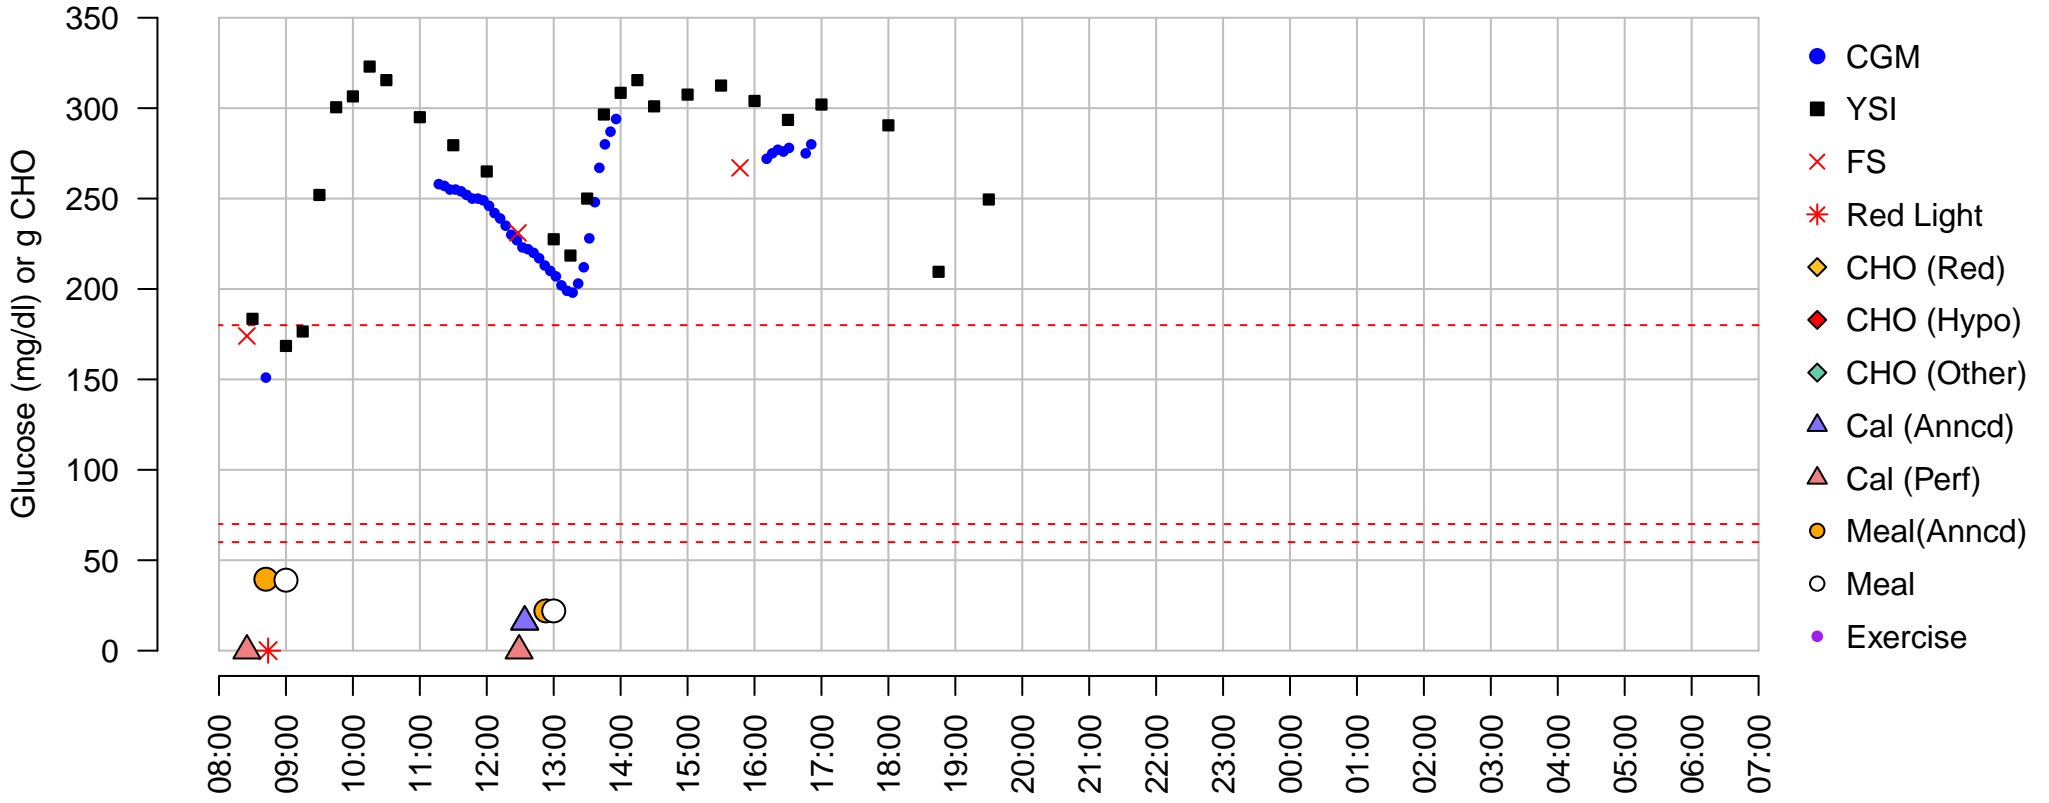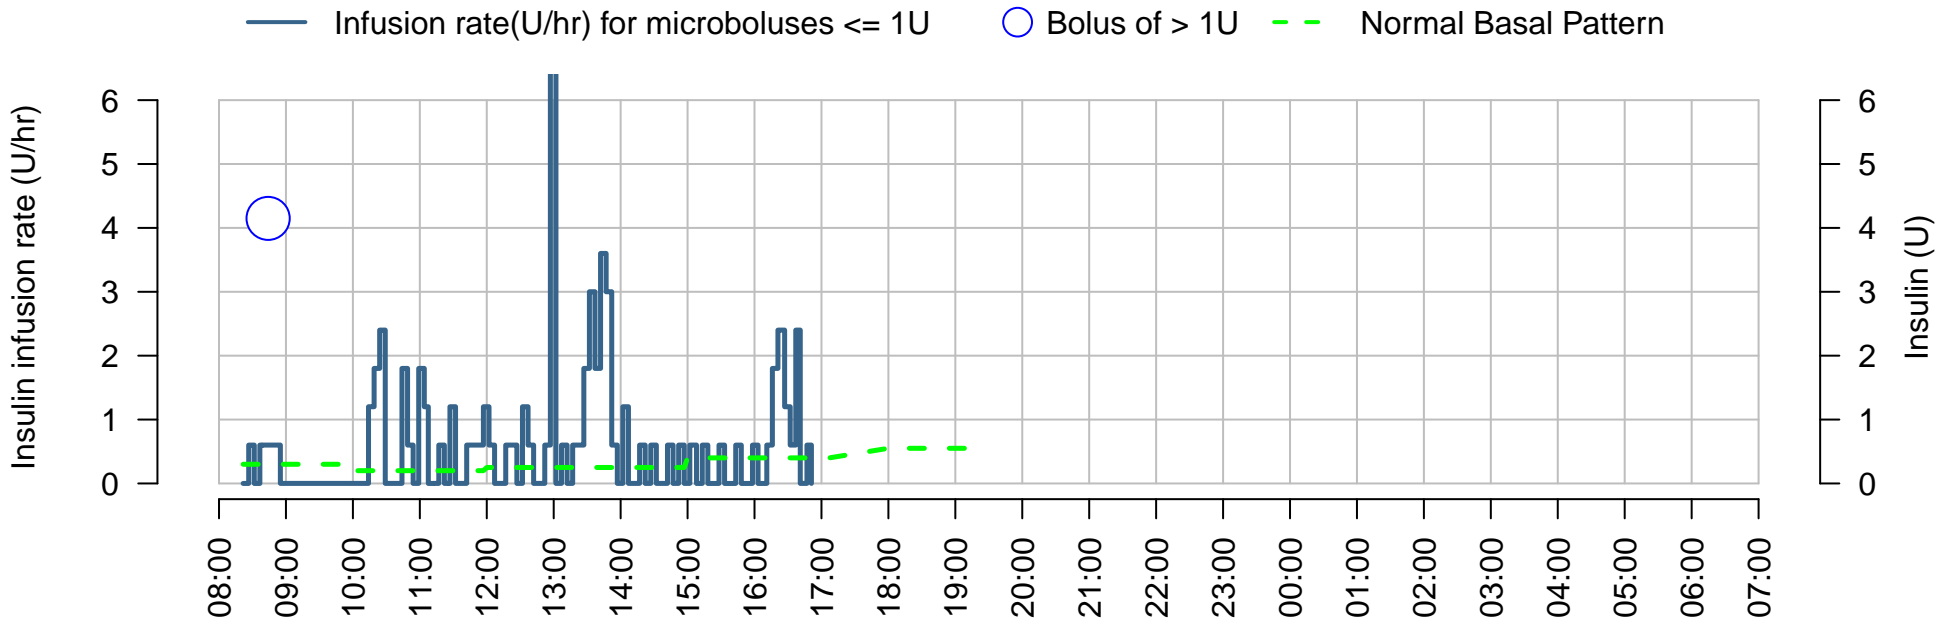

# Subject 34

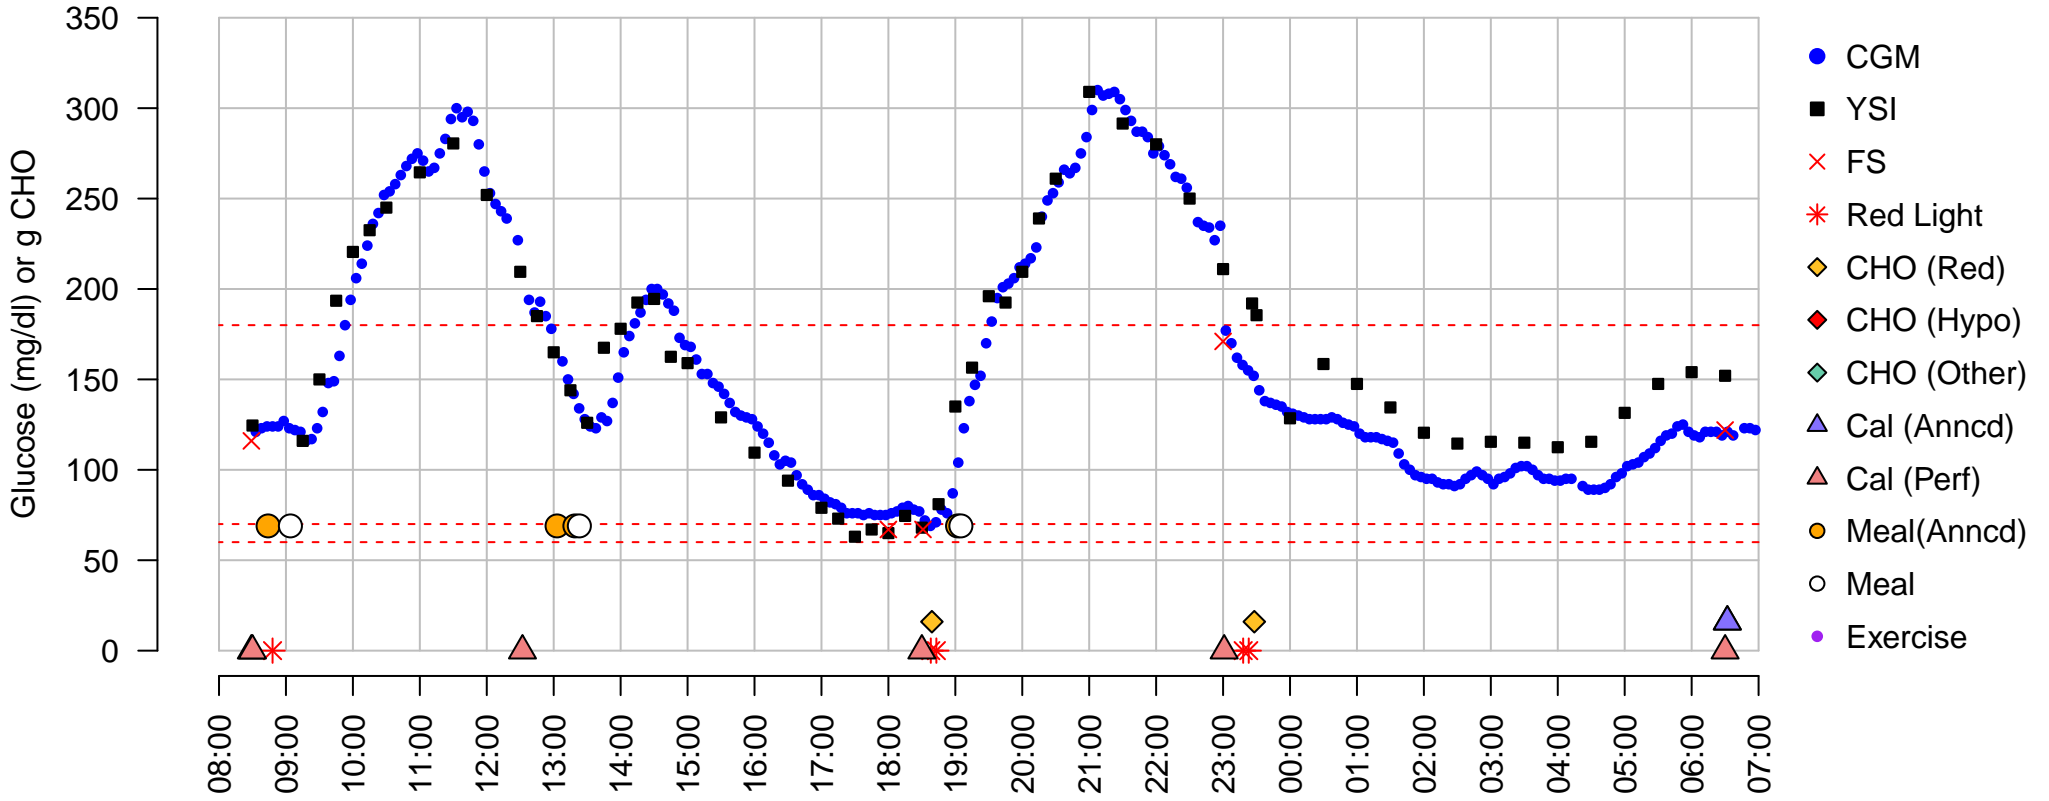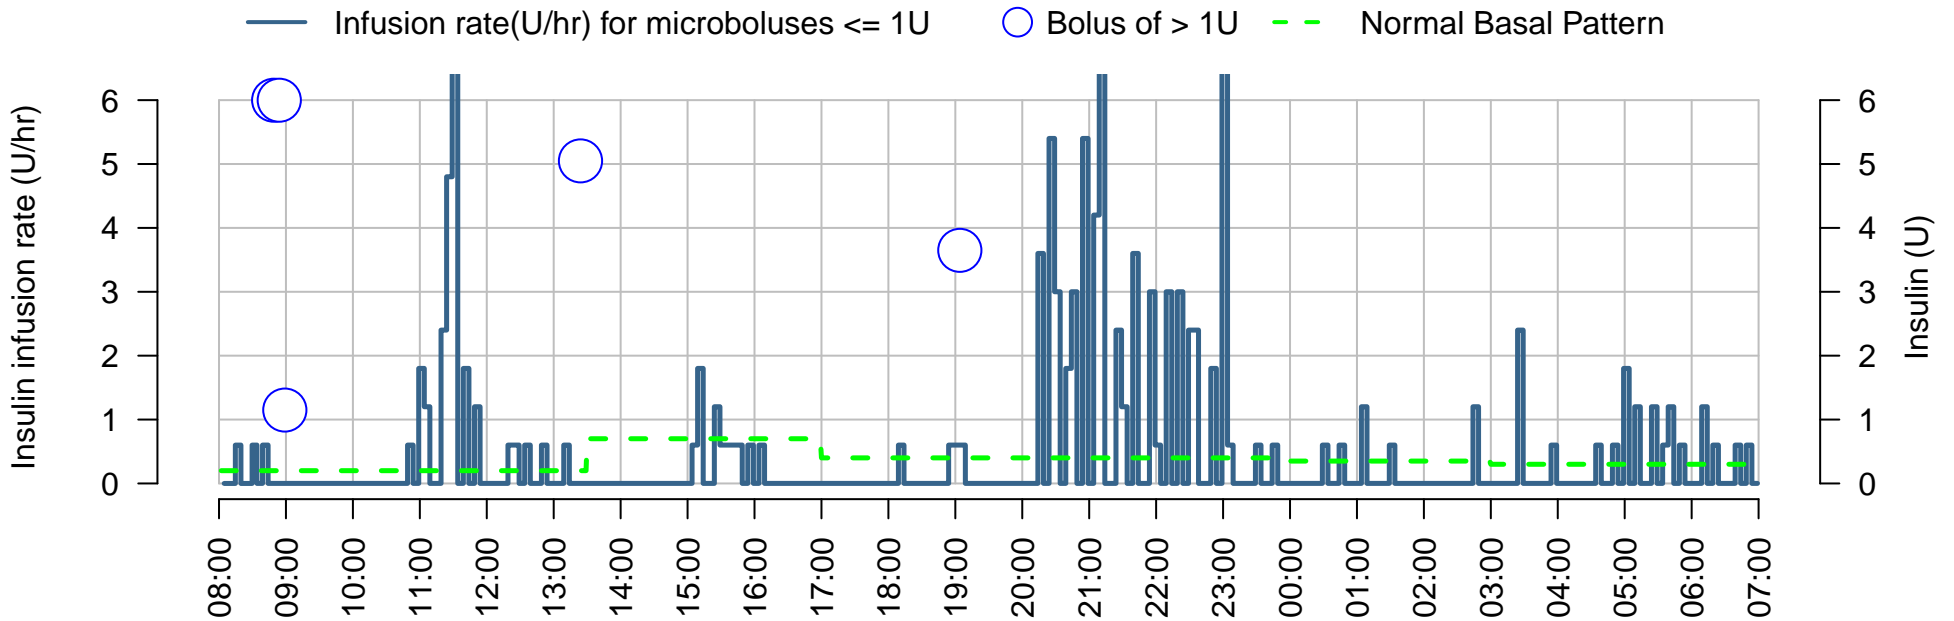

# Subject 35

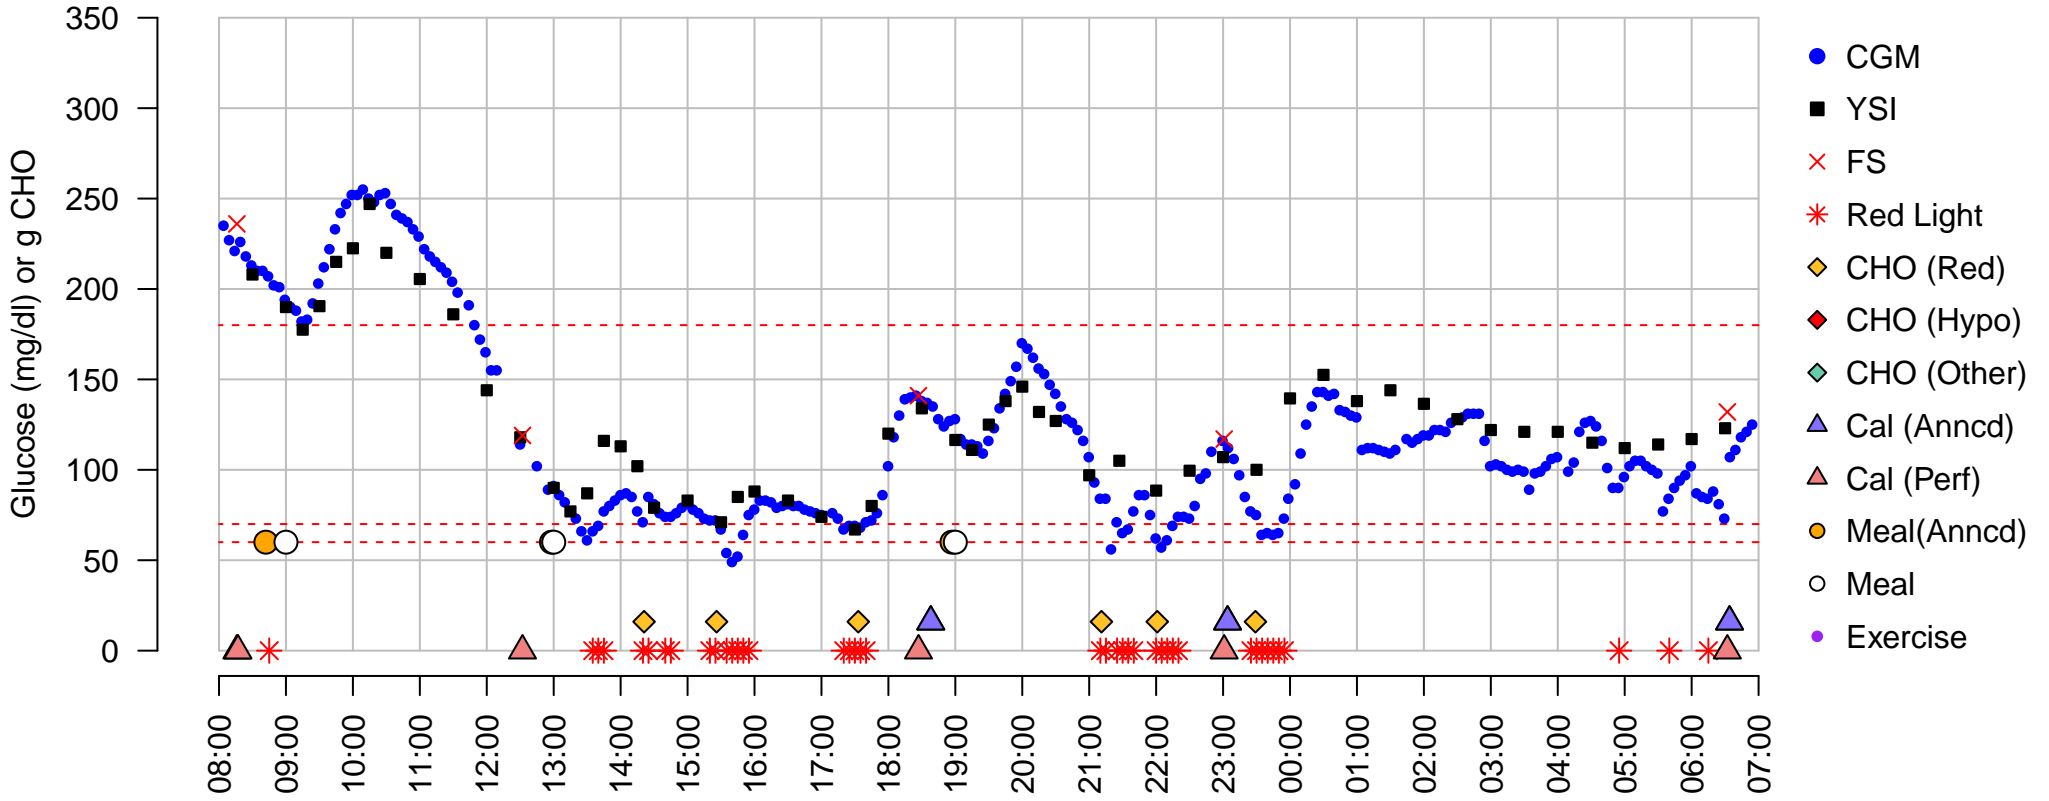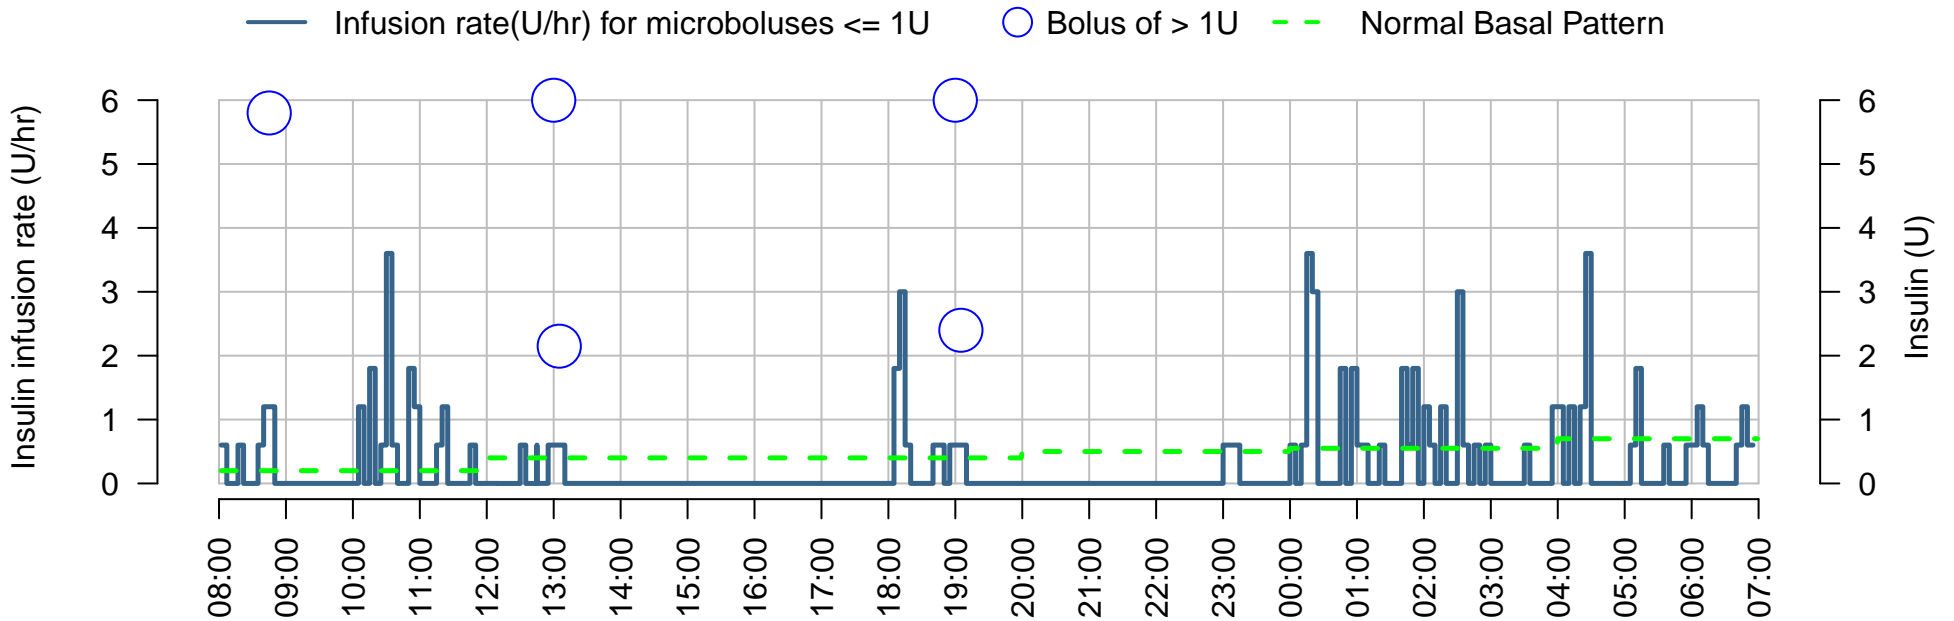

# Subject 36

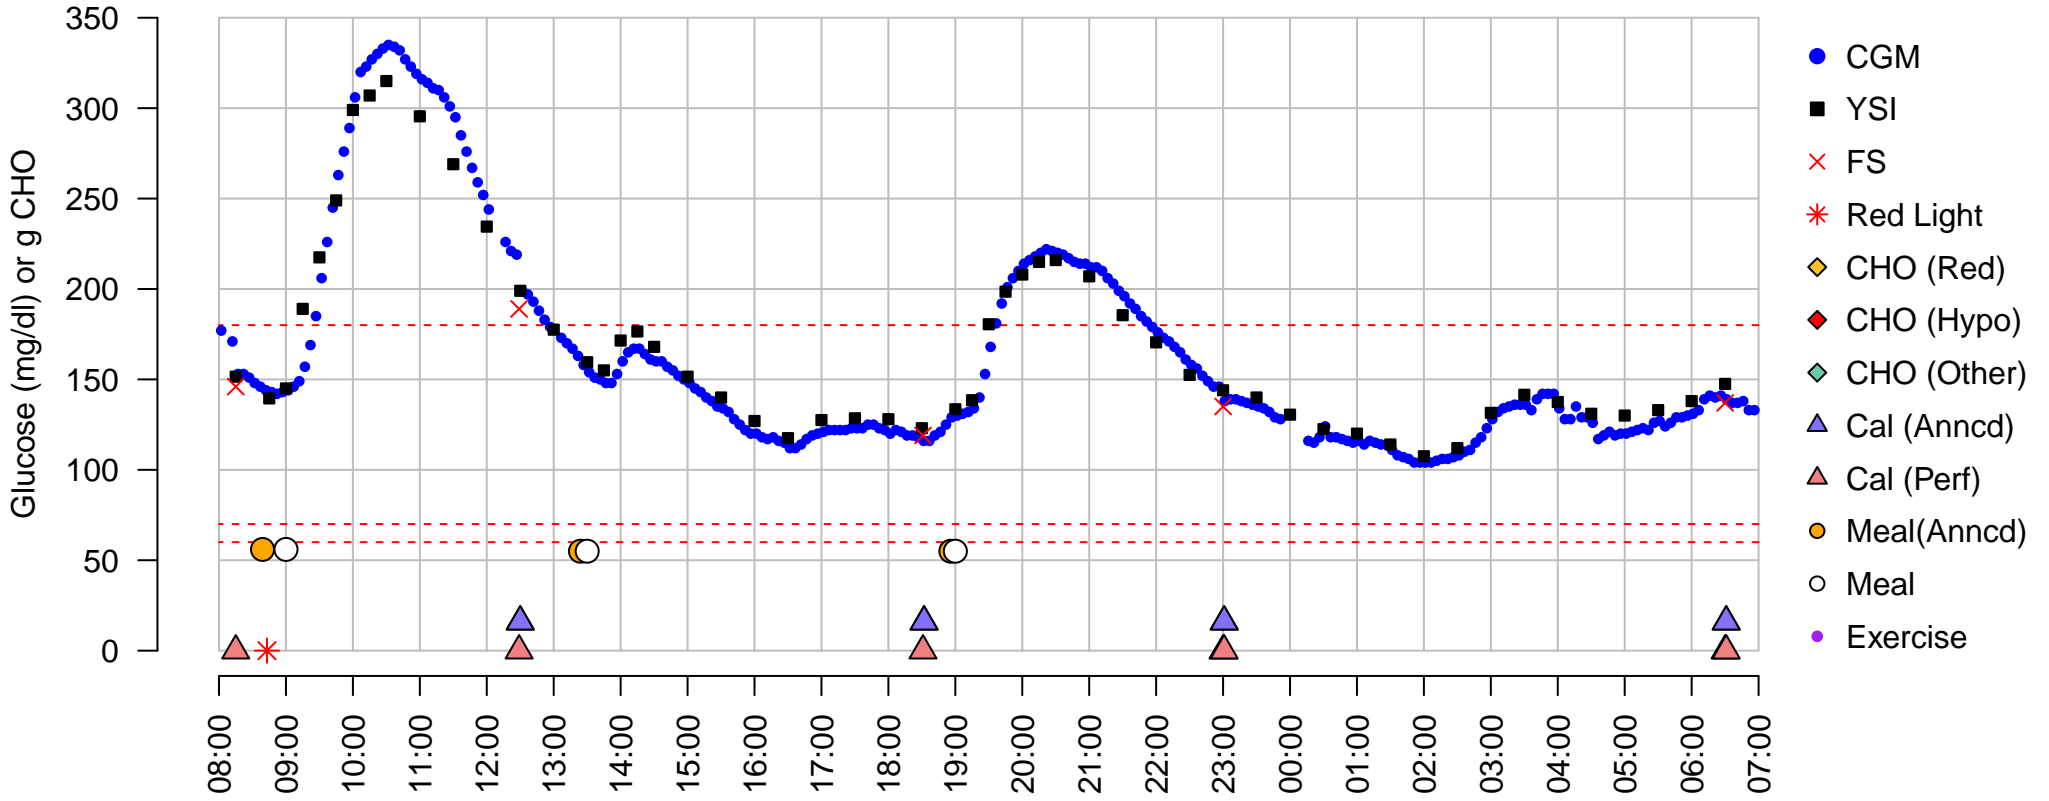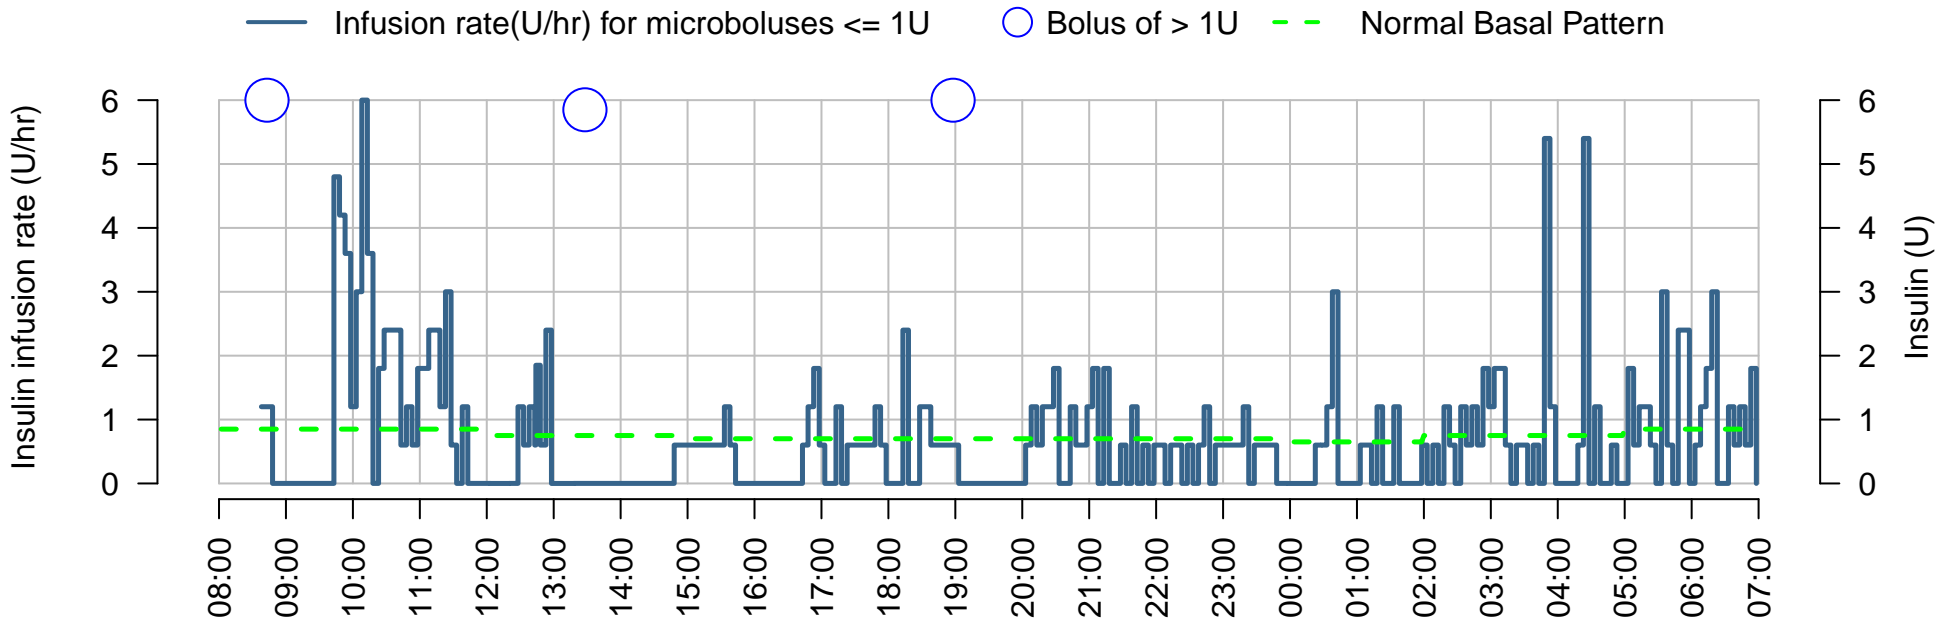

# Subject 37

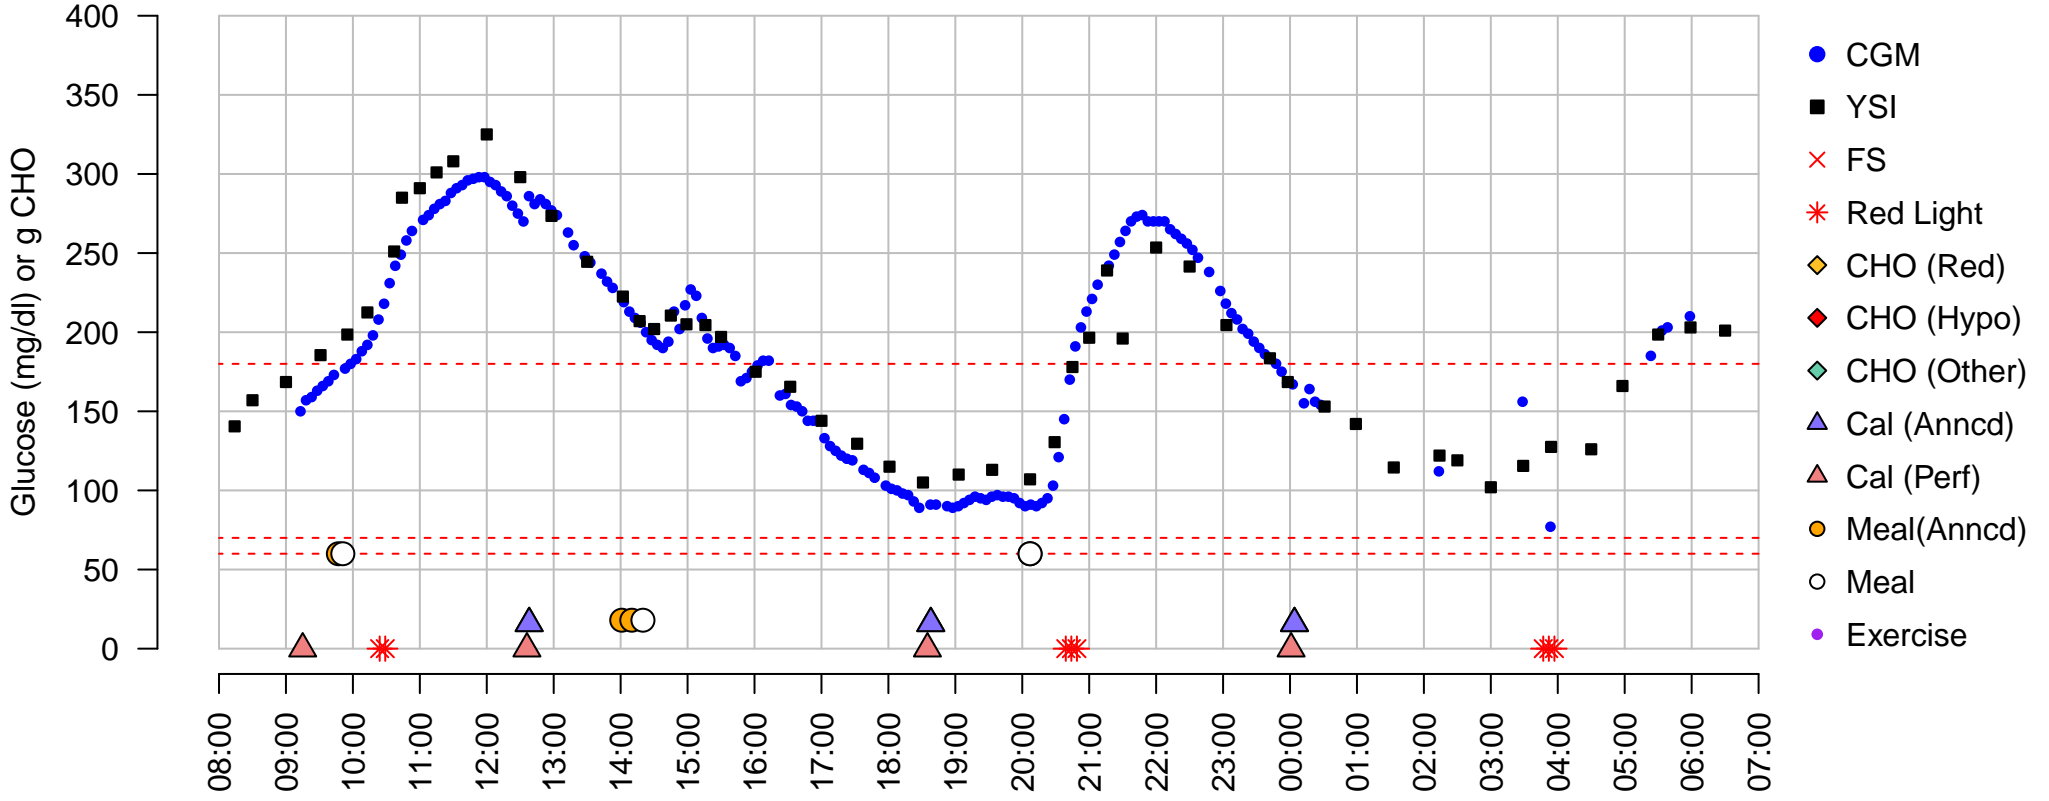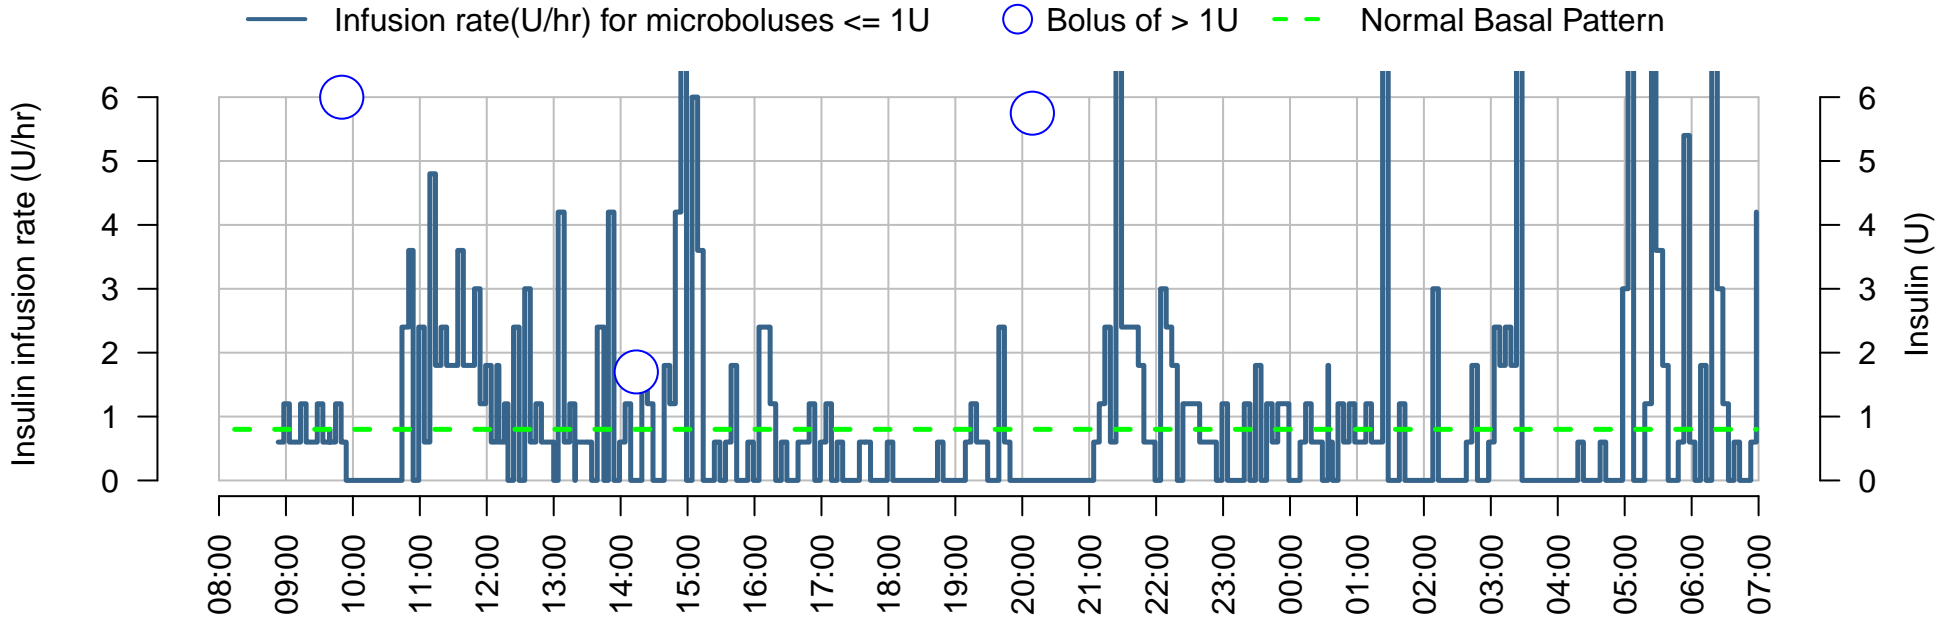

# Subject 38

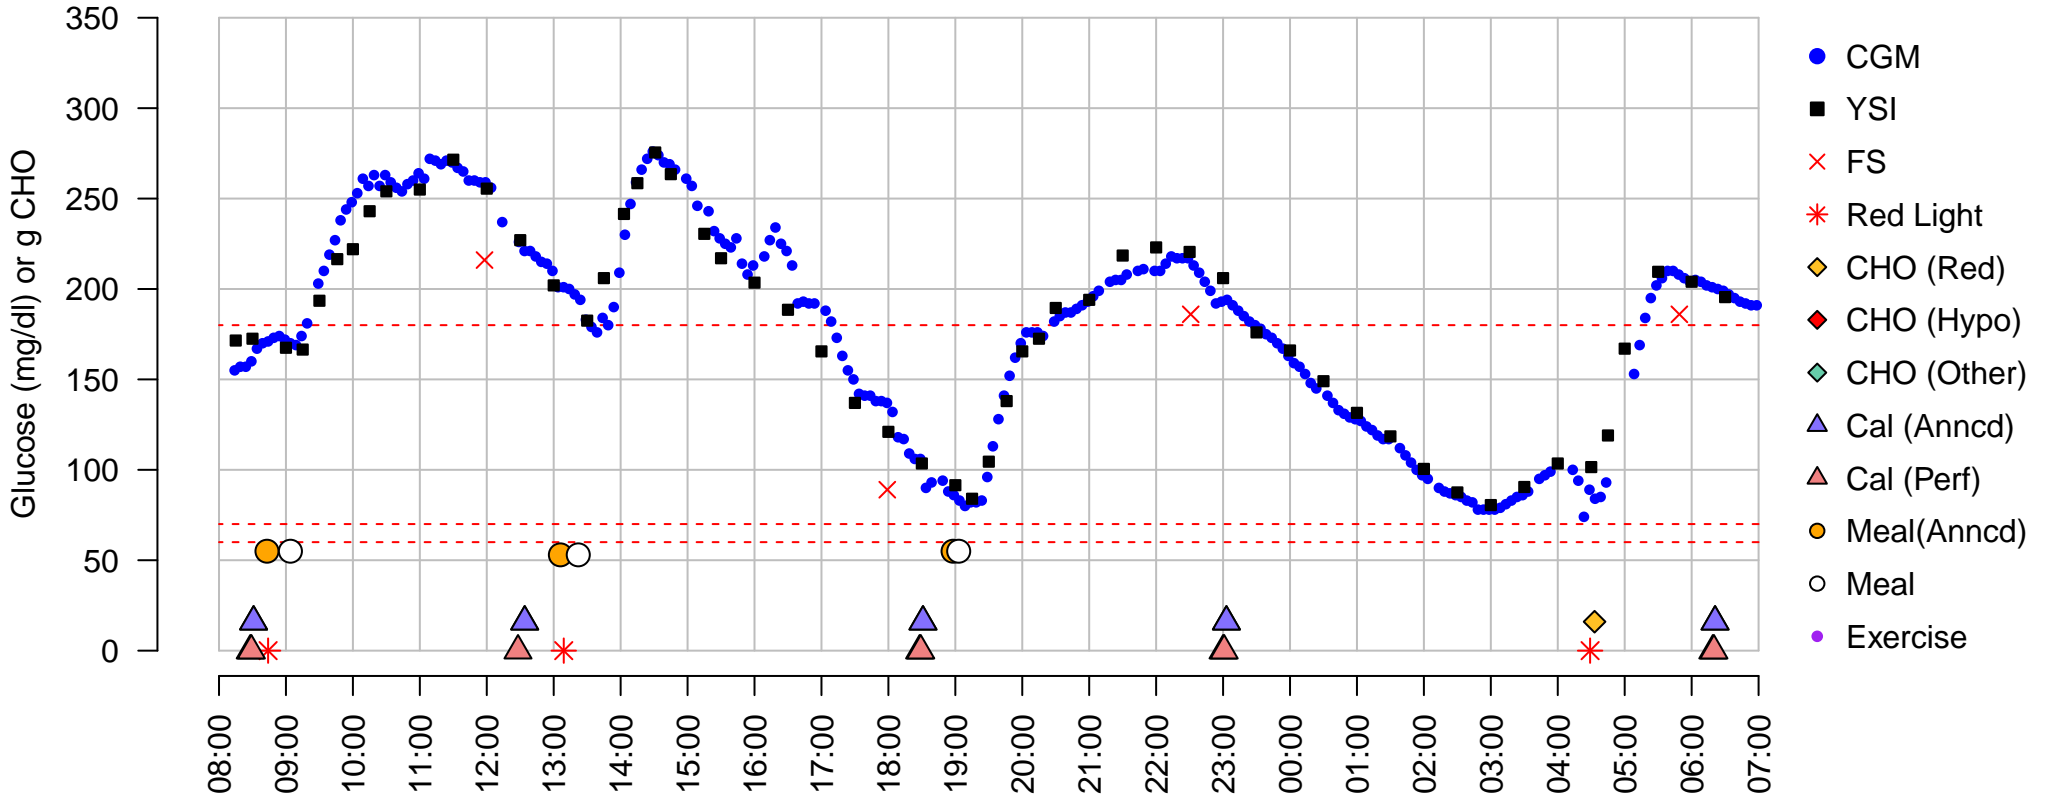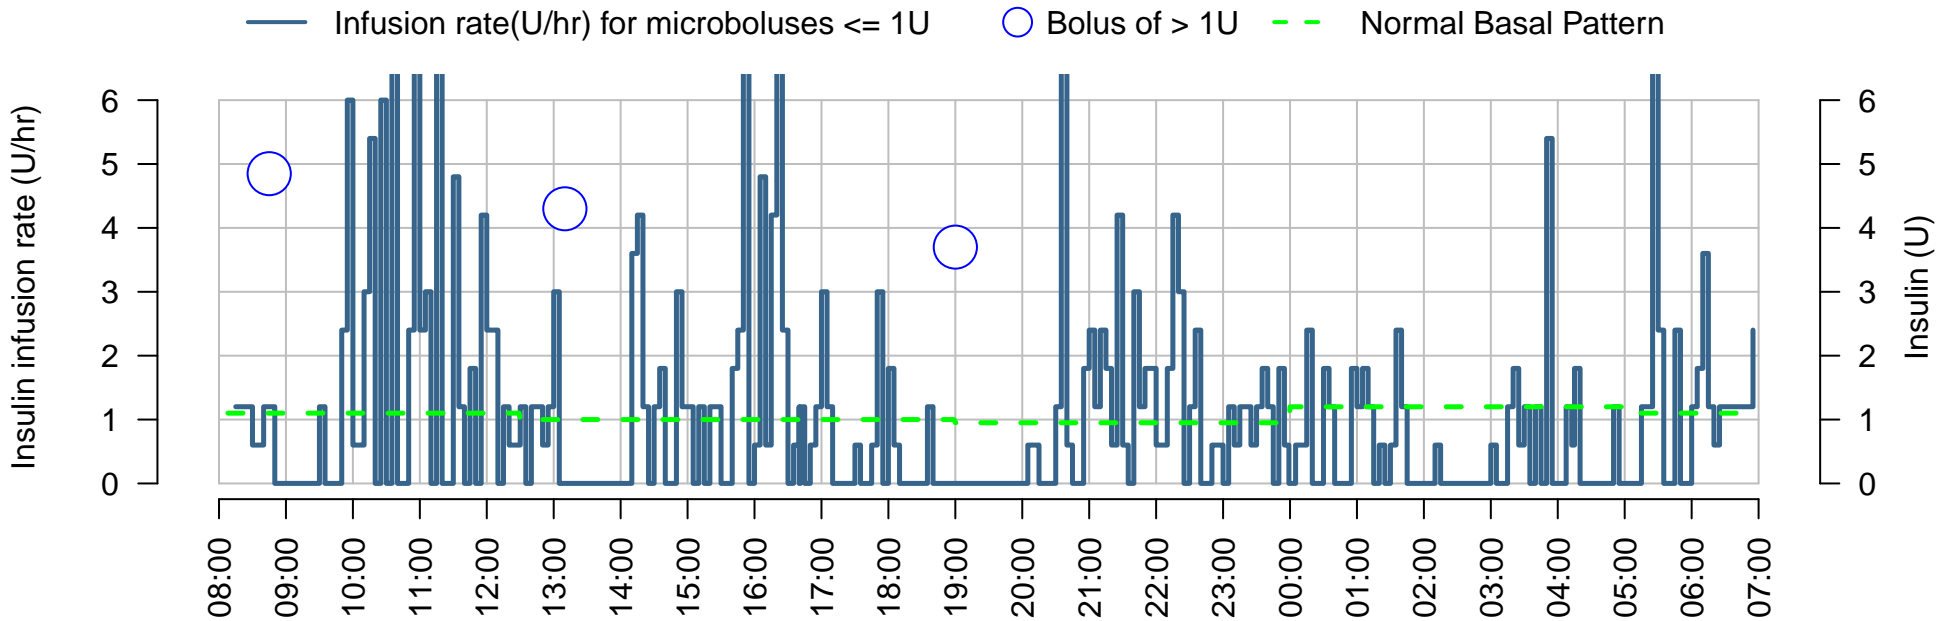

# Subject 39

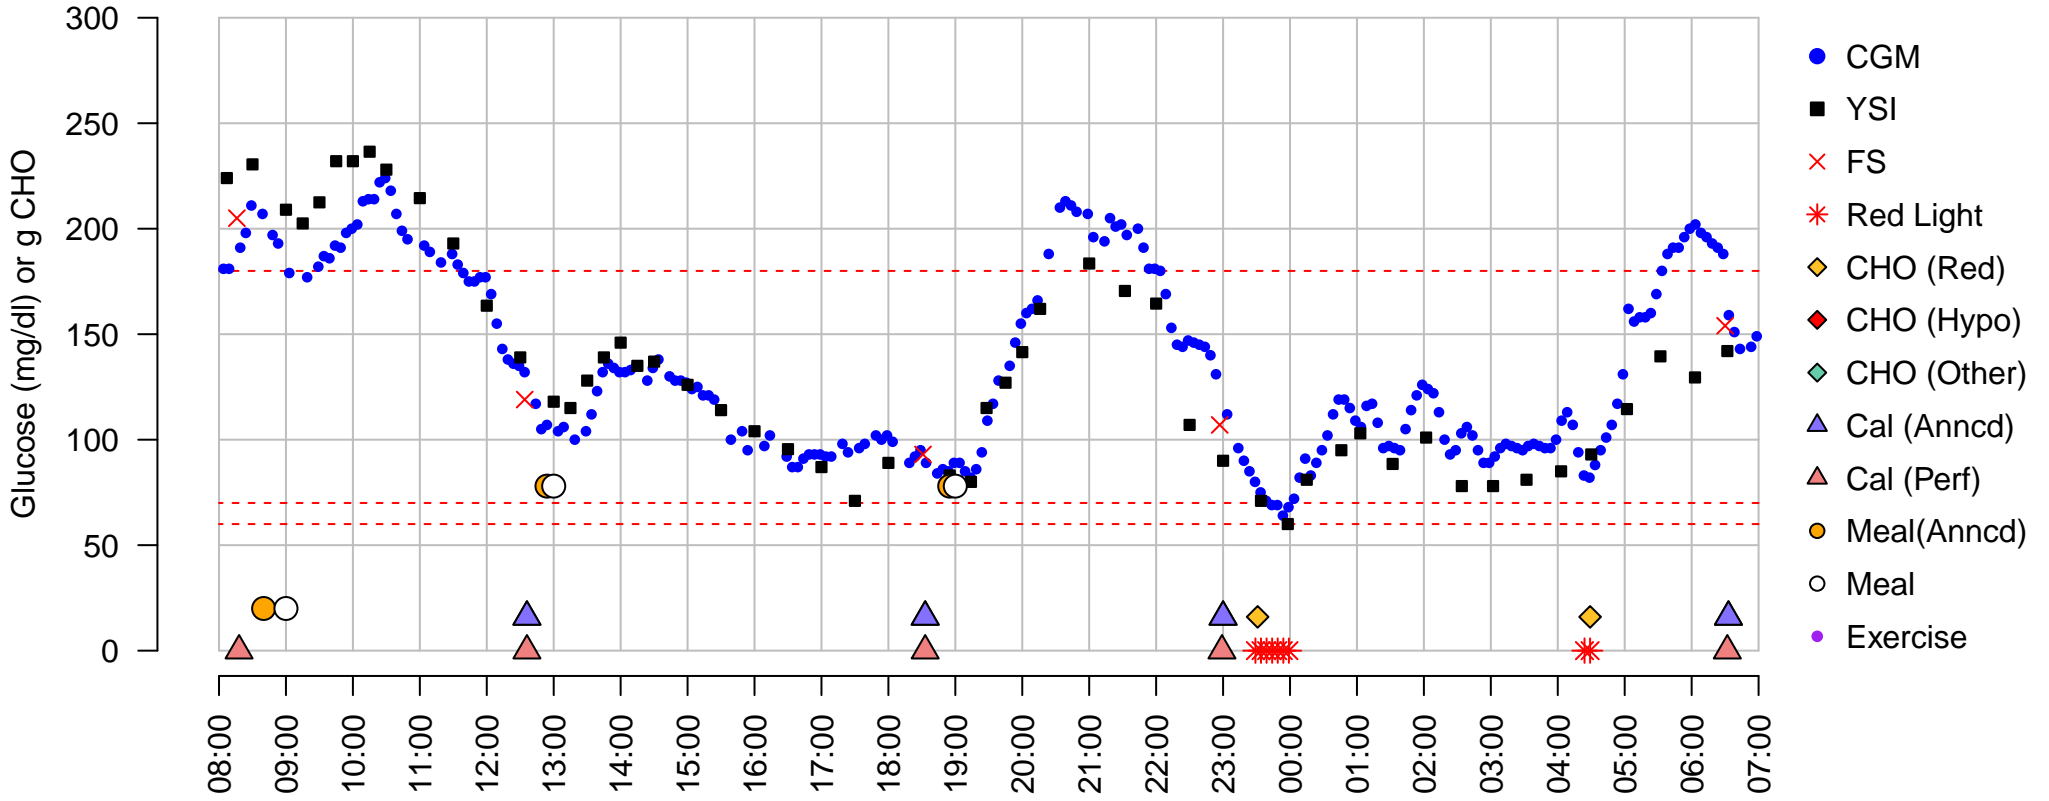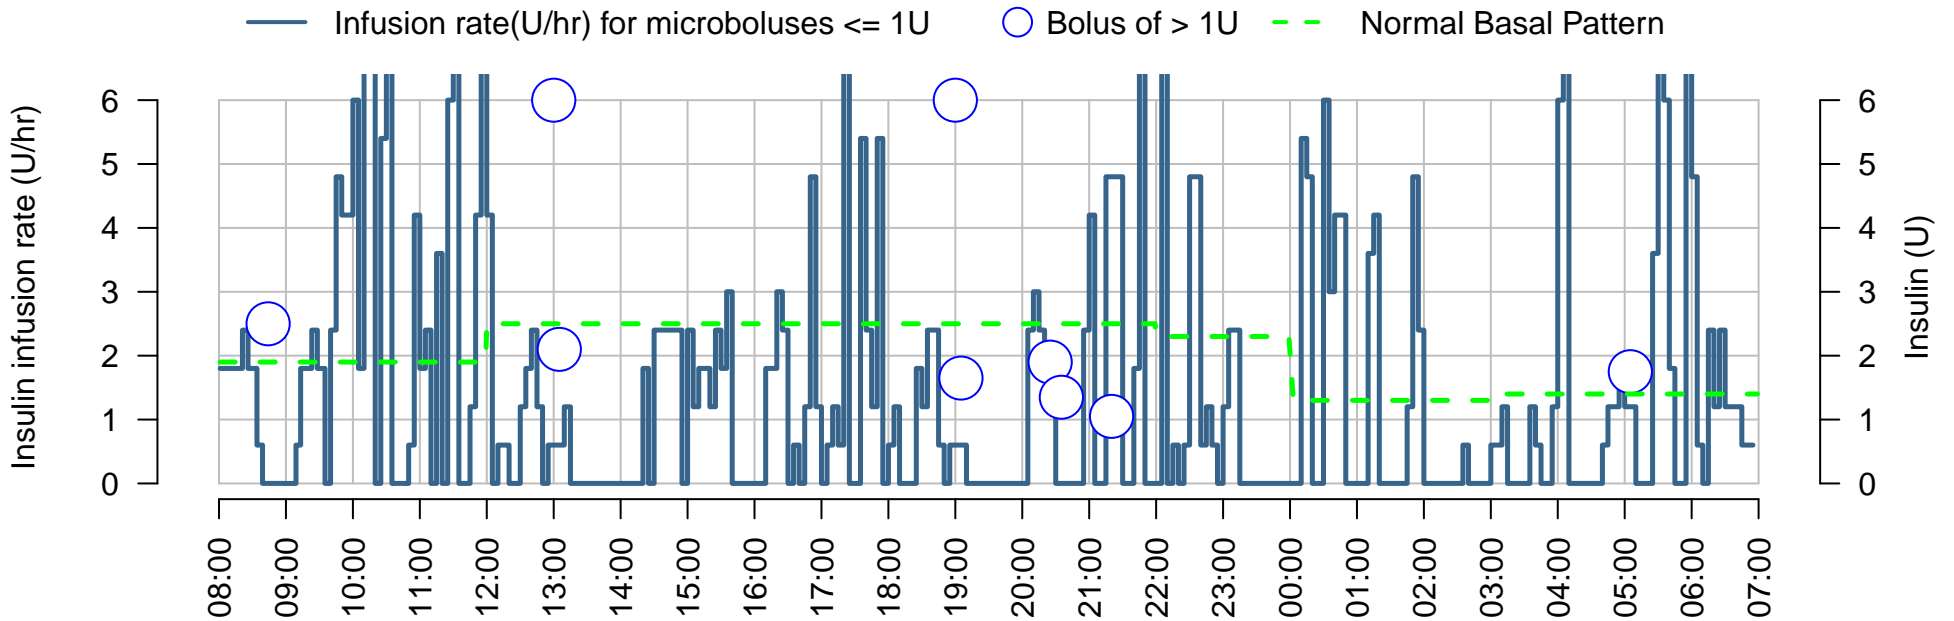



# Subject 40

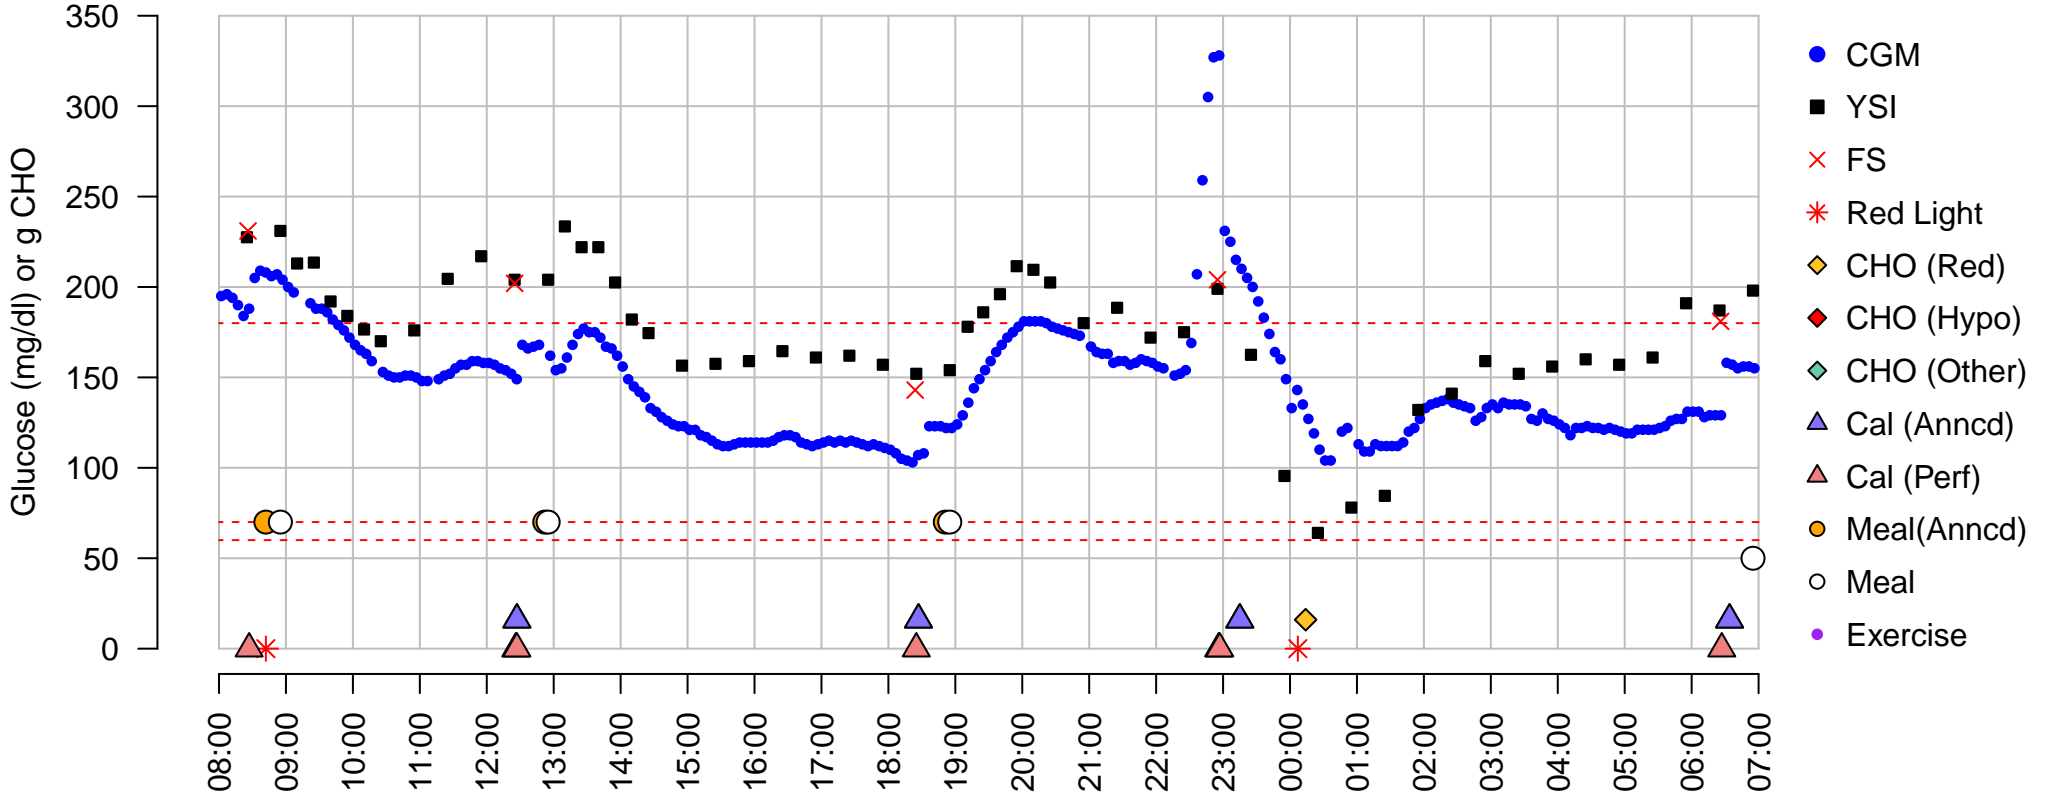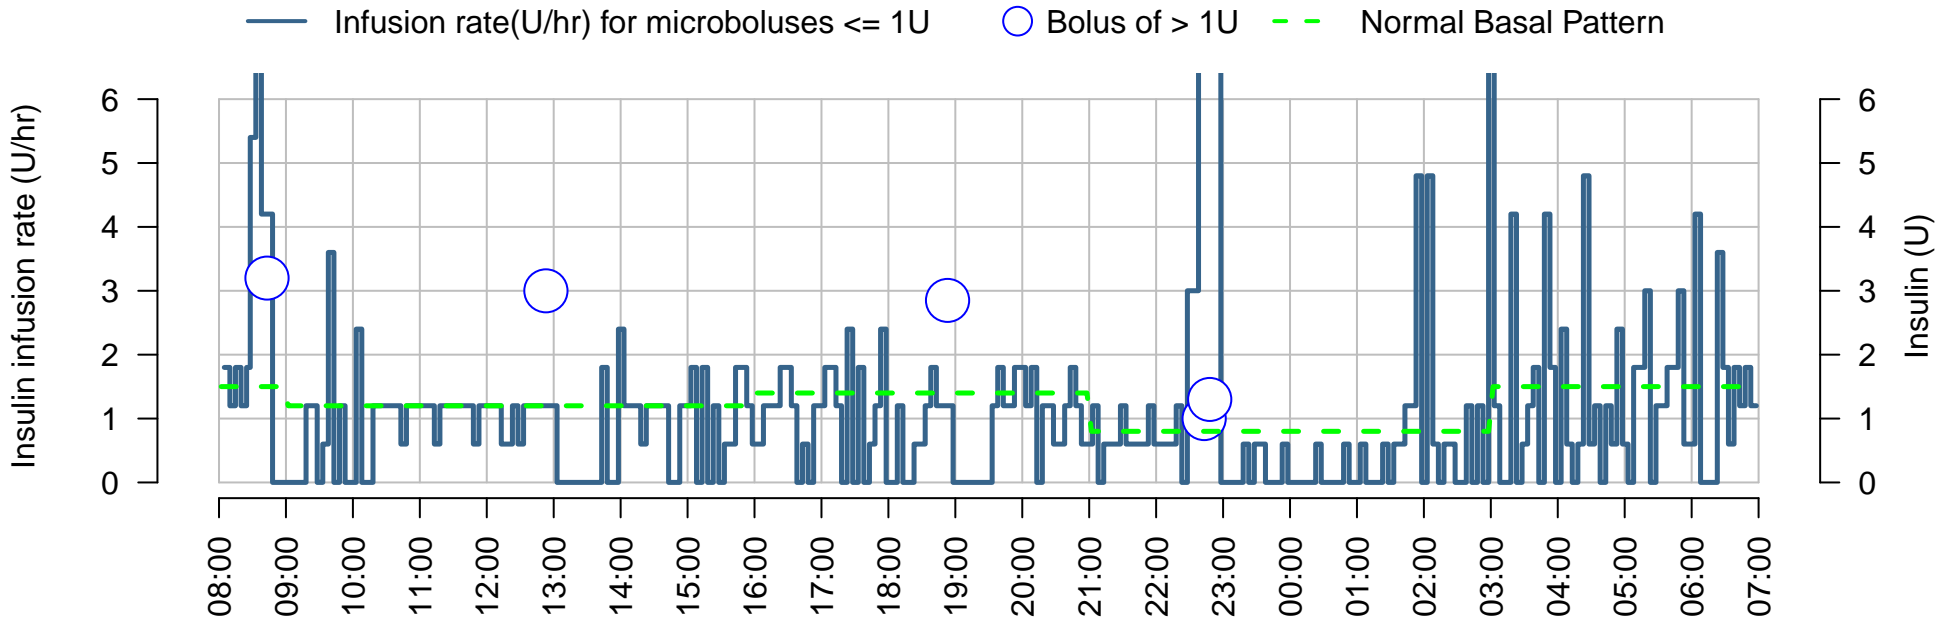

# Subject 41

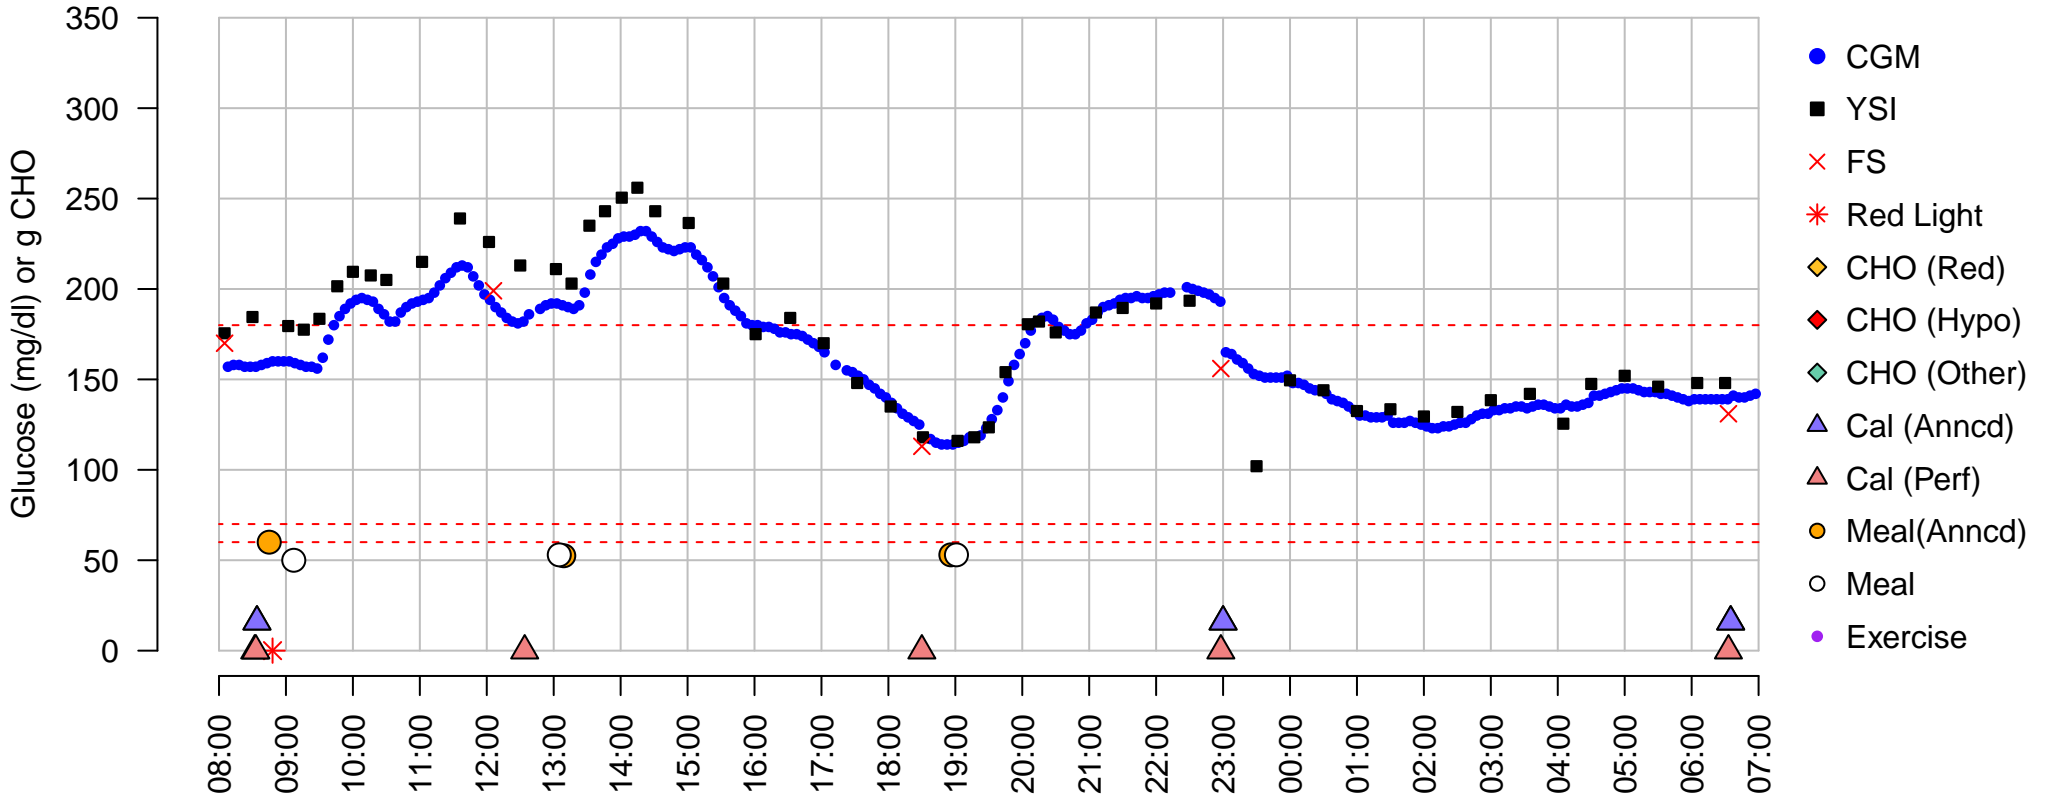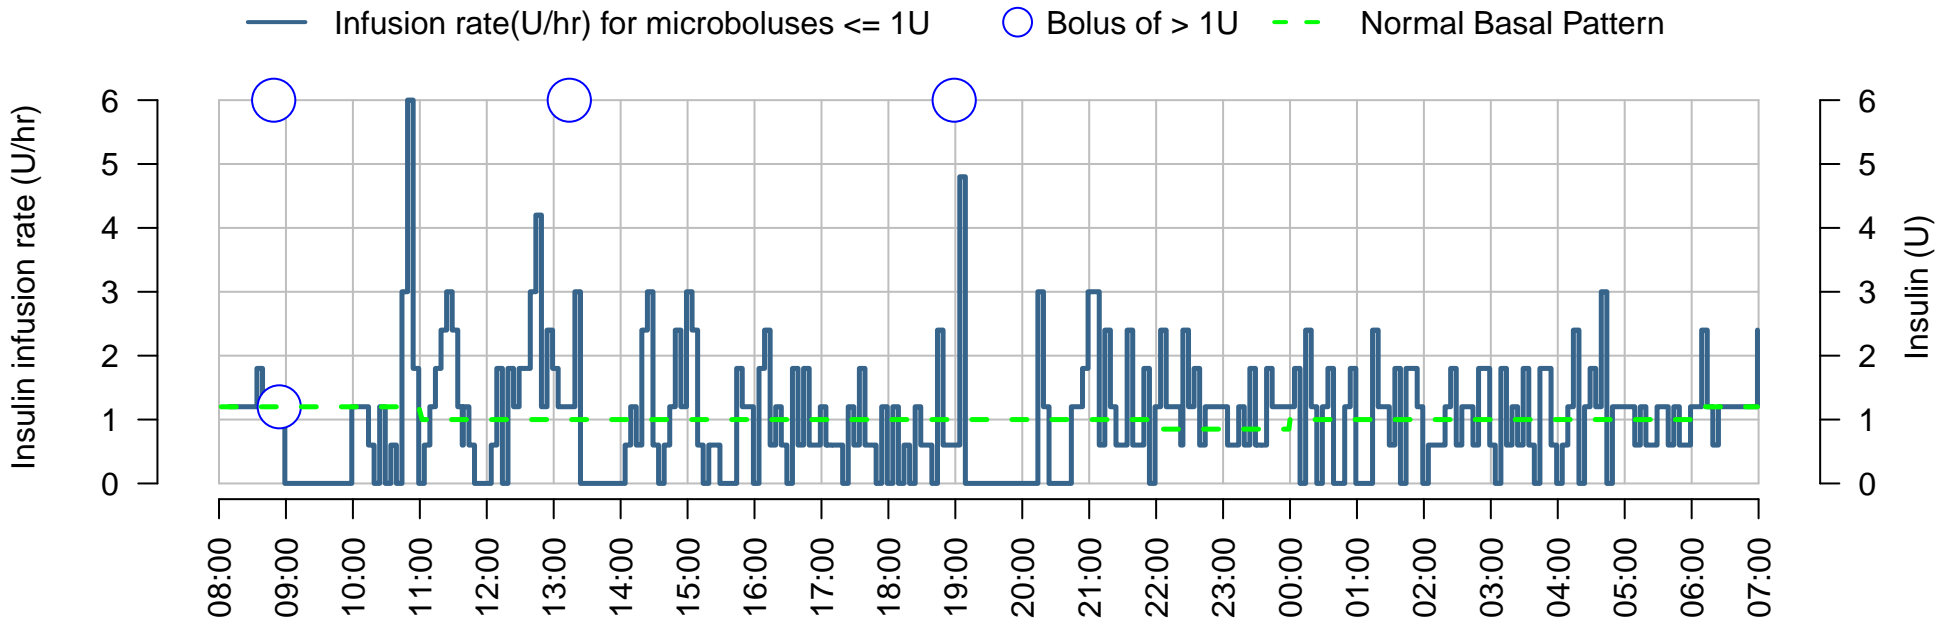

# Subject 42

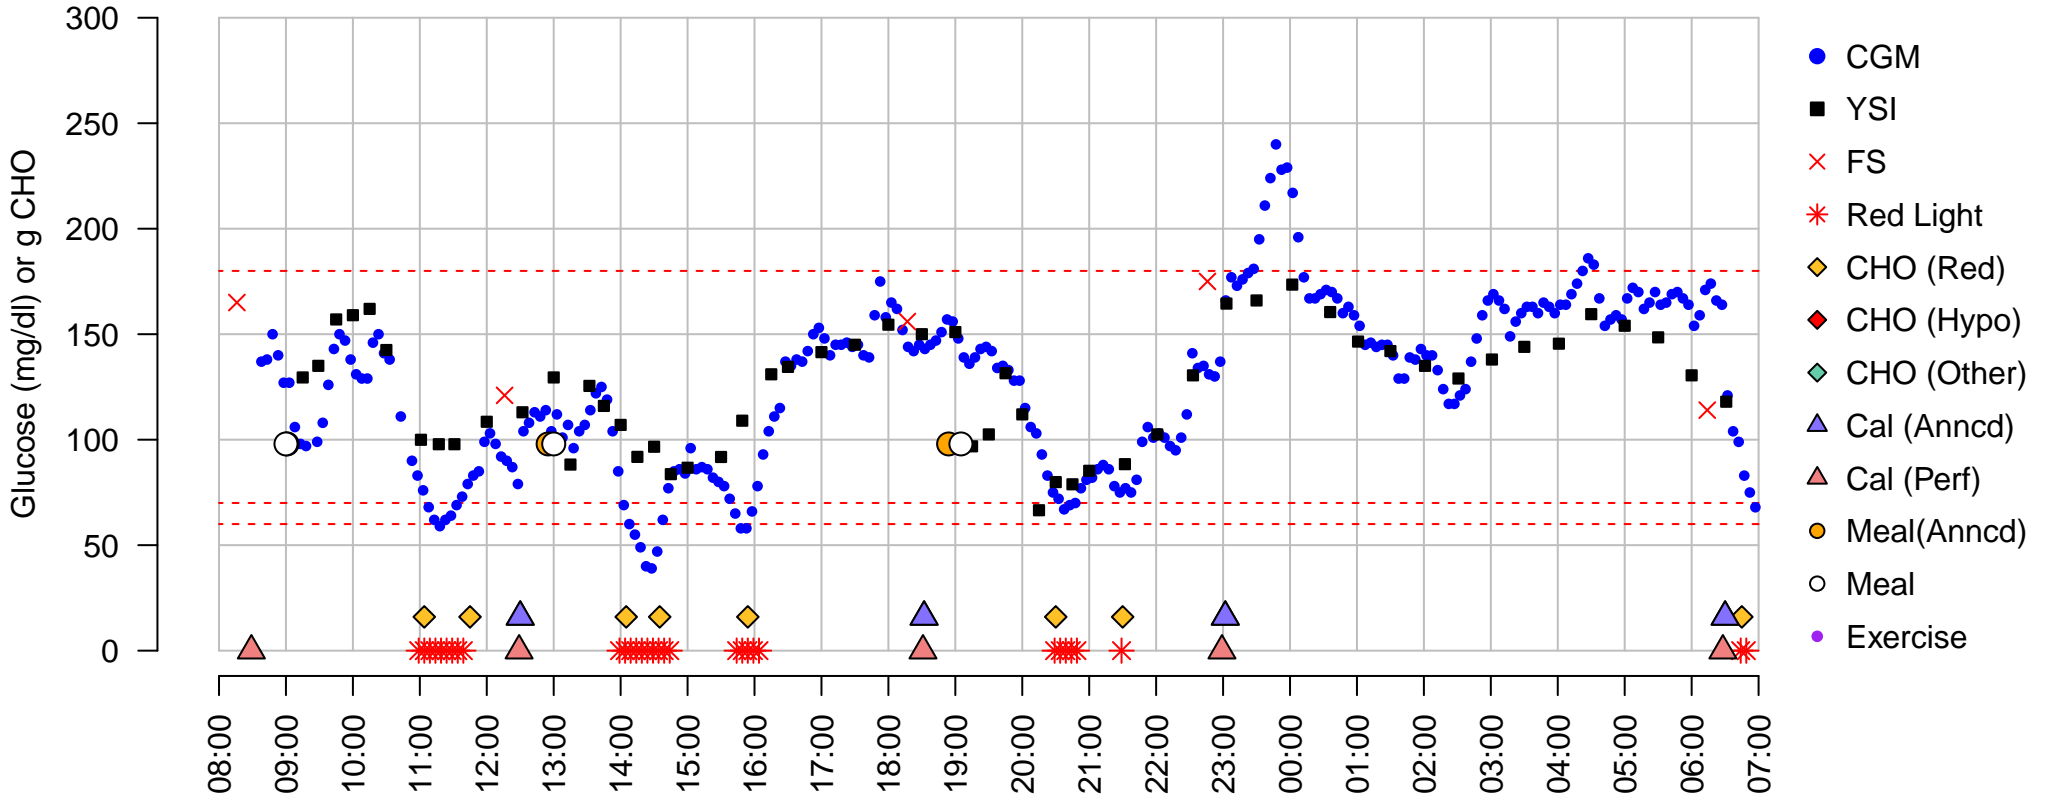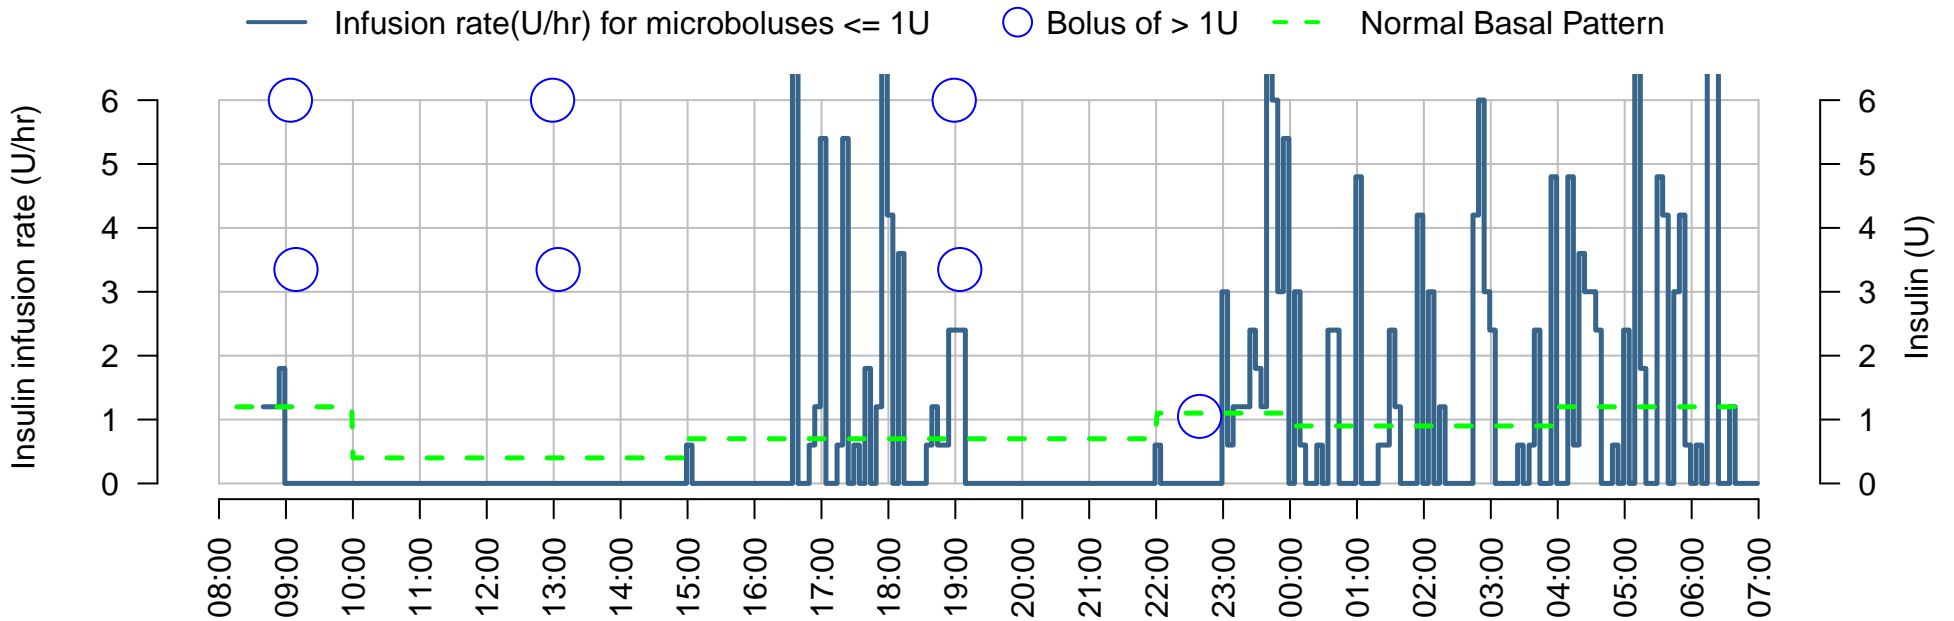

# Subject 43

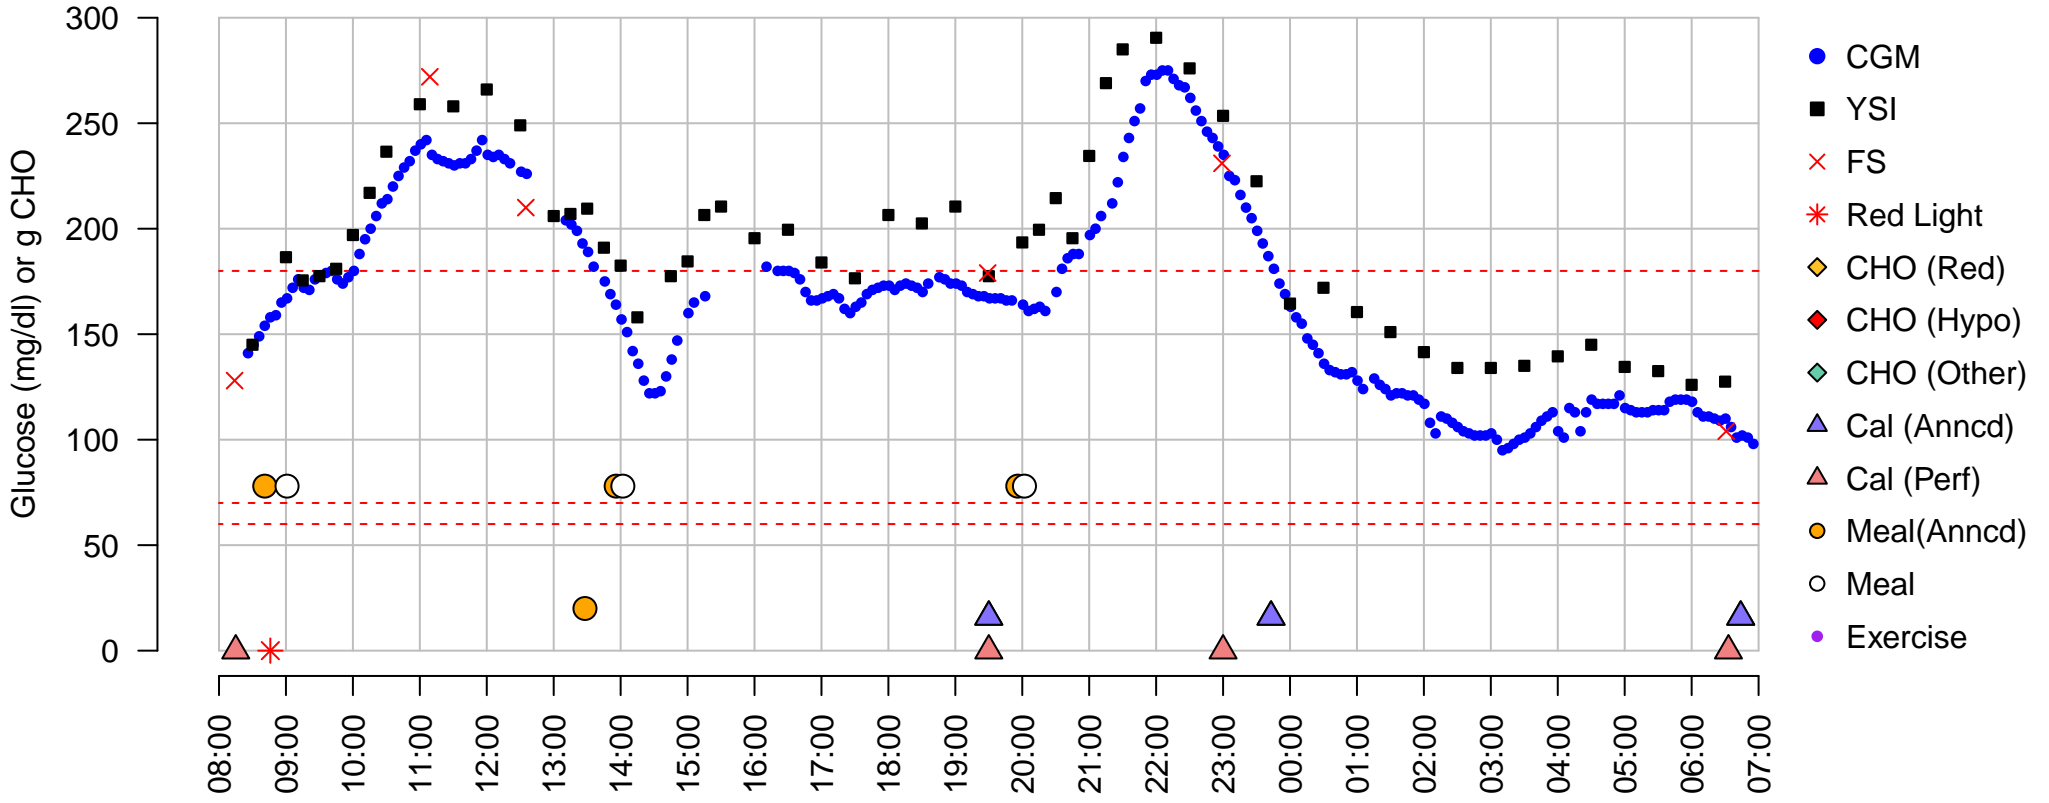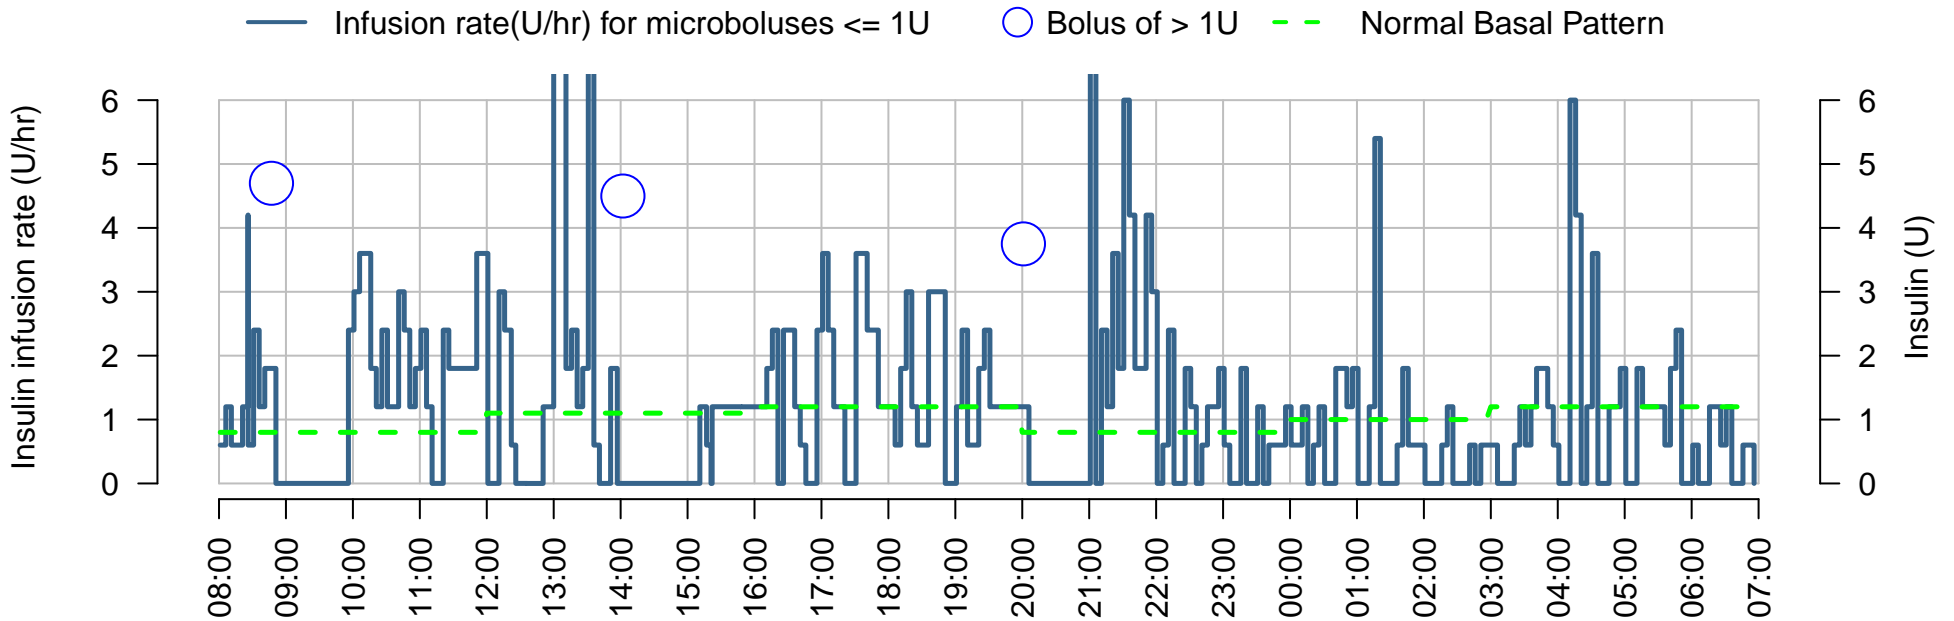

# Subject 44

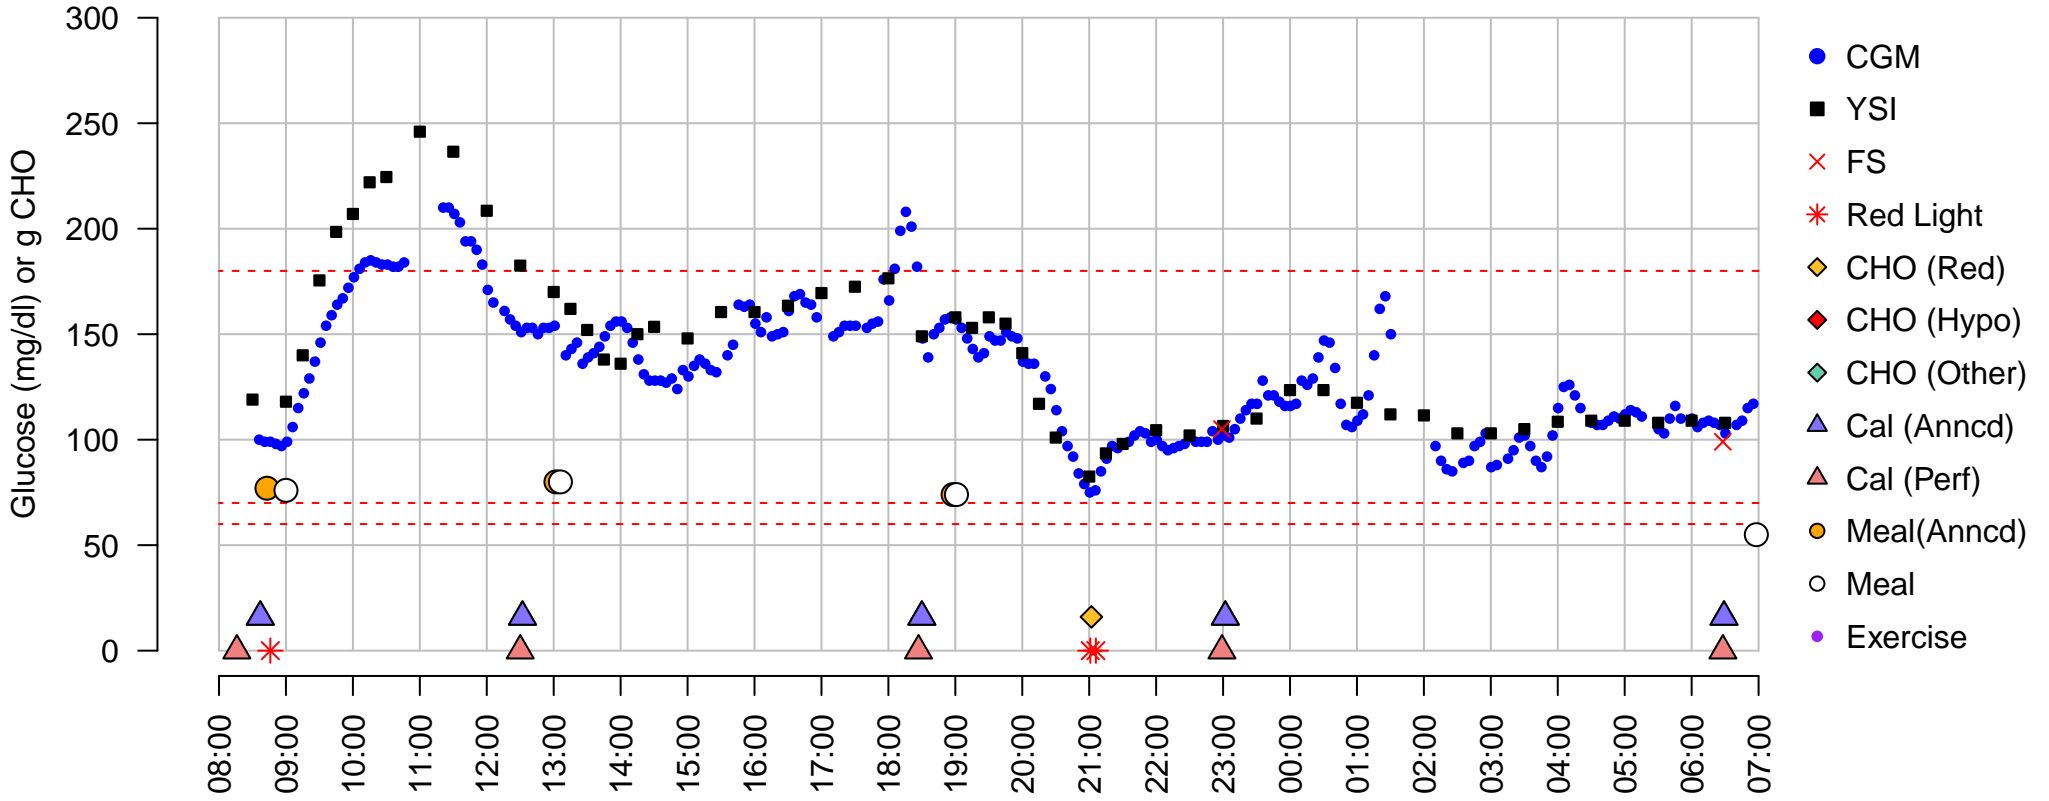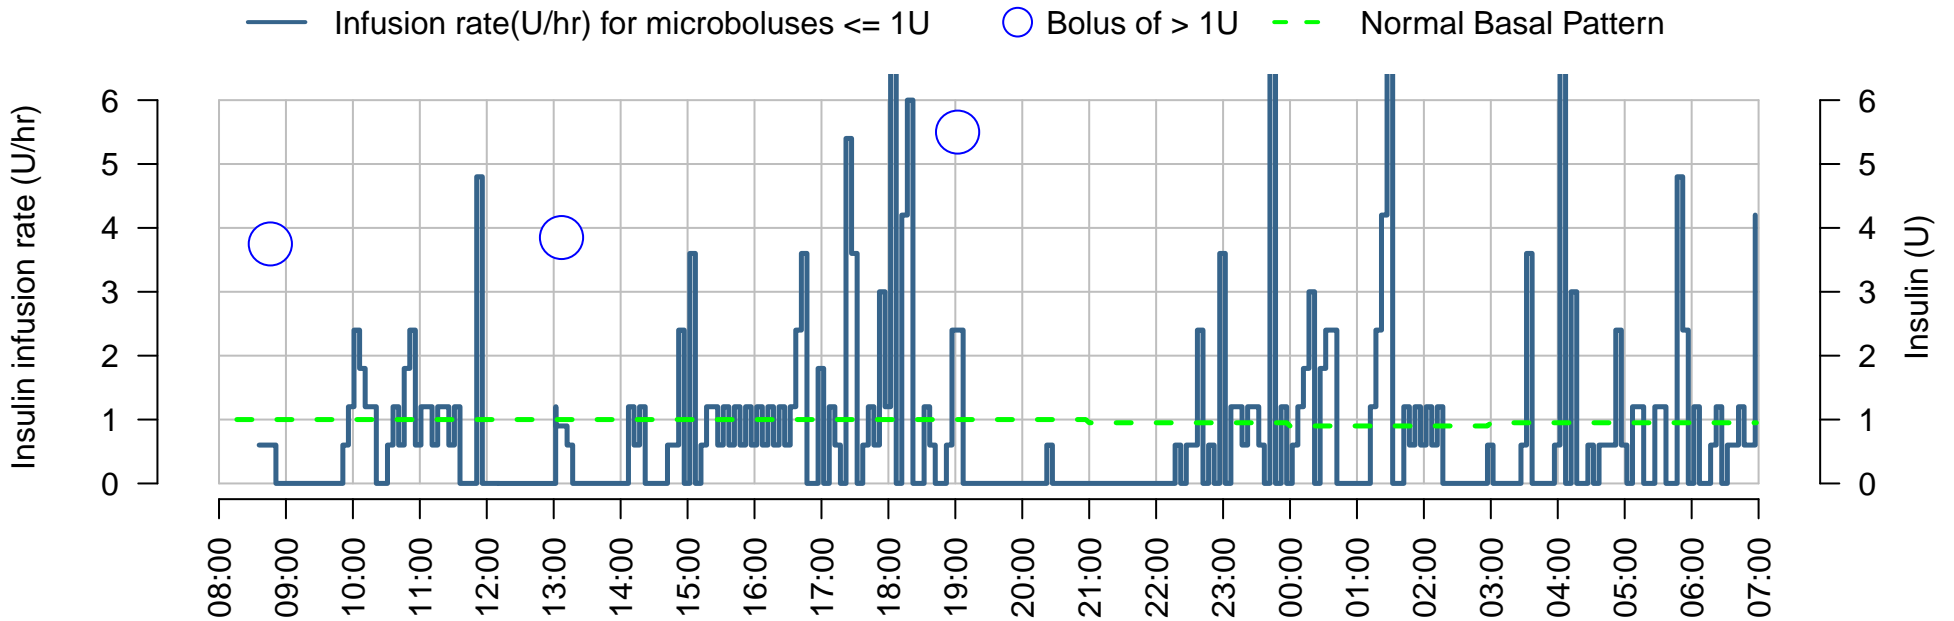

# Subject 45

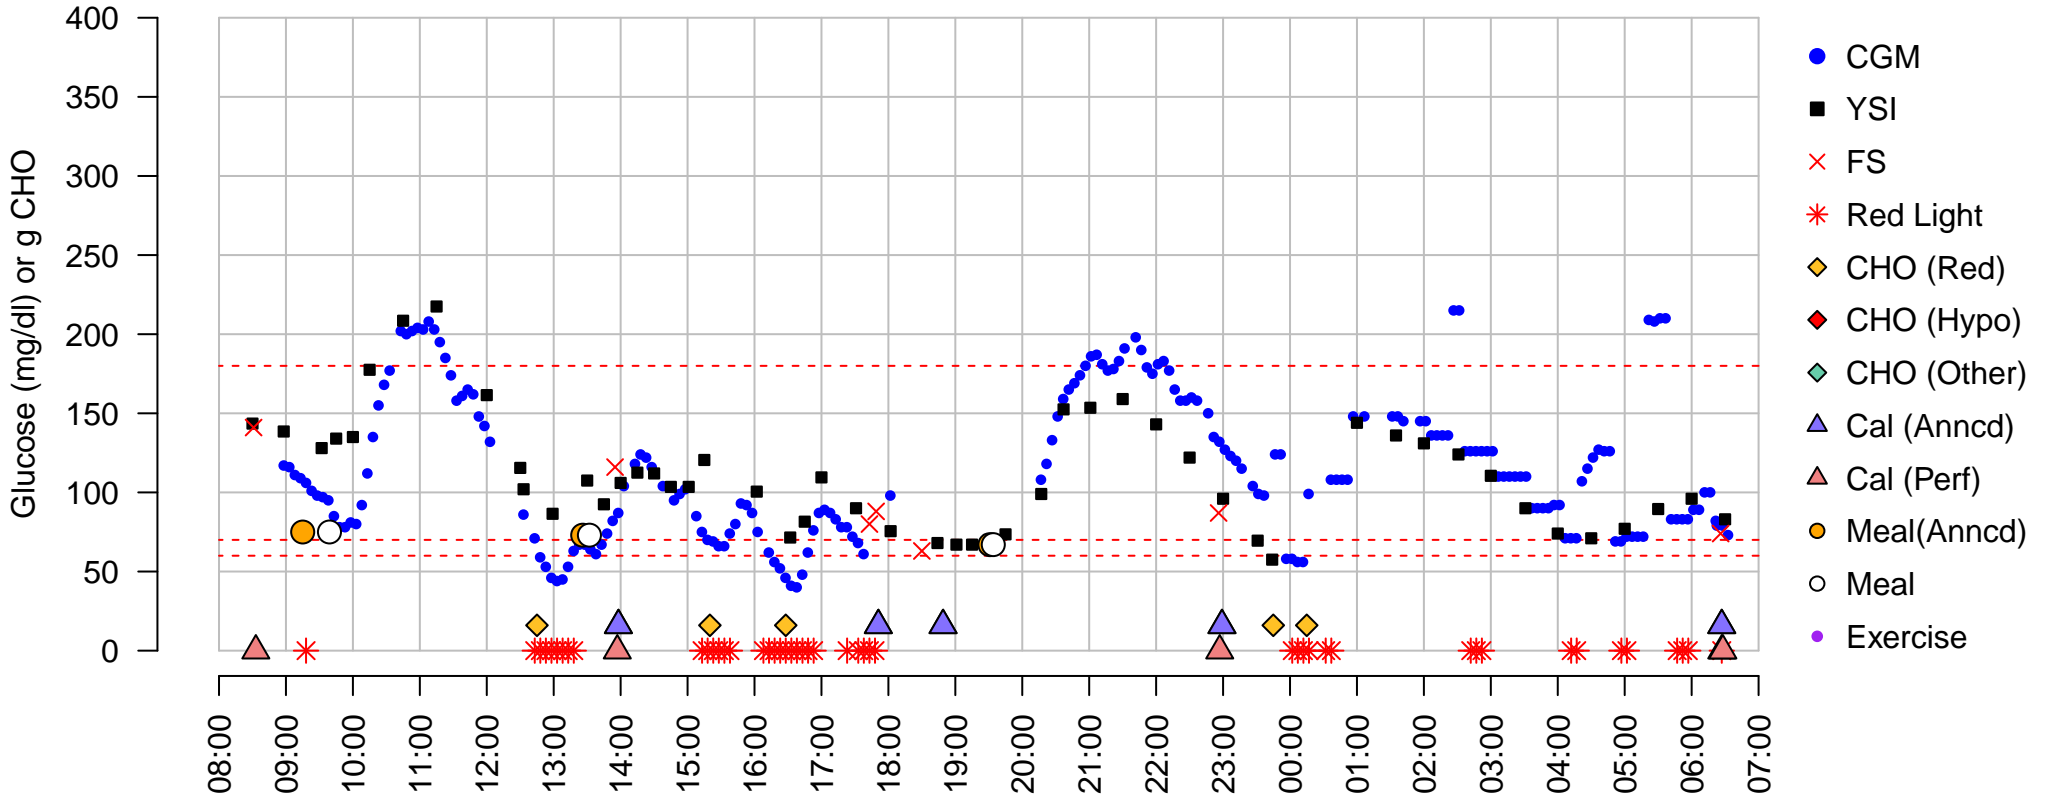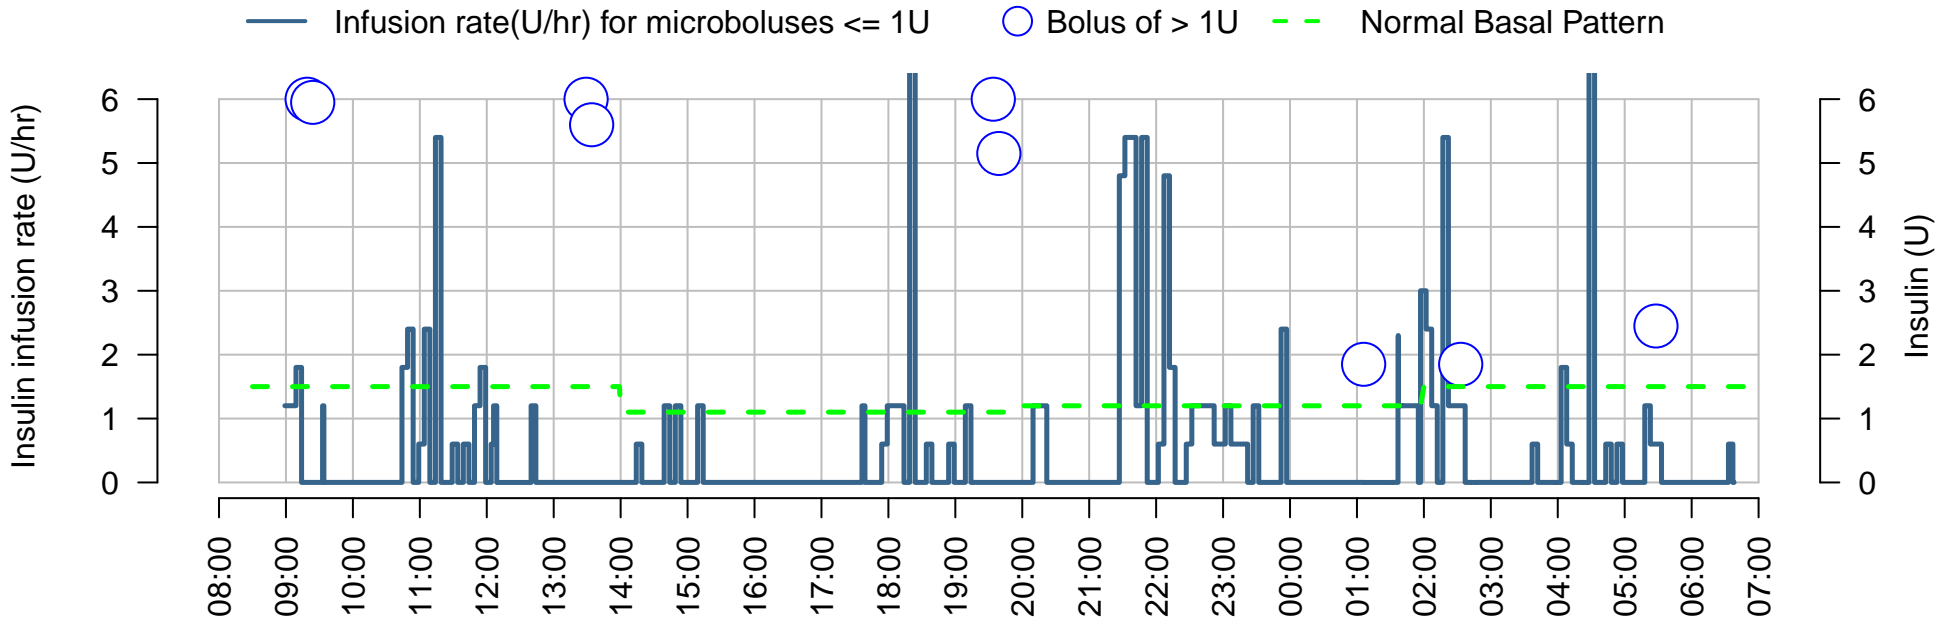

# Subject 46

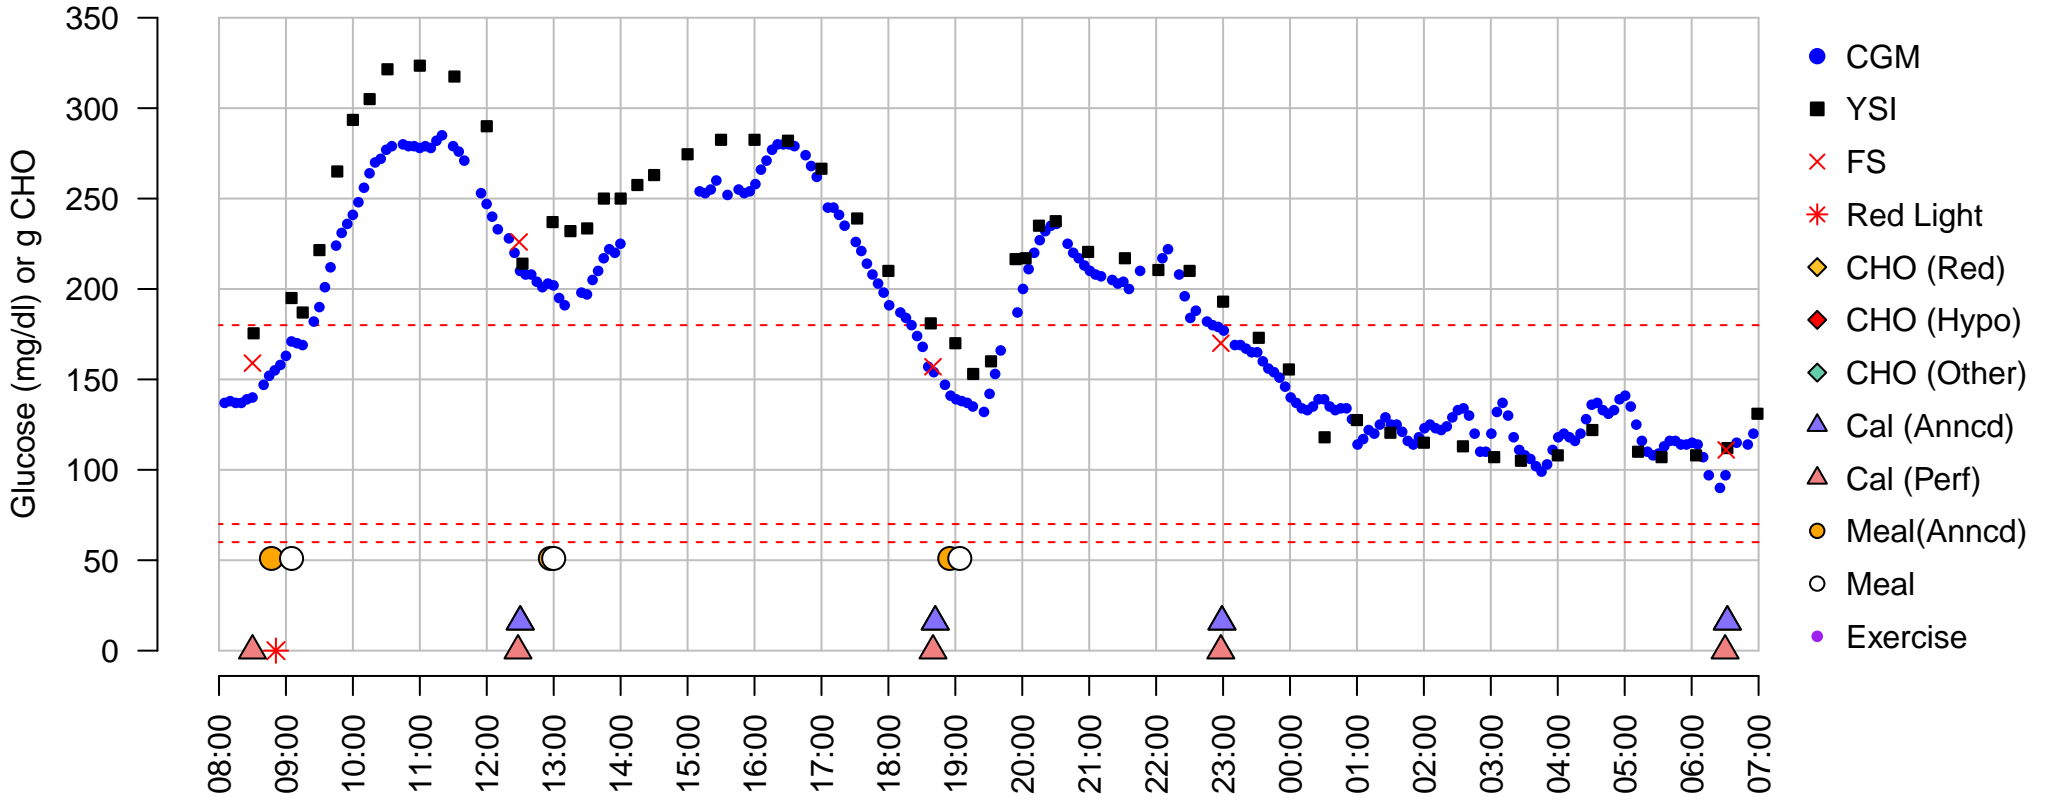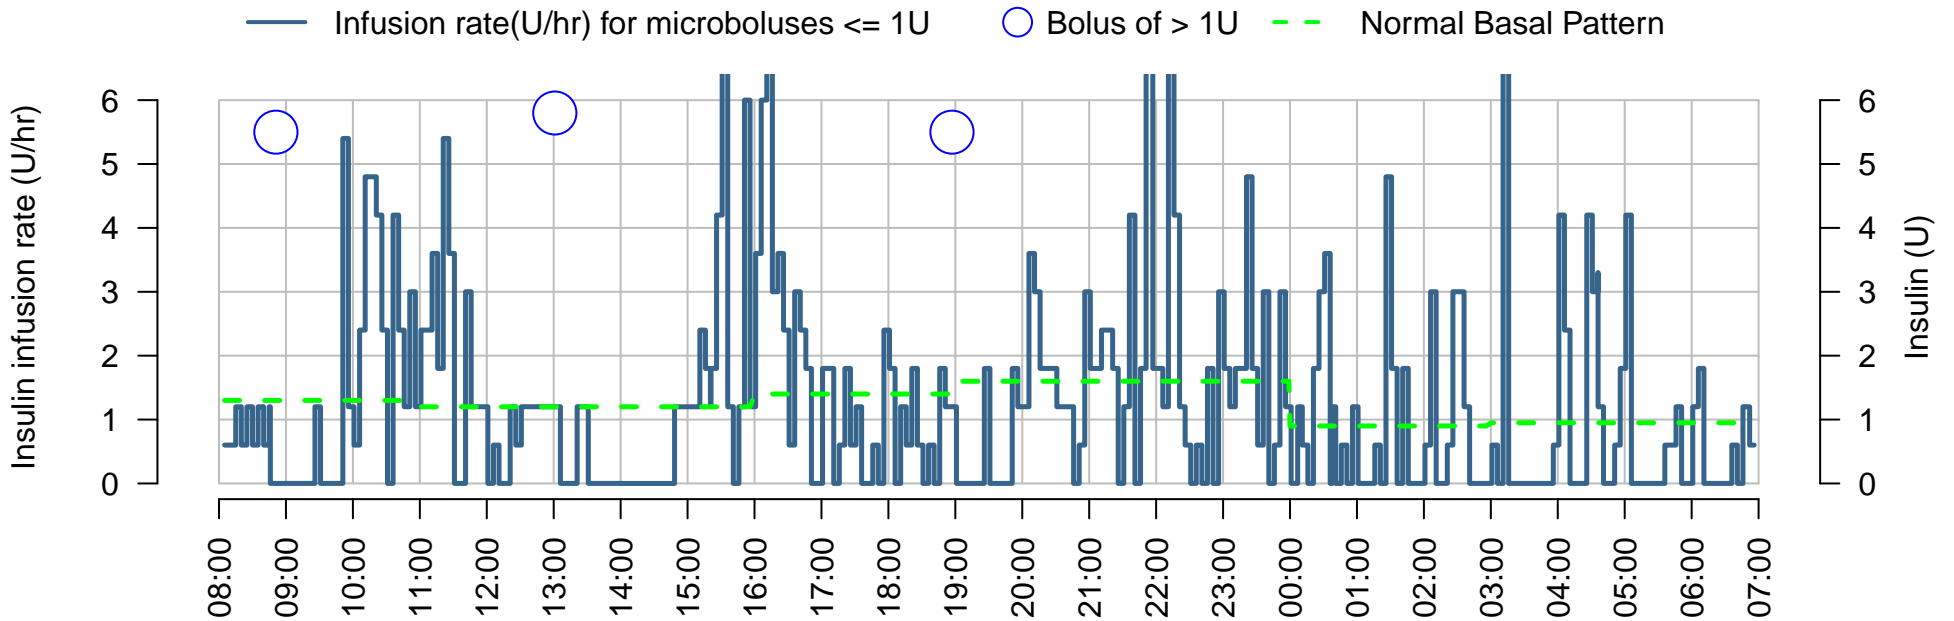

# Subject 47

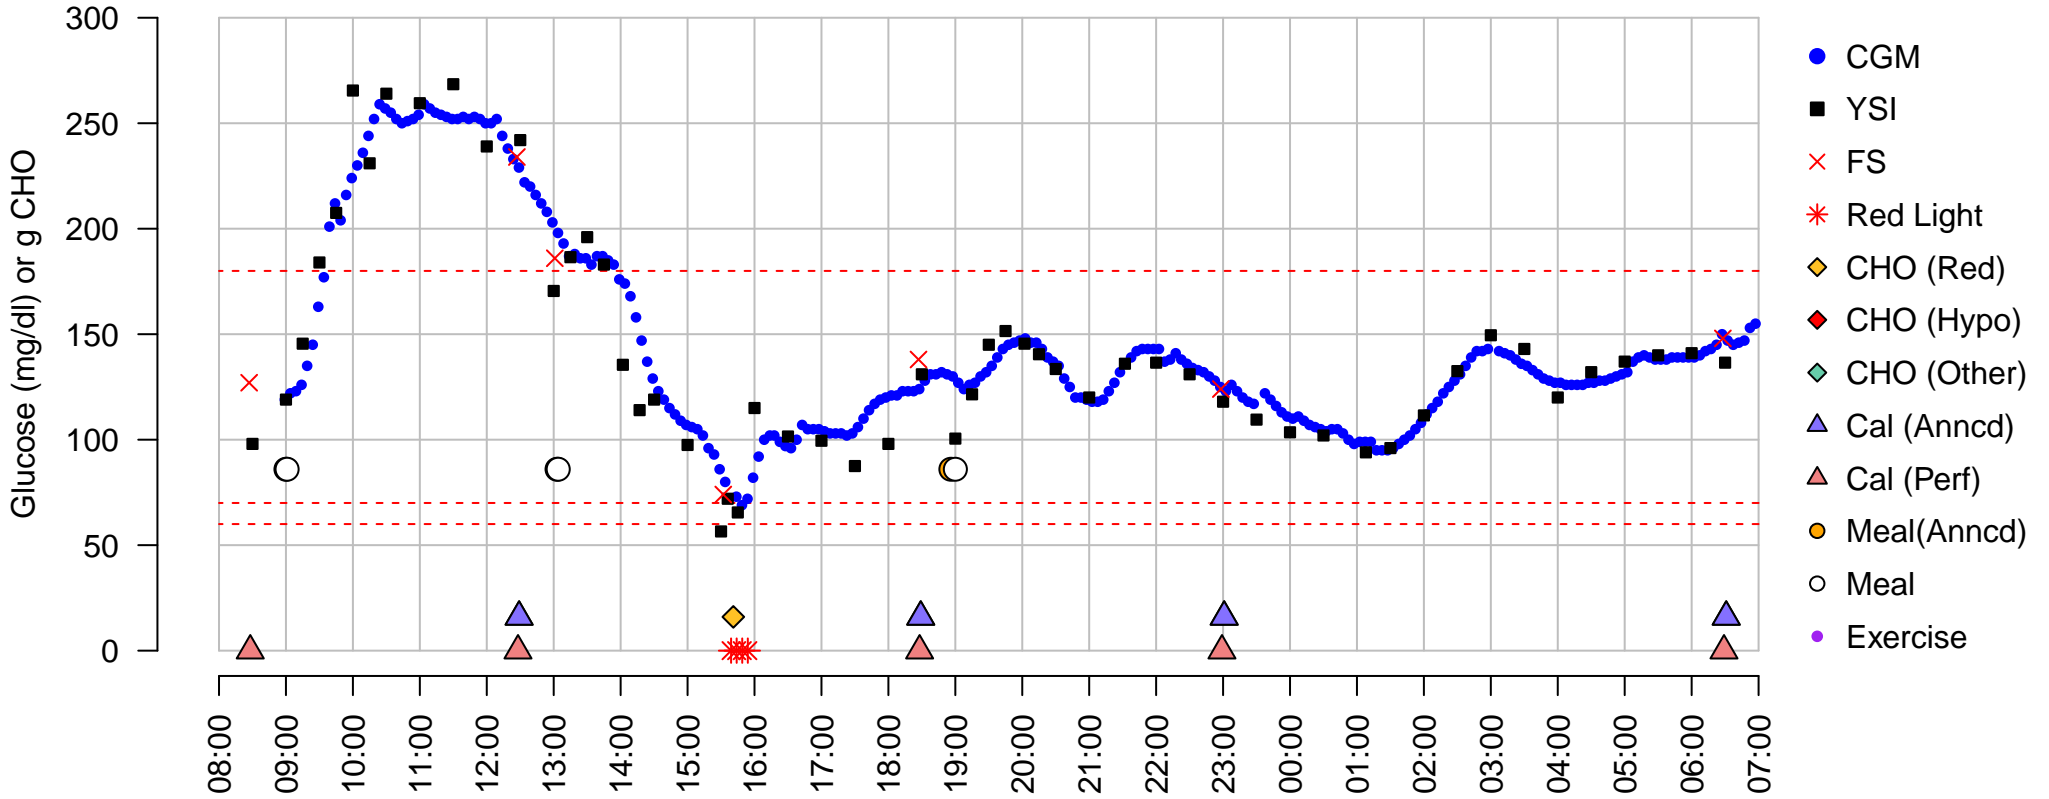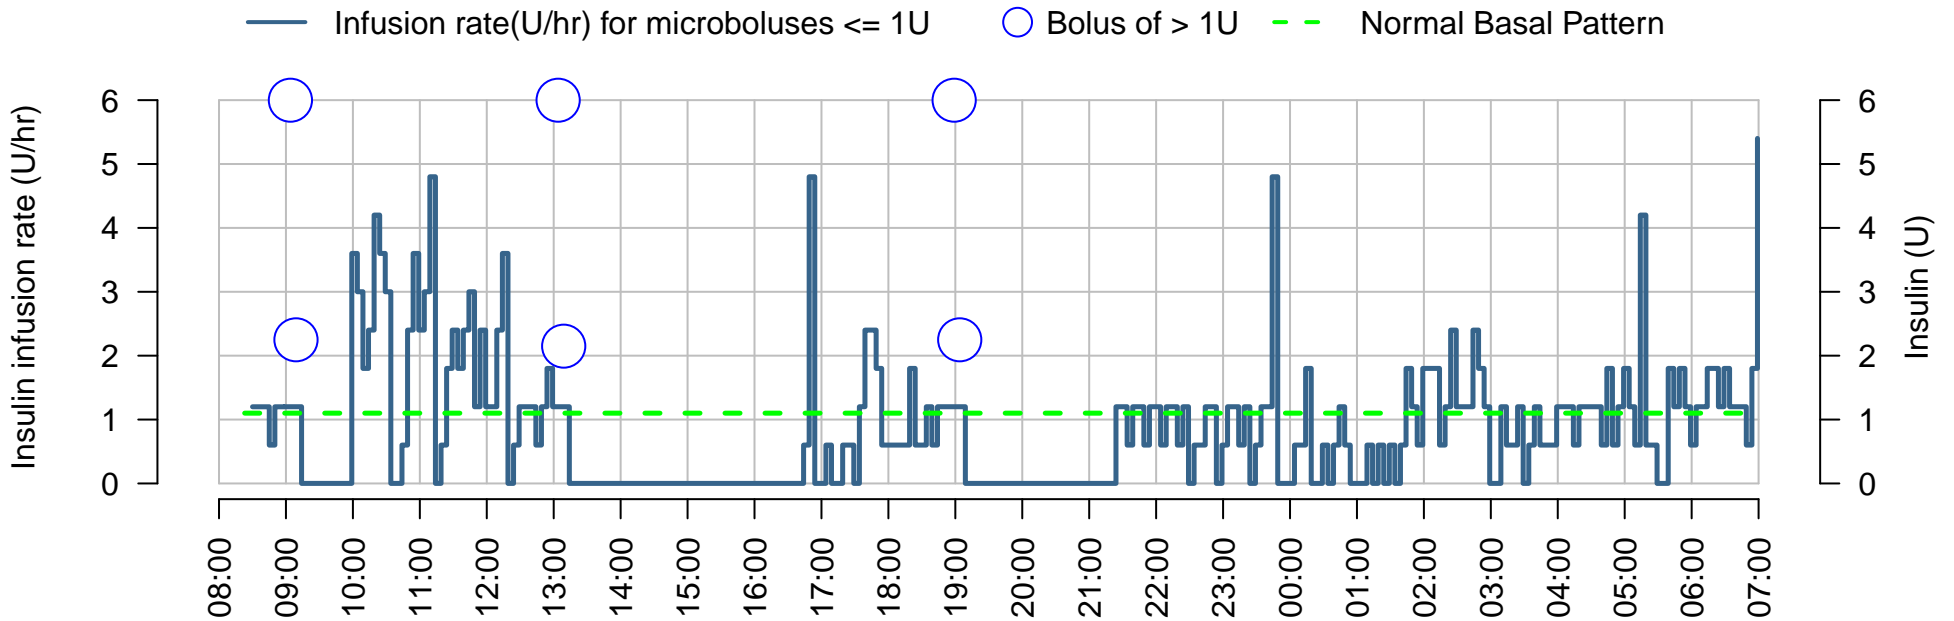



# Subject 48

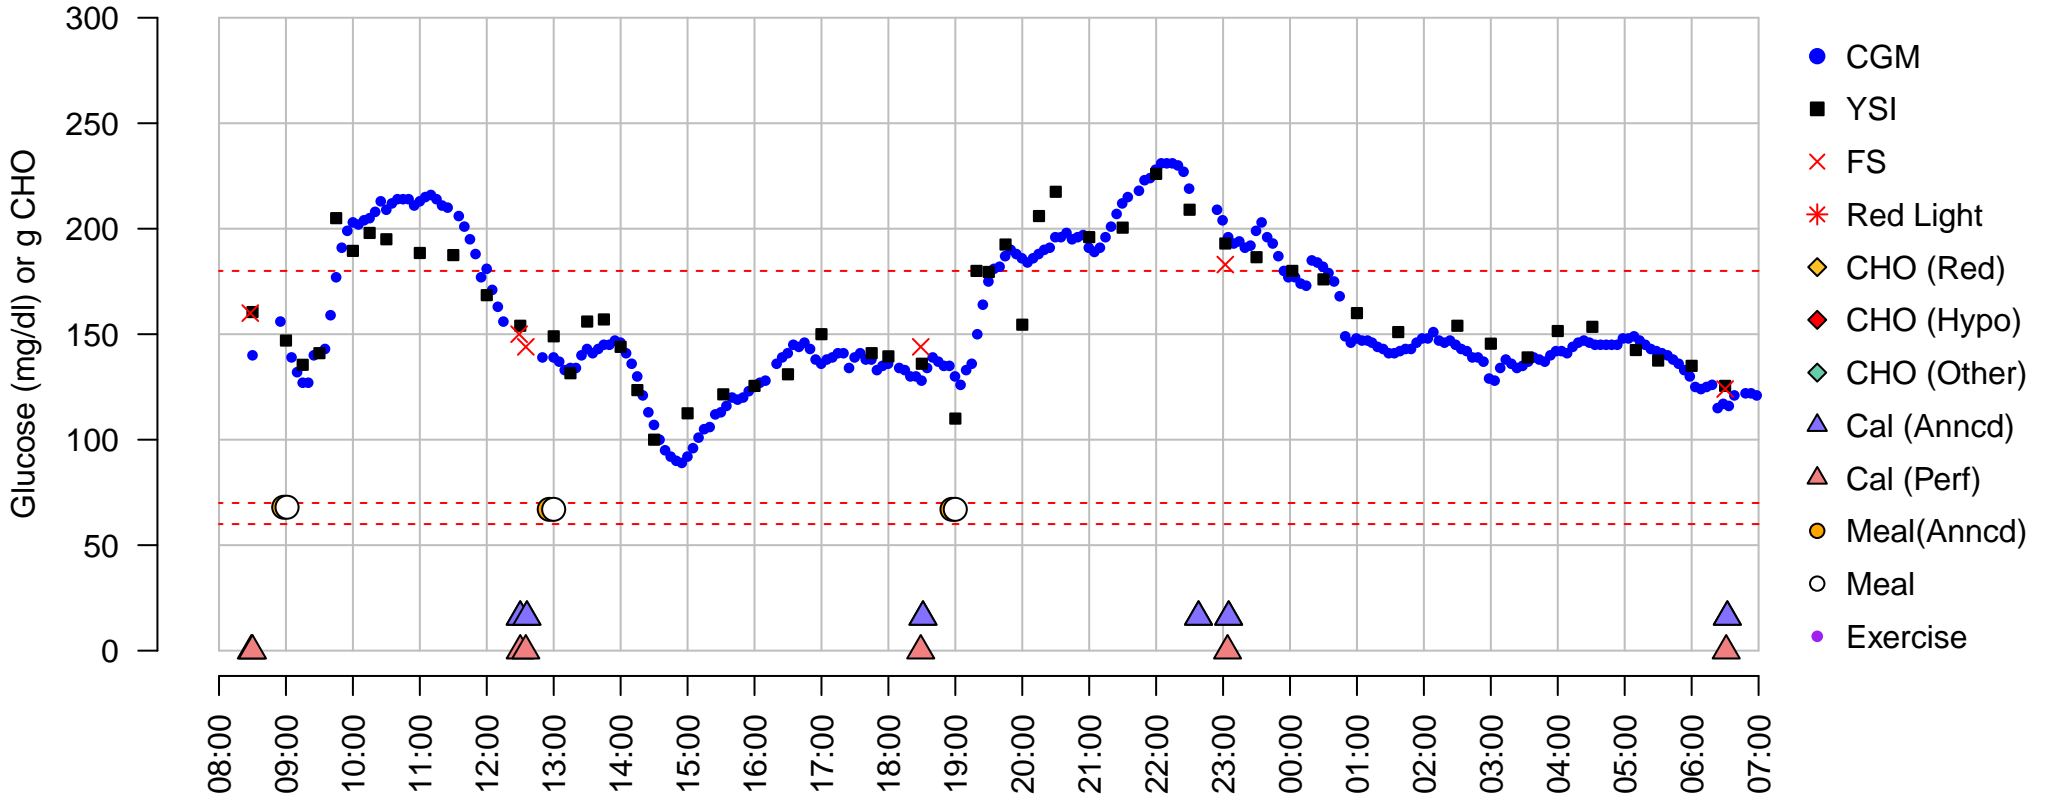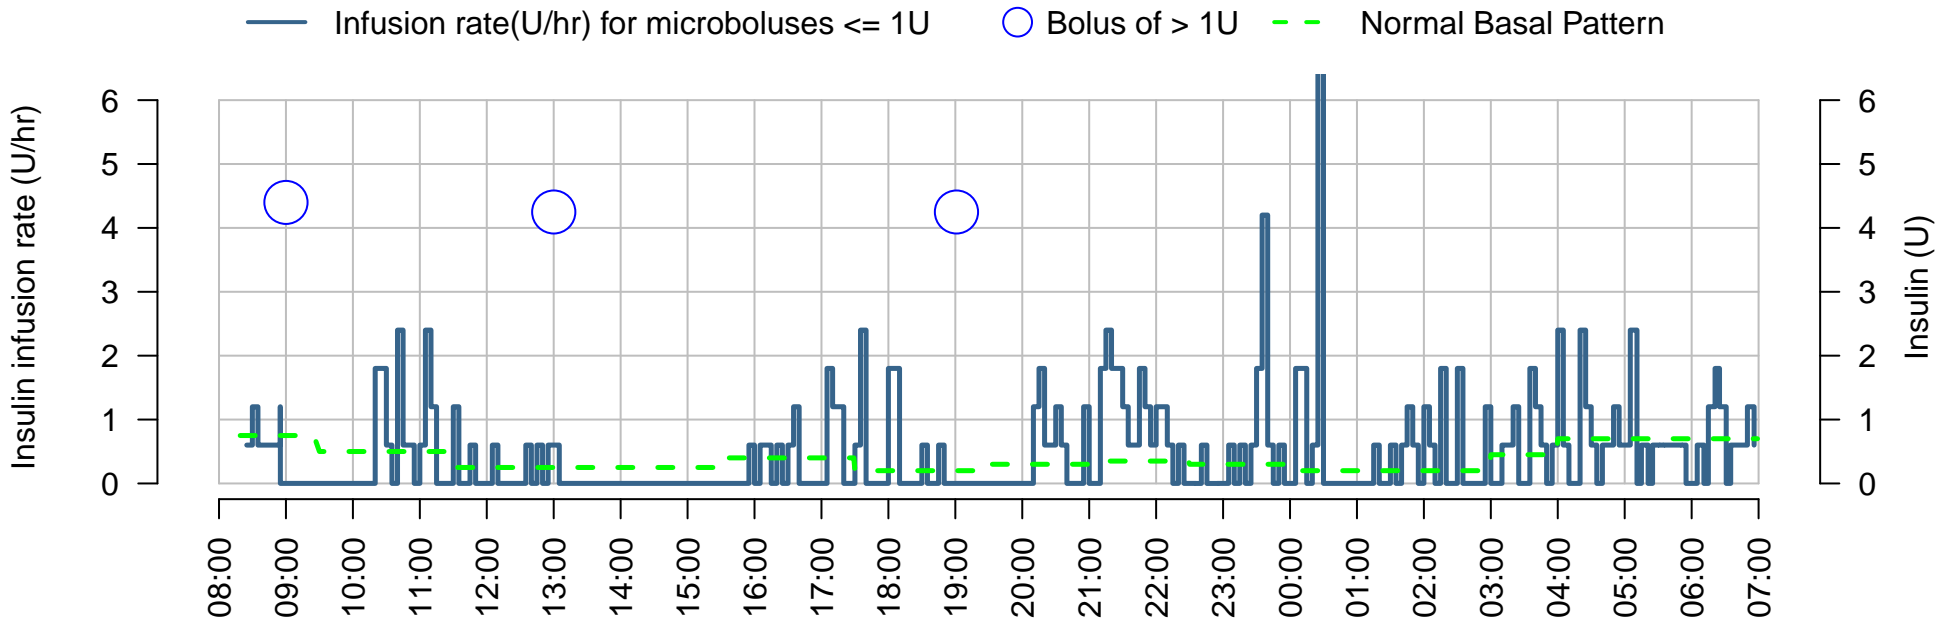

# Subject 49

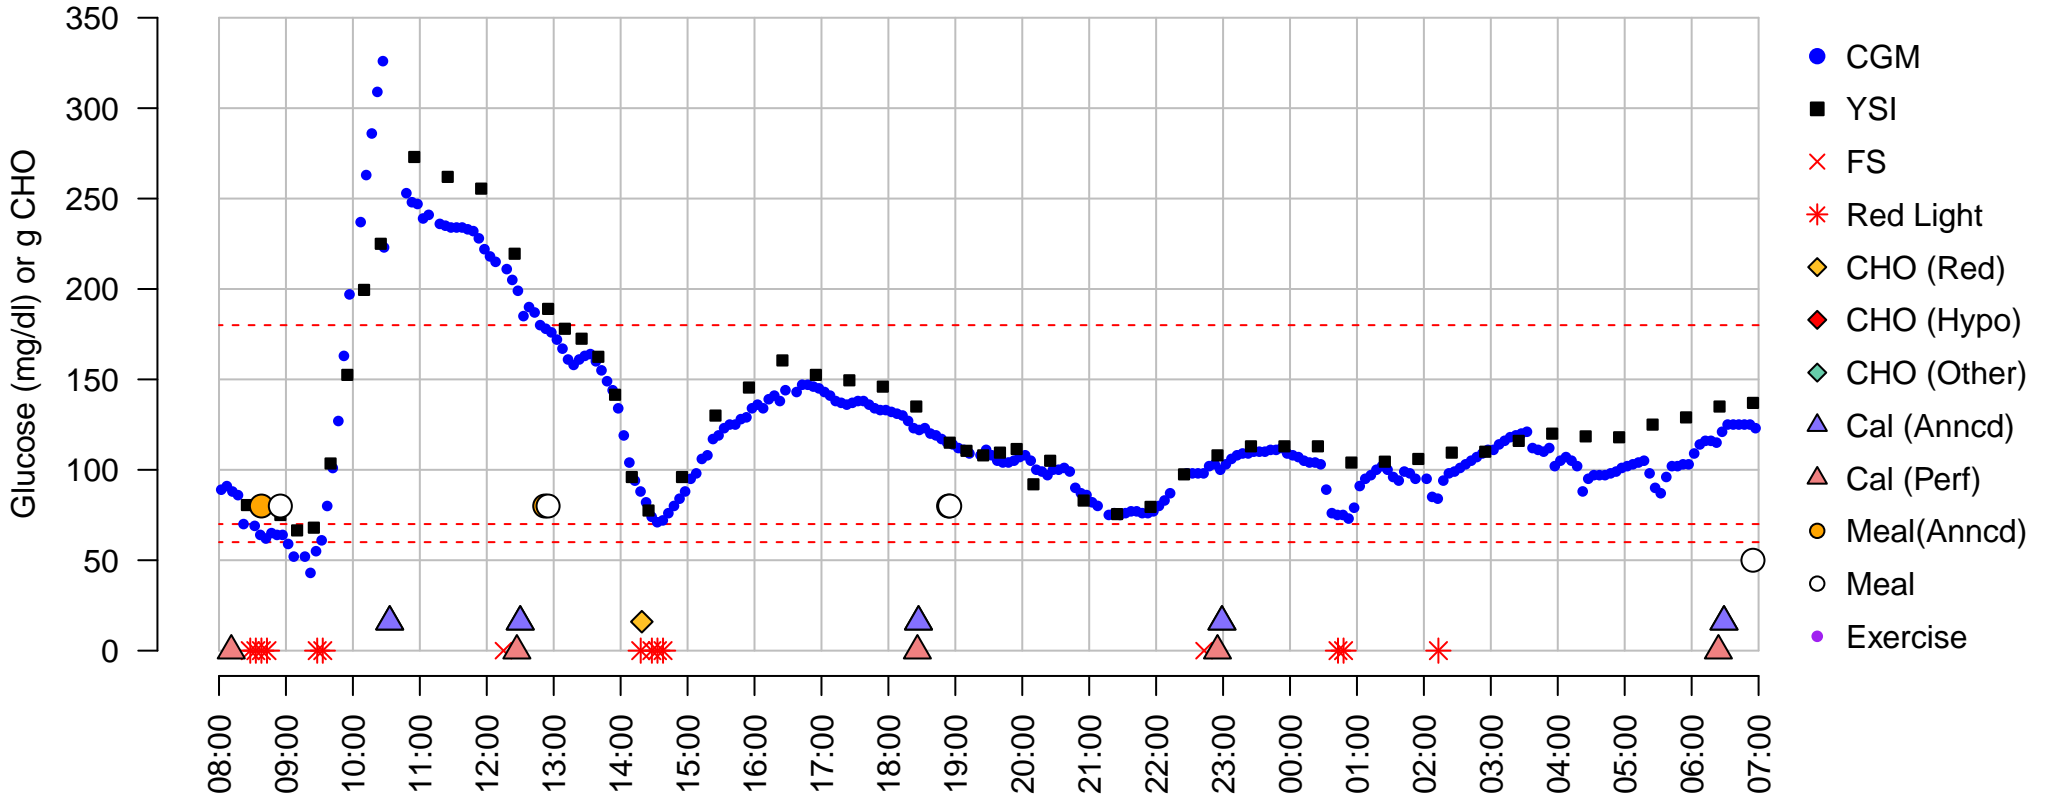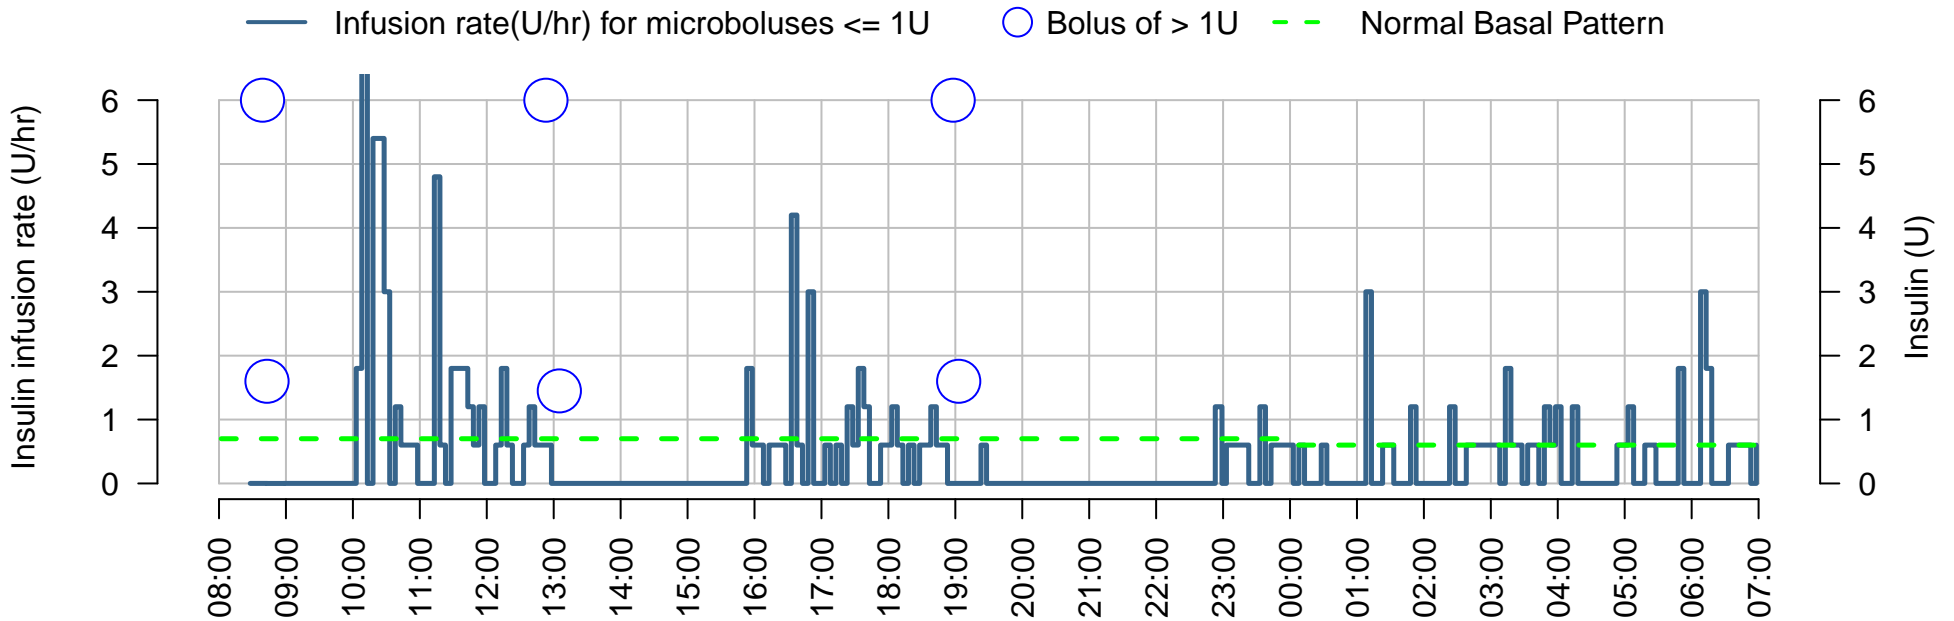

# Subject 50

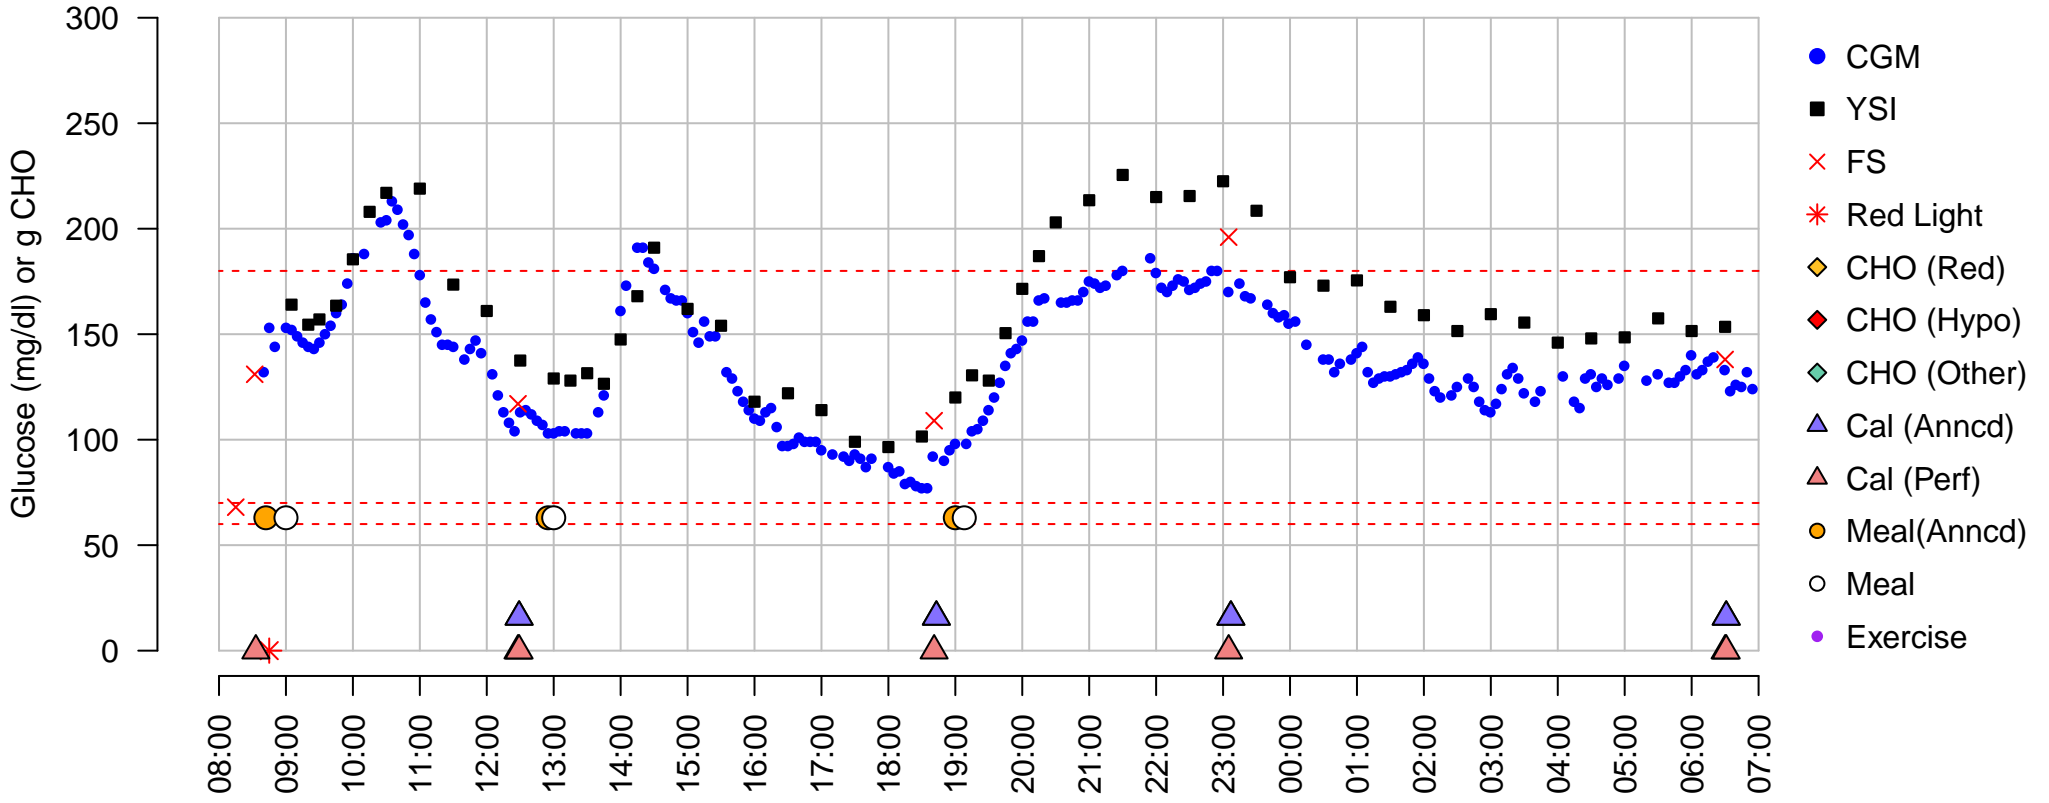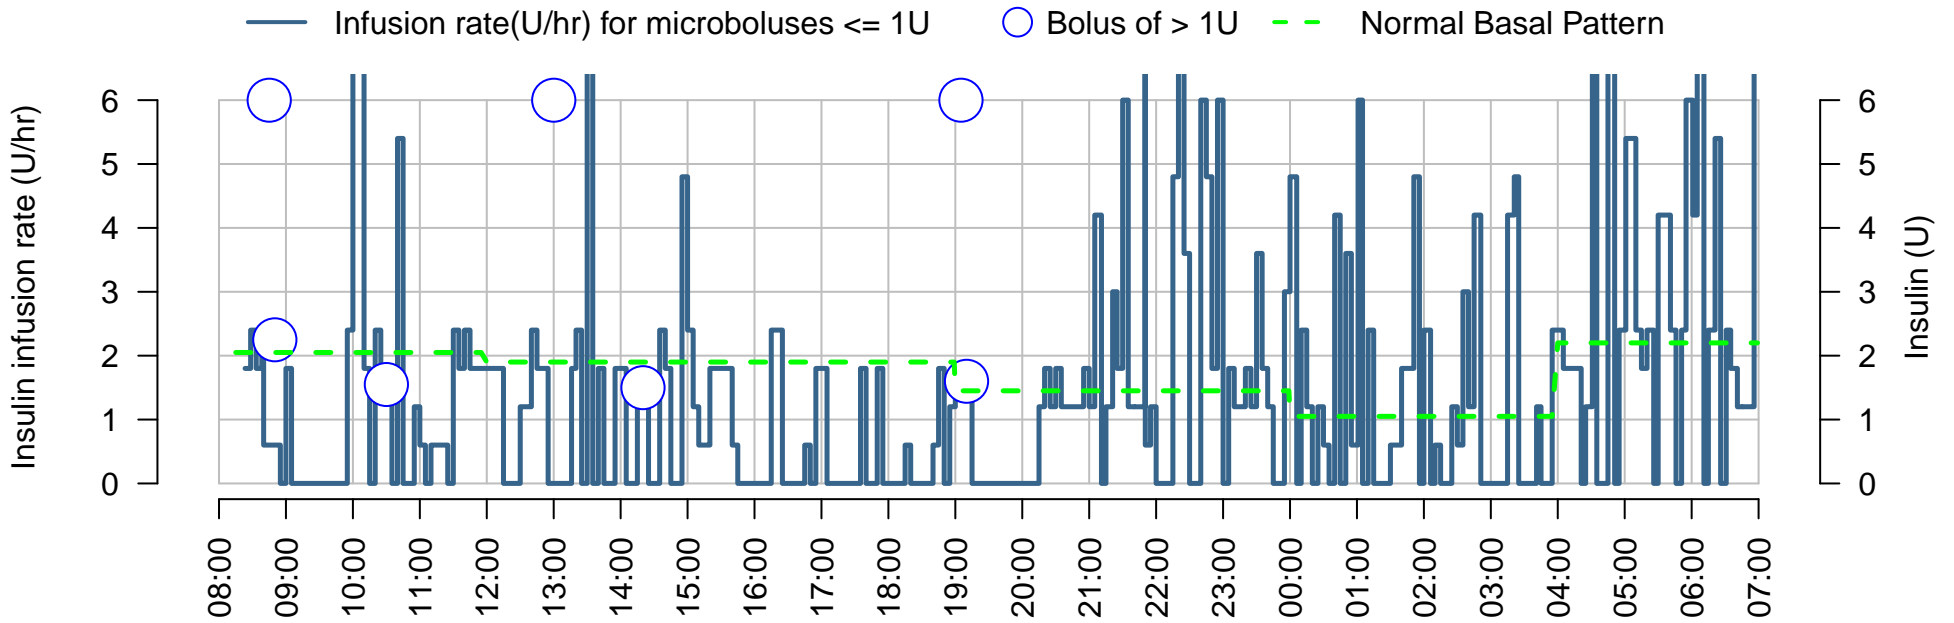

# Subject 51

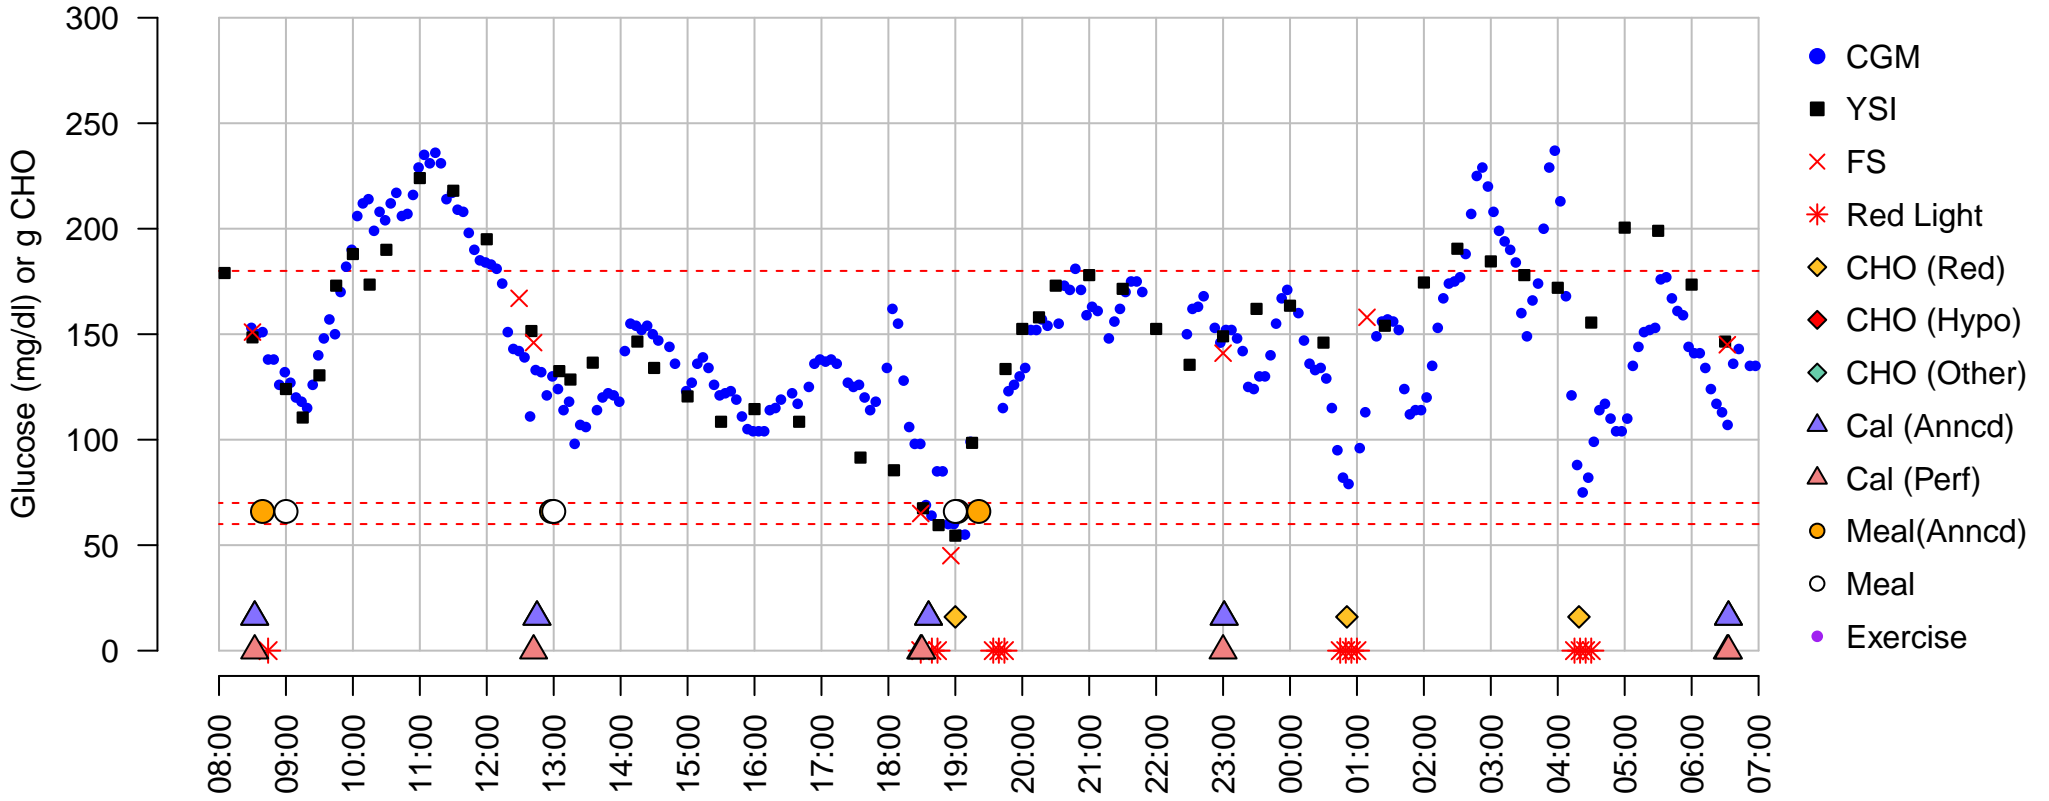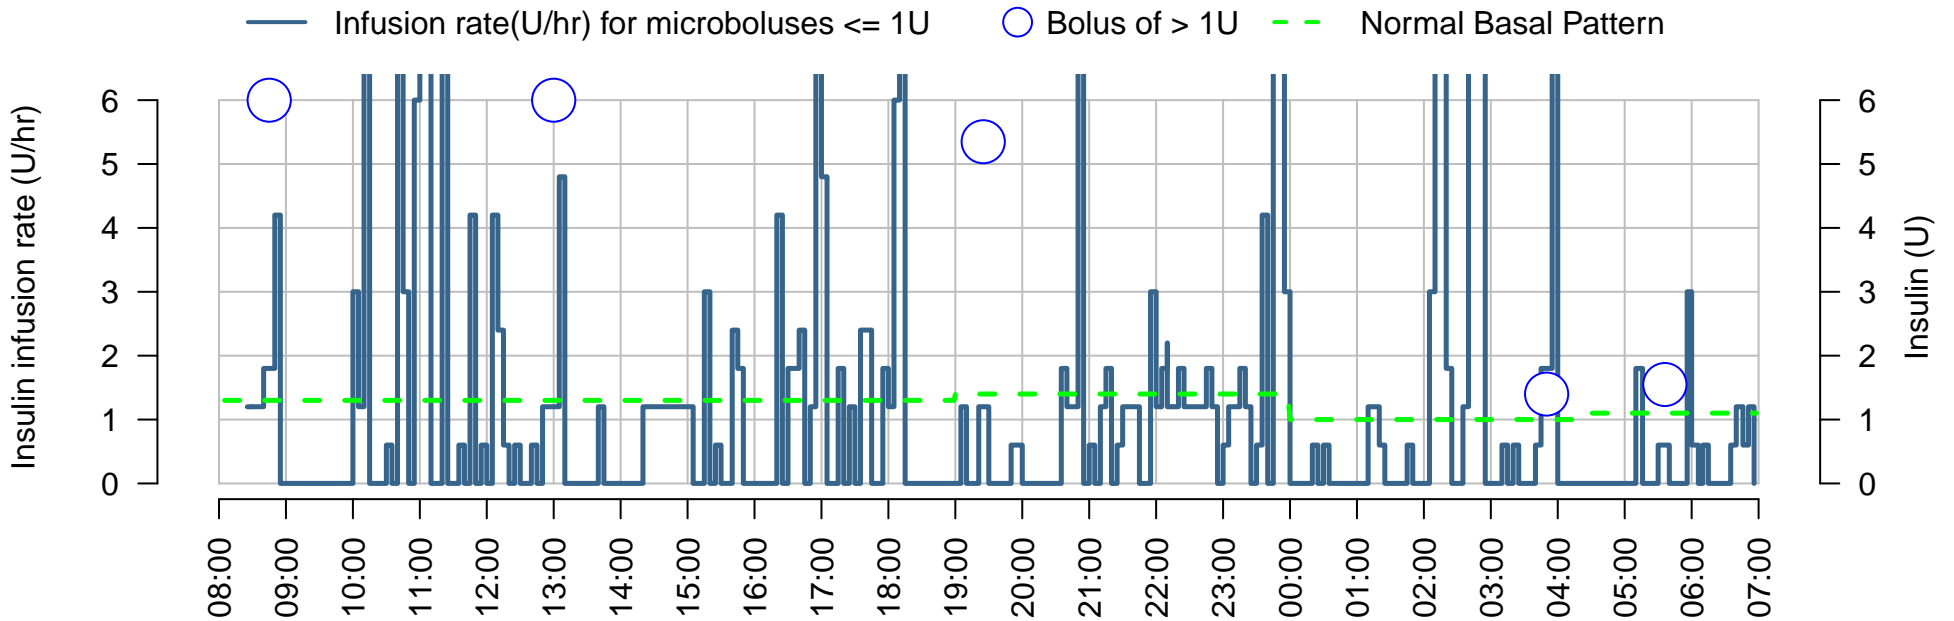

# Subject 52

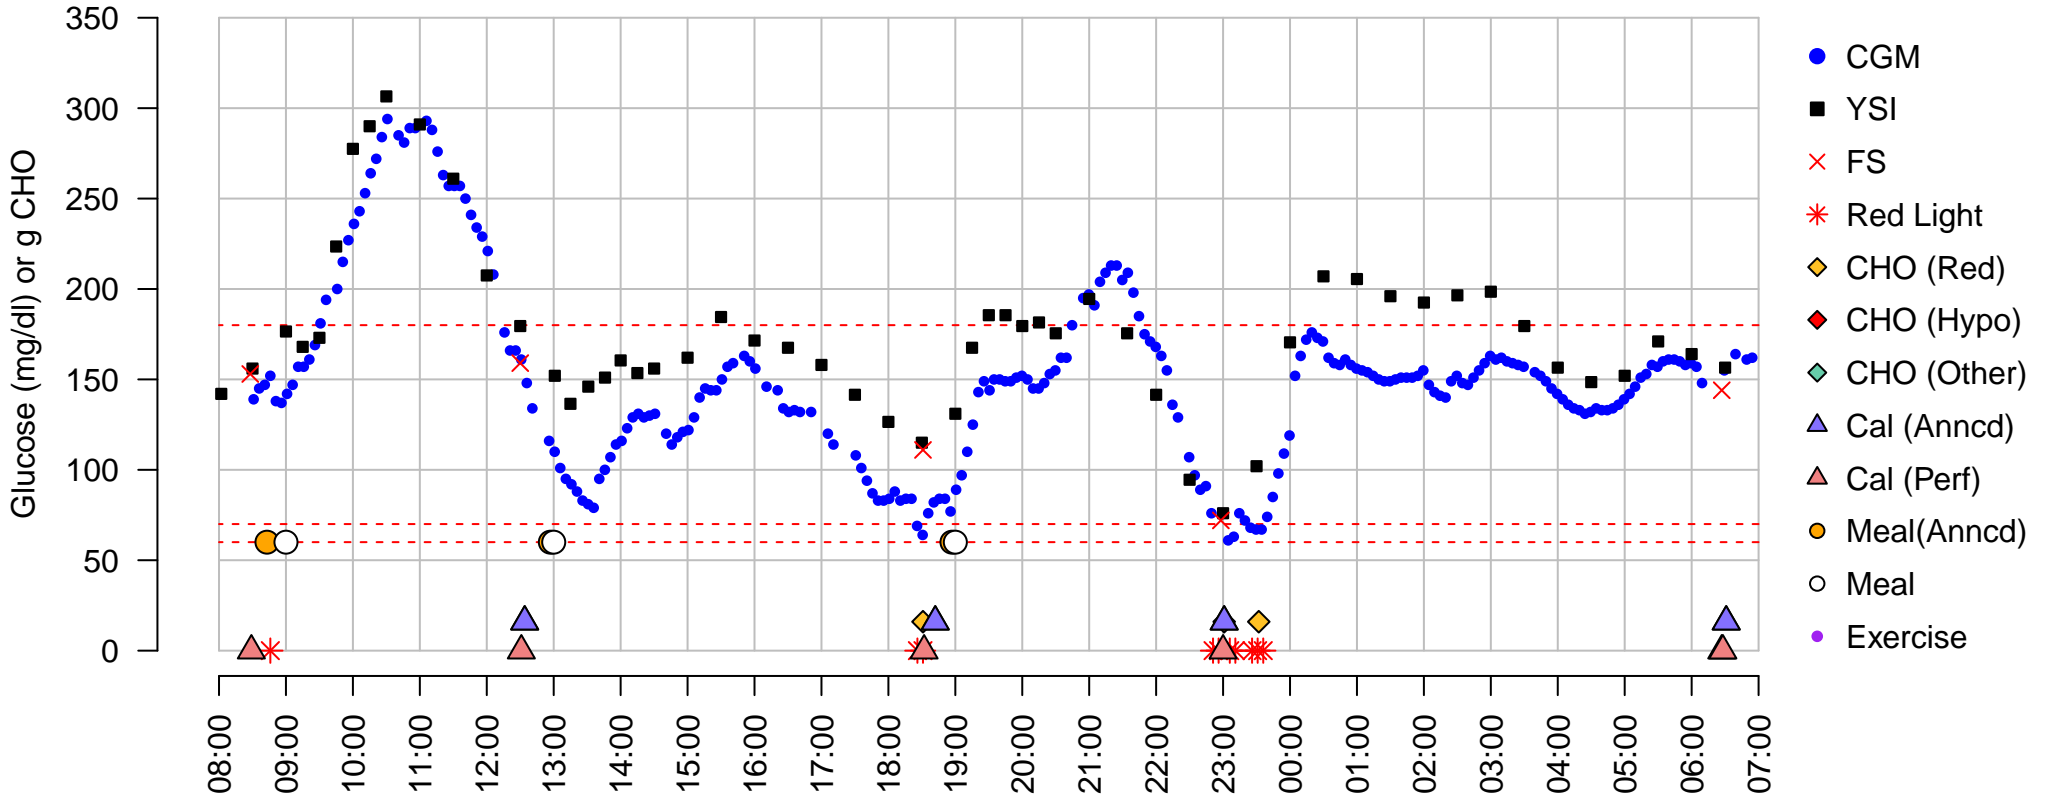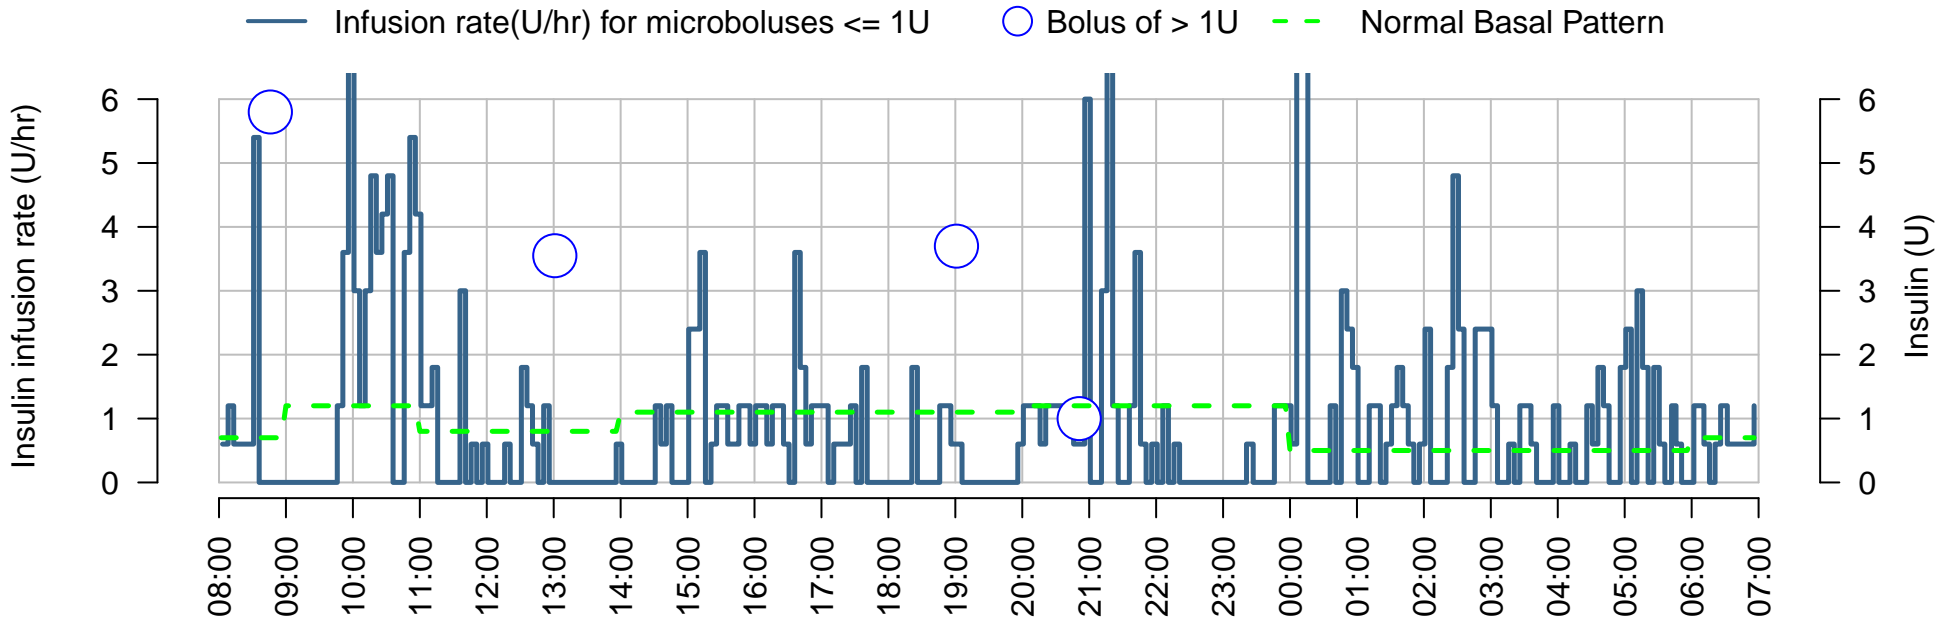

# Subject 53

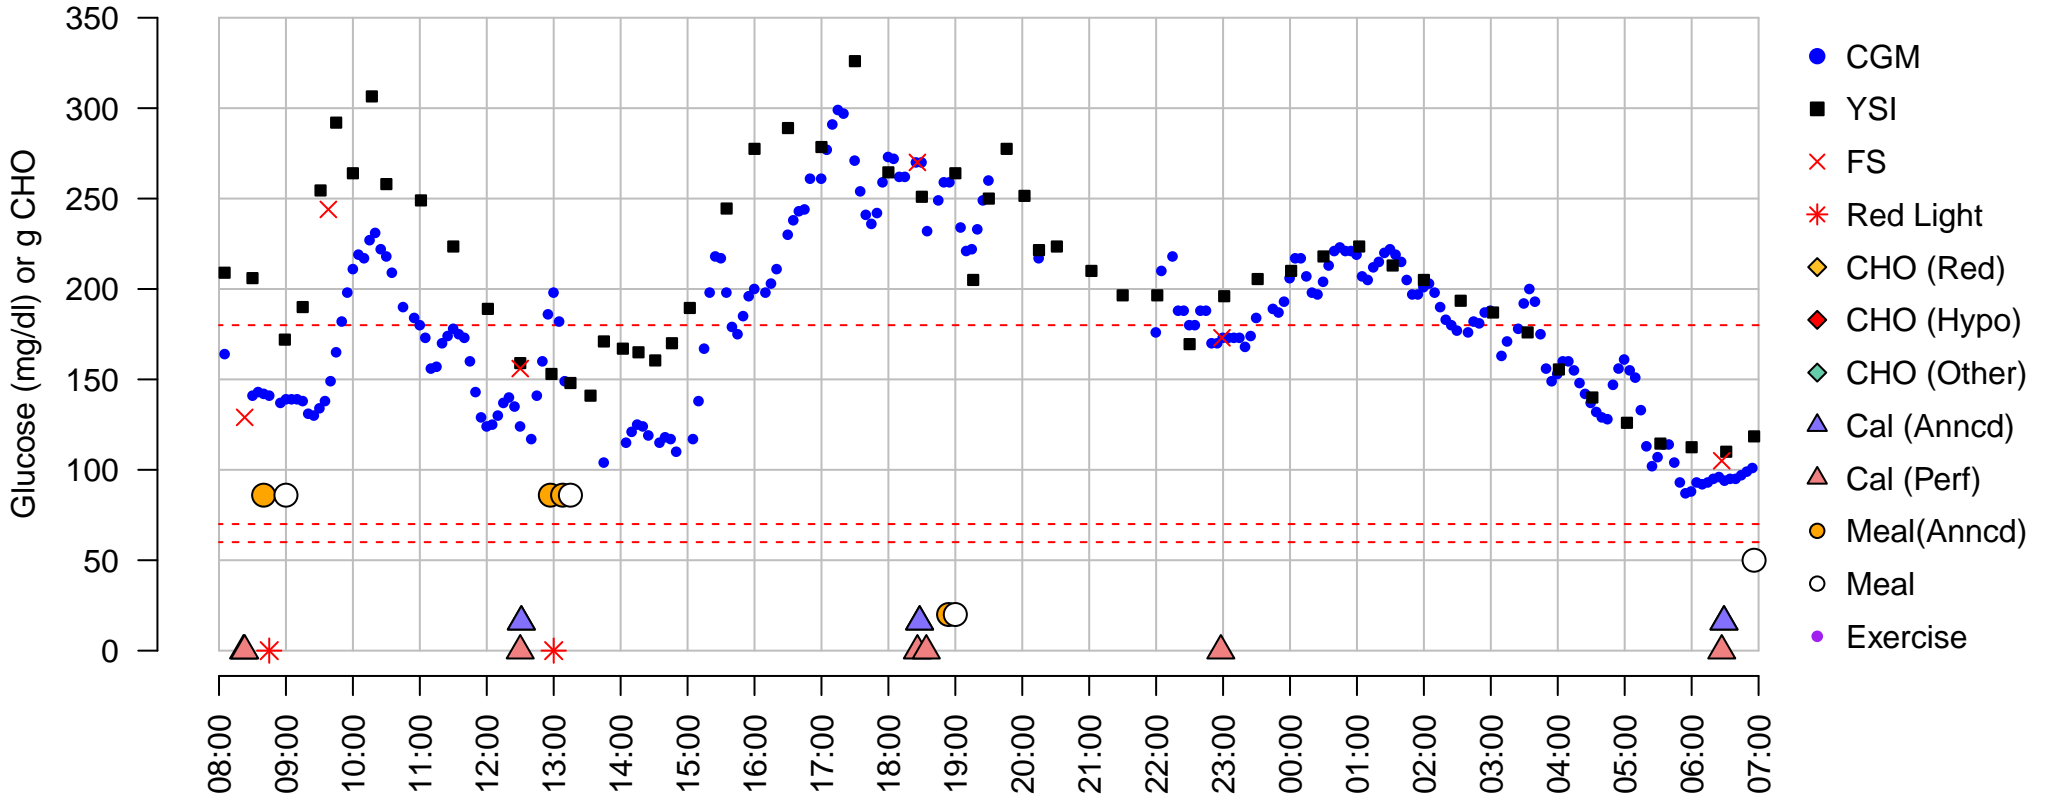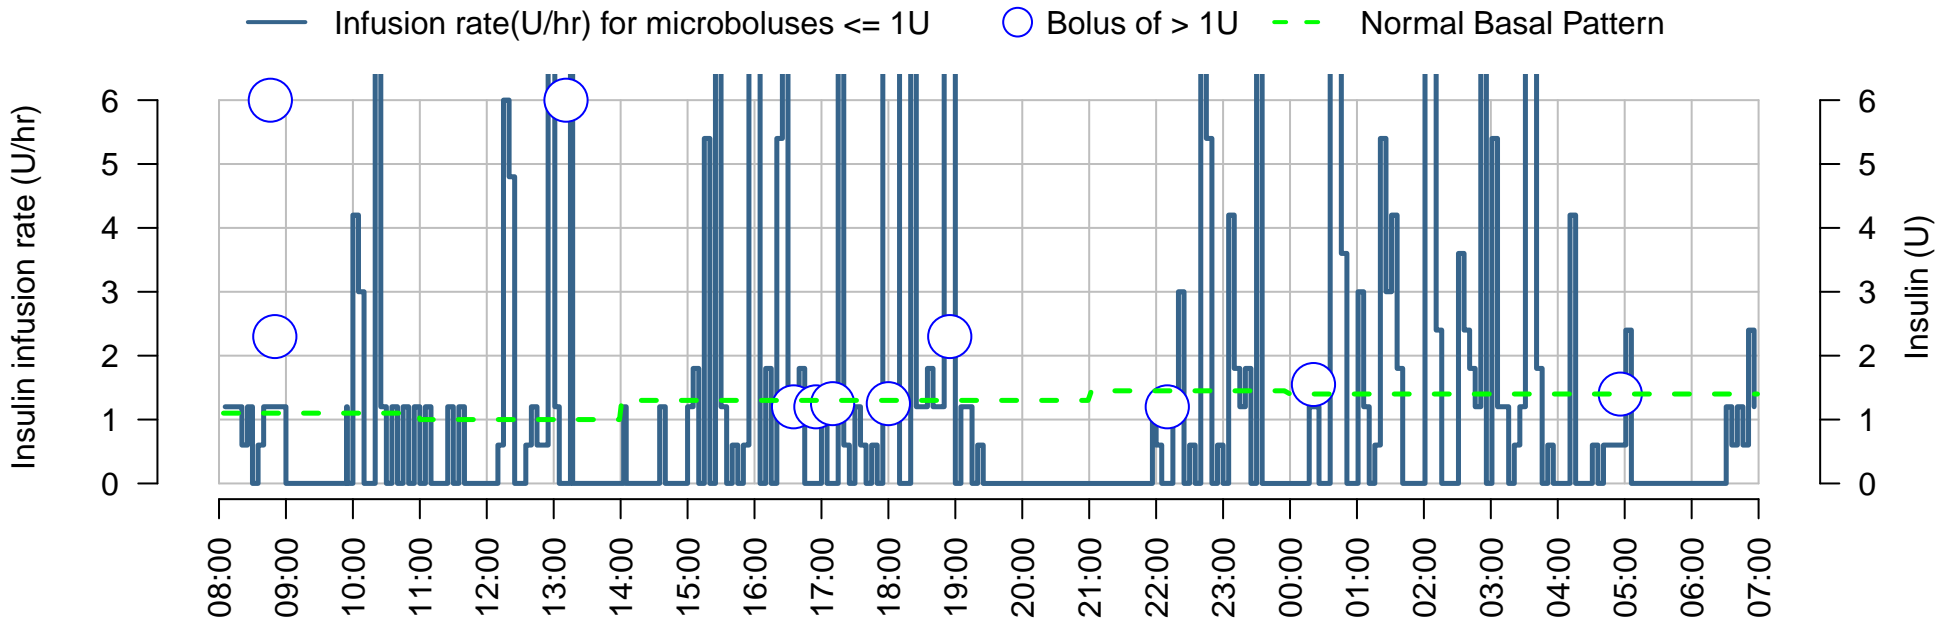

Supplement: Supp_Figures.pdf [file Supp_Figures.pdf]
