# Supplementary material
Source: PubMed Central journal article supplement (PMC4183913)
Supplement: Supp_Table1.pdf [file Supp_Table1.pdf]

## Supplementary Data

SUPPLEMENTARY TABLE S1. SUMMARY OF PROTOCOL DURING THE TWO CLINICAL RESEARCH CENTER ADMISSIONS

---

### Admission 1

- Admission at approximately 7:00 a.m.
- Standardized breakfast with normal bolus at approximately 9:00 a.m.
- Lunch with normal bolus at approximately 1:00 p.m.
- Dinner with normal bolus at approximately 7:00 p.m.
- Overnight sleep
- The next day, breakfast with missed meal bolus at approximately 7:00 a.m.
- Discharge at approximately 1:00 p.m.

### Admission 2

- Admission at approximately 7:00 a.m.
  - Standardized breakfast w/ normal bolus at approximately 9:00 a.m.
  - Lunch with normal bolus at approximately 1:00 p.m.
  - Exercise
  - Dinner with normal bolus at approximately 7:00 p.m.
  - Overnight sleep
  - The next day, breakfast with overbolus at approximately 7:00 a.m.
  - Discharge at approximately 1:00 p.m.
- 

The original protocol with three admissions had two admissions merged into the second admission.
