# Supplementary material
Source: PubMed Central journal article supplement (PMC4183913)
Supplement: Supp_Table2.pdf [file Supp_Table2.pdf]

SUPPLEMENTARY TABLE S2. SUBJECT-LEVEL GLYCEMIC OUTCOMES AND ASSOCIATED CONTROLLER BEHAVIOR, ADULT SUBJECTS

| Subject          | Age (years) | Number of YSI values | % 70-180 mg/dL | % Day 70-180 mg/dL | % Night 70-180 mg/dL | % <70 mg/dL | % <60 mg/dL | % >180 mg/dL | % >300 mg/dL | % >400 mg/dL | Peak (mg/dL) | Nadir (mg/dL) | Mean (mg/dL) | CV  | Red light | <60 mg/dL | >400 mg/dL |
|------------------|-------------|----------------------|----------------|--------------------|----------------------|-------------|-------------|--------------|--------------|--------------|--------------|---------------|--------------|-----|-----------|-----------|------------|
| 1                | 62          | 54                   | 68.5%          | 52.8%              | 100.0%               | 0%          | 0%          | 31%          | 0%           | 0%           | 283          | 82            | 163          | 33% | 1         | 0         | 0          |
| 8                | 55          | 50                   | 60.0%          | 60.0%              | 64.3%                | 0%          | 0%          | 40%          | 0%           | 0%           | 275          | 83            | 169          | 33% | 1         | 0         | 0          |
| 9                | 42          | 54                   | 70.4%          | 75.0%              | 56.3%                | 2%          | 0%          | 28%          | 0%           | 0%           | 206          | 70            | 153          | 25% | 1         | 0         | 0          |
| 13               | 35          | 53                   | 60.4%          | 41.7%              | 100.0%               | 0%          | 0%          | 40%          | 6%           | 0%           | 328          | 103           | 183          | 31% | 0         | 0         | 0          |
| 14               | 45          | 51                   | 41.2%          | 26.5% <sup>a</sup> | 73.3%                | 0%          | 0%          | 59%          | 0%           | 0%           | 254          | 109           | 187          | 22% | 0         | 0         | 0          |
| 16               | 44          | 54                   | 51.9%          | 38.9%              | 75.0%                | 0%          | 0%          | 48%          | 0%           | 0%           | 300          | 105           | 187          | 31% | 0         | 0         | 0          |
| 17               | 48          | 55                   | 70.9%          | 67.6%              | 75.0%                | 0%          | 0%          | 29%          | 4%           | 0%           | 312          | 99            | 177          | 29% | 1         | 0         | 0          |
| 18               | 41          | 55                   | 49.1%          | 37.8%              | 66.7%                | 0%          | 0%          | 51%          | 0%           | 0%           | 263          | 99            | 177          | 26% | 0         | 0         | 0          |
| 23               | 38          | 52                   | 71.2%          | 57.6%              | 100.0%               | 23%         | 13%         | 6%           | 0%           | 0%           | 204          | 40            | 103          | 39% | 1         | 1         | 0          |
| 24               | 30          | 54                   | 72.2%          | 73.0%              | 73.3%                | 2%          | 0%          | 26%          | 0%           | 0%           | 262          | 61            | 156          | 30% | 1         | 0         | 0          |
| 25               | 54          | 55                   | 58.2%          | 50.0%              | 68.8%                | 9%          | 9%          | 33%          | 0%           | 0%           | 294          | 60            | 148          | 47% | 1         | 1         | 0          |
| 26               | 25          | 55                   | 78.2%          | 75.7%              | 81.3%                | 0%          | 0%          | 22%          | 0%           | 0%           | 210          | 71            | 141          | 29% | 1         | 0         | 0          |
| 28               | 39          | 54                   | 75.9%          | 77.1%              | 68.8%                | 2%          | 0%          | 22%          | 0%           | 0%           | 266          | 64            | 153          | 29% | 1         | 0         | 0          |
| 30               | 21          | 54                   | 83.3%          | 77.8%              | 100.0%               | 17%         | 11%         | 0%           | 0%           | 0%           | 180          | 47            | 112          | 31% | 1         | 1         | 0          |
| 31               | 32          | 55                   | 41.8%          | 35.1%              | 50.0%                | 0%          | 0%          | 58%          | 5%           | 0%           | 316          | 125           | 206          | 28% | 1         | 0         | 0          |
| 34               | 45          | 54                   | 55.6%          | 38.9%              | 87.5%                | 6%          | 0%          | 39%          | 2%           | 0%           | 309          | 63            | 169          | 36% | 1         | 0         | 0          |
| 35               | 49          | 55                   | 80.0%          | 75.7%              | 100.0%               | 2%          | 0%          | 18%          | 0%           | 0%           | 247          | 67            | 131          | 34% | 1         | 0         | 0          |
| 36               | 27          | 53                   | 67.9%          | 52.8%              | 100.0%               | 0%          | 0%          | 32%          | 4%           | 0%           | 315          | 108           | 170          | 31% | 0         | 0         | 0          |
| 40               | 47          | 55                   | 52.7%          | 45.9%              | 80.0%                | 2%          | 0%          | 45%          | 0%           | 0%           | 234          | 64            | 176          | 21% | 1         | 0         | 0          |
| 42               | 55          | 52                   | 98.1%          | 97.2%              | 100.0%               | 2%          | 0%          | 0%           | 0%           | 0%           | 174          | 67            | 126          | 21% | 1         | 0         | 0          |
| 43               | 30          | 54                   | 40.7%          | 16.7% <sup>a</sup> | 87.5%                | 0%          | 0%          | 59%          | 0%           | 0%           | 291          | 126           | 193          | 23% | 0         | 0         | 0          |
| 47               | 40          | 55                   | 72.7%          | 59.5%              | 100.0%               | 5%          | 5%          | 22%          | 0%           | 0%           | 269          | 57            | 143          | 37% | 1         | 1         | 0          |
| 48               | 56          | 54                   | 70.4%          | 62.2%              | 86.7%                | 0%          | 0%          | 30%          | 0%           | 0%           | 226          | 100           | 160          | 19% | 0         | 0         | 0          |
| 49               | 49          | 55                   | 83.6%          | 75.7%              | 100.0%               | 4%          | 0%          | 13%          | 0%           | 0%           | 273          | 67            | 130          | 37% | 1         | 0         | 0          |
| 50               | 18          | 53                   | 75.5%          | 70.3%              | 87.5%                | 0%          | 0%          | 25%          | 0%           | 0%           | 226          | 97            | 161          | 21% | 0         | 0         | 0          |
| 51               | 27          | 49                   | 77.6%          | 78.1%              | 73.3%                | 4%          | 2%          | 18%          | 0%           | 0%           | 224          | 55            | 151          | 25% | 1         | 1         | 0          |
| 52               | 40          | 55                   | 67.3%          | 67.6%              | 62.5%                | 0%          | 0%          | 33%          | 2%           | 0%           | 307          | 76            | 175          | 26% | 1         | 0         | 0          |
| Overall (median) | 41          | 54,000               | 70.4%          | 60.0%              | 81.3%                | 0%          | 0%          | 30%          | 0%           | 0%           | 265.50       | 71.000        | 161          | 29% | 1.000     | 0.000     | 0.000      |

<sup>a</sup>Failed to meet predetermined success criterion. CV, coefficient of variation (%).
