# Supplementary material
Source: PubMed Central journal article supplement (PMC4183913)
Supplement: Supp_Table3.pdf [file Supp_Table3.pdf]

SUPPLEMENTARY TABLE S3. SUBJECT-LEVEL GLYCEMIC OUTCOMES AND ASSOCIATED CONTROLLER BEHAVIOR, ADOLESCENT SUBJECTS

| Subject          | Age (years) | Number of YSI values | % 70-180 mg/dL     | % Day 70-180 mg/dL | % Night 70-180 mg/dL | % <70 mg/dL | % <60 mg/dL | % >180 mg/dL | % >300 mg/dL | % >400 mg/dL | Peak (mg/dL) | Nadir (mg/dL) | Mean (mg/dL) | CV  | Red light | <60 mg/dL | >400 mg/dL |
|------------------|-------------|----------------------|--------------------|--------------------|----------------------|-------------|-------------|--------------|--------------|--------------|--------------|---------------|--------------|-----|-----------|-----------|------------|
| 2                | 15          | 55                   | 92.7%              | 91.9%              | 93.8%                | 0%          | 0%          | 7%           | 0%           | 0%           | 191          | 90            | 140          | 17% | 1         | 0         | 0          |
| 3                | 15          | 46                   | 54.3%              | 37.9%              | 81.3%                | 0%          | 0%          | 46%          | 2%           | 0%           | 310          | 108           | 179          | 32% | 1         | 0         | 0          |
| 4                | 14          | 52                   | 57.7%              | 41.2%              | 87.5%                | 0%          | 0%          | 42%          | 0%           | 0%           | 273          | 80            | 177          | 29% | 1         | 0         | 0          |
| 5                | 12          | 55                   | 74.5%              | 62.2%              | 100.0%               | 0%          | 0%          | 25%          | 0%           | 0%           | 245          | 109           | 163          | 20% | 0         | 0         | 0          |
| 6                | 16          | 50                   | 56.0%              | 41.2%              | 86.7%                | 0%          | 0%          | 44%          | 0%           | 0%           | 244          | 82            | 173          | 21% | 1         | 0         | 0          |
| 7                | 14          | 55                   | 81.8%              | 75.7%              | 100.0%               | 5%          | 2%          | 13%          | 0%           | 0%           | 196          | 60            | 135          | 24% | 1         | 1         | 0          |
| 10               | 14          | 55                   | 40.0%              | 29.7% <sup>a</sup> | 68.8%                | 2%          | 2%          | 58%          | 9%           | 0%           | 363          | 59            | 192          | 37% | 1         | 1         | 0          |
| 11               | 14          | 53                   | 84.9%              | 77.1%              | 100.0%               | 0%          | 0%          | 15%          | 0%           | 0%           | 201          | 85            | 143          | 21% | 0         | 0         | 0          |
| 12               | 15          | 55                   | 78.2%              | 67.6%              | 100.0%               | 0%          | 0%          | 22%          | 0%           | 0%           | 271          | 71            | 143          | 37% | 1         | 0         | 0          |
| 15               | 16          | 51                   | 76.5%              | 63.6%              | 100.0%               | 0%          | 0%          | 24%          | 0%           | 0%           | 209          | 85            | 140          | 28% | 0         | 0         | 0          |
| 19               | 14          | 49                   | 30.6%              | 21.6% <sup>a</sup> | 70.0%                | 0%          | 0%          | 69%          | 10%          | 0%           | 320          | 106           | 211          | 27% | 0         | 0         | 0          |
| 20               | 17          | 49                   | 87.8%              | 81.3%              | 100.0%               | 0%          | 0%          | 12%          | 0%           | 0%           | 216          | 86            | 131          | 24% | 1         | 0         | 0          |
| 21               | 13          | 48                   | 29.2% <sup>a</sup> | 21.2% <sup>a</sup> | 50.0%                | 0%          | 0%          | 71%          | 2%           | 0%           | 302          | 89            | 207          | 29% | 0         | 0         | 0          |
| 22               | 17          | 44                   | 95.5%              | 100.0%             | 60.0%                | 0%          | 0%          | 5%           | 0%           | 0%           | 246          | 102           | 146          | 17% | 0         | 0         | 0          |
| 27               | 13          | 53                   | 62.3%              | 75.0%              | 26.7% <sup>a</sup>   | 0%          | 0%          | 38%          | 0%           | 0%           | 248          | 80            | 160          | 27% | 1         | 0         | 0          |
| 29               | 17          | 54                   | 29.6% <sup>a</sup> | 11.1% <sup>a</sup> | 75.0%                | 0%          | 0%          | 70%          | 0%           | 0%           | 288          | 122           | 203          | 23% | 0         | 0         | 0          |
| 32               | 17          | 54                   | 68.5%              | 61.1%              | 93.3%                | 6%          | 2%          | 26%          | 11%          | 0%           | 325          | 60            | 151          | 52% | 1         | 1         | 0          |
| 37               | 17          | 56                   | 46.4%              | 33.3%              | 64.7%                | 0%          | 0%          | 54%          | 5%           | 0%           | 325          | 102           | 188          | 31% | 1         | 0         | 0          |
| 38               | 15          | 56                   | 46.4%              | 32.4%              | 75.0%                | 0%          | 0%          | 54%          | 0%           | 0%           | 276          | 81            | 180          | 30% | 1         | 0         | 0          |
| 39               | 15          | 53                   | 75.5%              | 71.4%              | 93.8%                | 2%          | 2%          | 23%          | 0%           | 0%           | 237          | 60            | 136          | 38% | 1         | 1         | 0          |
| 41               | 15          | 54                   | 51.9%              | 32.4%              | 100.0%               | 0%          | 0%          | 48%          | 0%           | 0%           | 256          | 102           | 176          | 23% | 0         | 0         | 0          |
| 44               | 15          | 55                   | 85.5%              | 78.4%              | 100.0%               | 0%          | 0%          | 15%          | 0%           | 0%           | 246          | 83            | 144          | 27% | 1         | 0         | 0          |
| 45               | 16          | 49                   | 85.7%              | 83.9%              | 87.5%                | 12%         | 2%          | 2%           | 0%           | 0%           | 209          | 56            | 109          | 31% | 1         | 1         | 0          |
| 46               | 14          | 53                   | 35.8%              | 8.3% <sup>a</sup>  | 93.8%                | 0%          | 0%          | 64%          | 8%           | 0%           | 324          | 105           | 206          | 33% | 0         | 0         | 0          |
| 53               | 16          | 55                   | 30.9% <sup>a</sup> | 25.0% <sup>a</sup> | 43.8%                | 0%          | 0%          | 69%          | 4%           | 0%           | 326          | 110           | 208          | 25% | 0         | 0         | 0          |
| Overall (median) | 15          | 53,000               | 62.3%              | 61.1%              | 87.5%                | 0%          | 0%          | 38%          | 0%           | 0%           | 256.00       | 85,000        | 163          | 27% | 1,000     | 0,000     | 0,000      |

<sup>a</sup>Failed to meet predetermined success criterion.

CV, coefficient of variation (%).
